# Supplementary material for: HOPS recognizes each SNARE, assembling ternary trans-complexes for rapid fusion upon engagement with the 4th SNARE
Source: eLife. 2020 Jan 21;9:e53559. doi: 10.7554/eLife.53559 (PMC6994237; doi:10.7554/eLife.53559)
Supplement: Figure 1—source data 1. [file elife-53559-fig1-data1.xlsx]

## Sheet: Figure A
	Raw Data					Ratio to MAX DATA					% MAX DATA
minutes	Buffer	GST-PX	HOPS		minutes	Buffer	GST-PX	HOPS		minutes	Buffer	GST-PX	HOPS
0	82.211	86.661	93.592		0	0.00432734	0.0114993	0.0226698		0	0.432734	1.14993	2.26698
1	83.385	86.075	120.339		1	0.00621944	0.0105548	0.0657771		1	0.621944	1.05548	6.57771
2	80.788	91.819	139.339		2	0.00203393	0.0198123	0.0963989		2	0.203393	1.98123	9.63989
3	81.648	94.481	150.167		3	0.00341997	0.0241025	0.11385		3	0.341997	2.41025	11.385
4	83.334	97.741	162.343		4	0.00613724	0.0293566	0.133474		4	0.613724	2.93566	13.3474
5	81.859	100.896	171.794		5	0.00376003	0.0344414	0.148706		5	0.376003	3.44414	14.8706
6	80.79	105.542	178.73		6	0.00203715	0.0419292	0.159884		6	0.203715	4.19292	15.9884
7	82.908	108.398	180.688		7	0.00545067	0.0465322	0.16304		7	0.545067	4.65322	16.304
8	81.625	113.943	185.808		8	0.0033829	0.0554689	0.171292		8	0.33829	5.54689	17.1292
9	81.85	115.759	191.867		9	0.00374552	0.0583957	0.181057		9	0.374552	5.83957	18.1057
10	82.274	119.925	195.953		10	0.00442887	0.0651099	0.187642		10	0.442887	6.51099	18.7642
11	82.608	124.621	200.256		11	0.00496717	0.0726783	0.194577		11	0.496717	7.26783	19.4577
12	81.584	126.35	202.235		12	0.00331682	0.0754649	0.197767		12	0.331682	7.54649	19.7767
13	81.825	128.037	208.21		13	0.00370523	0.0781838	0.207396		13	0.370523	7.81838	20.7396
14	81.727	131.264	211.259		14	0.00354729	0.0833846	0.21231		14	0.354729	8.33846	21.231
15	81.078	133.354	211.232		15	0.00250131	0.086753	0.212267		15	0.250131	8.6753	21.2267
16	81.962	138.132	218.421		16	0.00392603	0.0944536	0.223853		16	0.392603	9.44536	22.3853
17	82.369	138.711	220.695		17	0.00458198	0.0953868	0.227518		17	0.458198	9.53868	22.7518
18	82.166	141.66	224.048		18	0.00425481	0.10014	0.232922		18	0.425481	10.014	23.2922
19	81.752	143.379	226.963		19	0.00358758	0.10291	0.23762		19	0.358758	10.291	23.762
20	81.616	144.254	225.723		20	0.00336839	0.10432	0.235621		20	0.336839	10.432	23.5621
21	80.765	146.932	226.894		21	0.00199686	0.108636	0.237509		21	0.199686	10.8636	23.7509
22	82.035	149.5	230.629		22	0.00404368	0.112775	0.243528		22	0.404368	11.2775	24.3528
23	81.969	150.685	230.911		23	0.00393731	0.114685	0.243983		23	0.393731	11.4685	24.3983
24	81.983	153.313	234.155		24	0.00395988	0.11892	0.249211		24	0.395988	11.892	24.9211
25	81.349	154.18	234.588		25	0.00293808	0.120318	0.249909		25	0.293808	12.0318	24.9909
26	80.192	153.552	238.942		26	0.00107337	0.119306	0.256926		26	0.107337	11.9306	25.6926
27	82.302	153.365	236.56		27	0.004474	0.119004	0.253087		27	0.4474	11.9004	25.3087
28	80.244	155.955	237.847		28	0.00115718	0.123178	0.255161		28	0.115718	12.3178	25.5161
29	80.823	156.14	241.121		29	0.00209034	0.123477	0.260438		29	0.209034	12.3477	26.0438
30	79.526	157.012	239.633		30	0	0.124882	0.25804		30	0	12.4882	25.804
31	81.766	157.041	241.168		31	0.00361014	0.124929	0.260514		31	0.361014	12.4929	26.0514
32	82.321	157.498	241.251		32	0.00450462	0.125665	0.260648		32	0.450462	12.5665	26.0648
33	82	158.852	240.68		33	0.00398727	0.127847	0.259727		33	0.398727	12.7847	25.9727
34	81.398	159.736	244.27		34	0.00301705	0.129272	0.265513		34	0.301705	12.9272	26.5513
35	81.094	159.495	243.616		35	0.0025271	0.128884	0.264459		35	0.25271	12.8884	26.4459
36	80.399	159.502	243.037		36	0.00140699	0.128895	0.263526		36	0.140699	12.8895	26.3526
37	82.862	161.486	243.287		37	0.00537653	0.132093	0.263929		37	0.537653	13.2093	26.3929
38	81.882	157.928	245.716		38	0.0037971	0.126358	0.267844		38	0.37971	12.6358	26.7844
39	83.182	157.887	245.043		39	0.00589227	0.126292	0.266759		39	0.589227	12.6292	26.6759
40	81.598	159.737	246.857		40	0.00333938	0.129274	0.269683		40	0.333938	12.9274	26.9683
41	82.627	159.734	246.716		41	0.00499779	0.129269	0.269455		41	0.499779	12.9269	26.9455
42	80.23	157.852	244.149		42	0.00113462	0.126236	0.265318		42	0.113462	12.6236	26.5318
43	80.838	158.238	244.491		43	0.00211451	0.126858	0.265869		43	0.211451	12.6858	26.5869
44	81.06	158.725	247.117		44	0.0024723	0.127643	0.270102		44	0.24723	12.7643	27.0102
45	81.935	159.156	247.211		45	0.00388252	0.128337	0.270253		45	0.388252	12.8337	27.0253
46	80.992	157.99	246.315		46	0.00236271	0.126458	0.268809		46	0.236271	12.6458	26.8809
47	80.709	157.075	246.39		47	0.00190661	0.124983	0.26893		47	0.190661	12.4983	26.893
48	80.585	157.485	245.754		48	0.00170676	0.125644	0.267905		48	0.170676	12.5644	26.7905
49	80.6	155.545	246.494		49	0.00173093	0.122518	0.269097		49	0.173093	12.2518	26.9097
50	82.067	156.527	246.329		50	0.00409526	0.1241	0.268832		50	0.409526	12.41	26.8832
51	81.137	158.603	244.984		51	0.0025964	0.127446	0.266664		51	0.25964	12.7446	26.6664
52	81.91	156.512	246.194		52	0.00384222	0.124076	0.268614		52	0.384222	12.4076	26.8614
53	80.212	153.293	246.454		53	0.00110561	0.118888	0.269033		53	0.110561	11.8888	26.9033
54	80.203	156.566	246.36		54	0.0010911	0.124163	0.268882		54	0.10911	12.4163	26.8882
55	80.765	154.676	245.783		55	0.00199686	0.121117	0.267952		55	0.199686	12.1117	26.7952
56	80.717	156.005	244.151		56	0.0019195	0.123259	0.265321		56	0.19195	12.3259	26.5321
57	80.26	153.818	244.075		57	0.00118297	0.119734	0.265199		57	0.118297	11.9734	26.5199
58	81.395	151.667	244.358		58	0.00301221	0.116268	0.265655		58	0.301221	11.6268	26.5655
59	81.078	151.784	242.653		59	0.00250131	0.116456	0.262907		59	0.250131	11.6456	26.2907
60	80.486	155.744	243.33		60	0.0015472	0.122838	0.263998		60	0.15472	12.2838	26.3998

## Sheet: Figure B
	Raw Data					Ratio to MAX DATA					% MAX DATA
minutes	Buffer	GST-PX	HOPS		minutes	Buffer	GST-PX	HOPS		minutes	Buffer	GST-PX	HOPS
0	87.852	90.713	97.001		0	0.00387613	0.00853172	0.0187639		0	0.387613	0.853172	1.87639
1	90.012	91.709	117.413		1	0.00739101	0.0101525	0.0519796		1	0.739101	1.01525	5.19796
2	86.828	92.601	134.138		2	0.00220982	0.011604	0.0791955		2	0.220982	1.1604	7.91955
3	89.118	92.54	144.506		3	0.00593624	0.0115047	0.0960669		3	0.593624	1.15047	9.60669
4	89.896	94.418	149.631		4	0.00720225	0.0145607	0.104407		4	0.720225	1.45607	10.4407
5	87.895	96.569	158.604		5	0.00394611	0.018061	0.119008		5	0.394611	1.8061	11.9008
6	88.855	98.917	162.538		6	0.00550827	0.0218818	0.12541		6	0.550827	2.18818	12.541
7	89.236	98.688	170.792		7	0.00612826	0.0215091	0.138841		7	0.612826	2.15091	13.8841
8	88.104	101.25	171.629		8	0.0042862	0.0256782	0.140203		8	0.42862	2.56782	14.0203
9	87.772	102.824	177.3		9	0.00374595	0.0282395	0.149431		9	0.374595	2.82395	14.9431
10	88.411	103.53	177.094		10	0.00478577	0.0293883	0.149096		10	0.478577	2.93883	14.9096
11	88.01	107.181	181.924		11	0.00413324	0.0353294	0.156956		11	0.413324	3.53294	15.6956
12	88.305	106.057	183.288		12	0.00461328	0.0335004	0.159175		12	0.461328	3.35004	15.9175
13	88.707	108.641	186.611		13	0.00526744	0.0377052	0.164583		13	0.526744	3.77052	16.4583
14	88.687	111.702	188.177		14	0.00523489	0.0426863	0.167131		14	0.523489	4.26863	16.7131
15	88.176	112.277	193.108		15	0.00440337	0.043622	0.175155		15	0.440337	4.3622	17.5155
16	87.994	114.587	190.438		16	0.0041072	0.0473809	0.17081		16	0.41072	4.73809	17.081
17	87.04	115.036	194.985		17	0.0025548	0.0481116	0.178209		17	0.25548	4.81116	17.8209
18	87.609	118.184	196.932		18	0.00348071	0.0532342	0.181378		18	0.348071	5.32342	18.1378
19	87.417	116.802	197.452		19	0.00316827	0.0509853	0.182224		19	0.316827	5.09853	18.2224
20	87.612	120.334	199.341		20	0.00348559	0.0567328	0.185298		20	0.348559	5.67328	18.5298
21	87.721	119.944	199.113		21	0.00366296	0.0560982	0.184927		21	0.366296	5.60982	18.4927
22	86.776	121.668	202.245		22	0.0021252	0.0589036	0.190023		22	0.21252	5.89036	19.0023
23	86.789	124.909	205.37		23	0.00214636	0.0641775	0.195108		23	0.214636	6.41775	19.5108
24	86.044	126.664	204.841		24	0.000934047	0.0670333	0.194248		24	0.0934047	6.70333	19.4248
25	86.681	124.961	208.651		25	0.00197061	0.0642621	0.200447		25	0.197061	6.42621	20.0447
26	88.56	126.781	210.612		26	0.00502823	0.0672237	0.203639		26	0.502823	6.72237	20.3639
27	87.653	127.76	211.639		27	0.00355231	0.0688168	0.20531		27	0.355231	6.88168	20.531
28	87.6	129.159	210.338		28	0.00346606	0.0710934	0.203193		28	0.346606	7.10934	20.3193
29	88.253	130.899	213.893		29	0.00452866	0.0739248	0.208978		29	0.452866	7.39248	20.8978
30	86.494	130.999	212.362		30	0.00166631	0.0740875	0.206486		30	0.166631	7.40875	20.6486
31	88.031	130.979	215.052		31	0.00416741	0.074055	0.210864		31	0.416741	7.4055	21.0864
32	87.196	133.114	215.791		32	0.00280865	0.0775292	0.212066		32	0.280865	7.75292	21.2066
33	87.007	134.041	216.637		33	0.0025011	0.0790376	0.213443		33	0.25011	7.90376	21.3443
34	87.178	132.991	218.502		34	0.00277936	0.077329	0.216478		34	0.277936	7.7329	21.6478
35	86.911	136.694	217.293		35	0.00234488	0.0833548	0.21451		35	0.234488	8.33548	21.451
36	86.981	136.129	220.11		36	0.00245879	0.0824354	0.219094		36	0.245879	8.24354	21.9094
37	86.075	136.049	219.449		37	0.000984492	0.0823052	0.218019		37	0.0984492	8.23052	21.8019
38	85.47	136.106	221.614		38	0	0.0823979	0.221542		38	0	8.23979	22.1542
39	85.64	138.932	221.956		39	0.000276634	0.0869966	0.222098		39	0.0276634	8.69966	22.2098
40	86.516	139.476	220.034		40	0.00170211	0.0878818	0.218971		40	0.170211	8.78818	21.8971
41	85.444	140.086	223.088		41	-4.23088e-05	0.0888744	0.22394		41	-0.00423088	8.88744	22.394
42	87.76	141.648	223.155		42	0.00372643	0.0914162	0.224049		42	0.372643	9.14162	22.4049
43	87.03	141.5	223.656		43	0.00253853	0.0911754	0.224865		43	0.253853	9.11754	22.4865
44	85.357	141.802	224.109		44	-0.00018388	0.0916668	0.225602		44	-0.018388	9.16668	22.5602
45	85.038	142.142	222.258		45	-0.000702976	0.0922201	0.22259		45	-0.0702976	9.22201	22.259
46	85.566	143.099	223.153		46	0.000156217	0.0937774	0.224046		46	0.0156217	9.37774	22.4046
47	85.642	144.752	224.497		47	0.000279889	0.0964672	0.226233		47	0.0279889	9.64672	22.6233
48	84.317	145.766	227.042		48	-0.00187623	0.0981173	0.230374		48	-0.187623	9.81173	23.0374
49	86.62	145.618	223.793		49	0.00187135	0.0978764	0.225087		49	0.187135	9.78764	22.5087
50	86.323	146.415	224.216		50	0.00138805	0.0991734	0.225776		50	0.138805	9.91734	22.5776
51	85.646	147.12	225.916		51	0.000286398	0.100321	0.228542		51	0.0286398	10.0321	22.8542
52	85.595	146.084	225.282		52	0.000203407	0.0986347	0.22751		52	0.0203407	9.86347	22.751
53	86.769	145.617	225.601		53	0.00211381	0.0978748	0.22803		53	0.211381	9.78748	22.803
54	83.919	145.705	225.651		54	-0.00252388	0.098018	0.228111		54	-0.252388	9.8018	22.8111
55	85.919	145.869	224.508		55	0.00073064	0.0982849	0.226251		55	0.073064	9.82849	22.6251
56	85.096	145.108	223.325		56	-0.000608595	0.0970465	0.224326		56	-0.0608595	9.70465	22.4326
57	85.283	144.861	224.933		57	-0.000304298	0.0966446	0.226943		57	-0.0304298	9.66446	22.6943
58	85.923	144.422	225.525		58	0.000737149	0.0959302	0.227906		58	0.0737149	9.59302	22.7906
59	86.106	146.34	224.82		59	0.00103494	0.0990513	0.226759		59	0.103494	9.90513	22.6759
60	85.339	144.918	224.111		60	-0.000213171	0.0967373	0.225605		60	-0.0213171	9.67373	22.5605

## Sheet: Figure C
	Raw Data							Ratio to MAX DATA							%/MAX DATA
minutes	sQa	sQa, GST-PX	sQa, HOPS	GST-PX	HOPS		minutes	sQa	sQa, GST-PX	sQa, HOPS	GST-PX	HOPS		minutes	sQa	sQa, GST-PX	sQa, HOPS	GST-PX	HOPS
0	88.476	91.087	108.085	92.164	92.857		0	0.00652758	0.0107694	0.0383841	0.012519	0.0136449		0	0.652758	1.07694	3.83841	1.2519	1.36449
1	87.903	91.358	130.753	90.775	93.581		1	0.00559669	0.0112096	0.0752101	0.0102625	0.0148211		1	0.559669	1.12096	7.52101	1.02625	1.48211
2	87.91	89.565	148.11	91.228	91.255		2	0.00560807	0.00829675	0.103408	0.0109984	0.0110423		2	0.560807	0.829675	10.3408	1.09984	1.10423
3	89.288	89.15	160.959	91.257	90.97		3	0.00784674	0.00762255	0.124282	0.0110456	0.0105793		3	0.784674	0.762255	12.4282	1.10456	1.05793
4	88.844	88.455	167.974	90.709	90.22		4	0.00712543	0.00649346	0.135679	0.0101553	0.00936086		4	0.712543	0.649346	13.5679	1.01553	0.936086
5	89.074	89.058	175.415	89.368	90.831		5	0.00749908	0.00747309	0.147767	0.00797671	0.0103535		5	0.749908	0.747309	14.7767	0.797671	1.03535
6	88.336	87.306	178.776	89.938	89.305		6	0.00630014	0.00462682	0.153228	0.00890272	0.00787436		6	0.630014	0.462682	15.3228	0.890272	0.787436
7	86.954	86.654	185.063	91.047	90.13		7	0.00405496	0.00356759	0.163441	0.0107044	0.00921464		7	0.405496	0.356759	16.3441	1.07044	0.921464
8	89.372	87.101	190.382	89.737	89.862		8	0.00798321	0.00429378	0.172082	0.00857618	0.00877925		8	0.798321	0.429378	17.2082	0.857618	0.877925
9	87.548	88.464	191.408	89.52	89.588		9	0.00501997	0.00650809	0.173749	0.00822365	0.00833412		9	0.501997	0.650809	17.3749	0.822365	0.833412
10	87.585	87.8	194.936	90.252	91.06		10	0.00508008	0.00542936	0.179481	0.00941284	0.0107255		10	0.508008	0.542936	17.9481	0.941284	1.07255
11	85.803	87.441	200.472	88.645	89.701		11	0.00218507	0.00484614	0.188475	0.00680214	0.0085177		11	0.218507	0.484614	18.8475	0.680214	0.85177
12	86.502	87.871	201.239	87.931	89.193		12	0.00332065	0.00554471	0.189721	0.00564218	0.00769241		12	0.332065	0.554471	18.9721	0.564218	0.769241
13	88.929	87.241	203.415	88.341	90.609		13	0.00726352	0.00452122	0.193256	0.00630826	0.00999282		13	0.726352	0.452122	19.3256	0.630826	0.999282
14	87.627	86.937	208.299	88.267	90.038		14	0.00514831	0.00402735	0.20119	0.00618804	0.00906518		14	0.514831	0.402735	20.119	0.618804	0.906518
15	88.071	87.513	211.056	89.357	88.311		15	0.00586962	0.00496311	0.205669	0.00795884	0.00625952		15	0.586962	0.496311	20.5669	0.795884	0.625952
16	86.597	87.326	212.076	88.453	87.904		16	0.00347499	0.00465931	0.207326	0.00649022	0.00559832		16	0.347499	0.465931	20.7326	0.649022	0.559832
17	87.176	87.298	212.852	89.133	88.967		17	0.00441562	0.00461382	0.208587	0.00759493	0.00732525		17	0.441562	0.461382	20.8587	0.759493	0.732525
18	87.907	87.285	215.683	89.755	88.604		18	0.00560319	0.0045927	0.213186	0.00860542	0.00673553		18	0.560319	0.45927	21.3186	0.860542	0.673553
19	86.633	87.026	217.028	88.956	87.544		19	0.00353347	0.00417193	0.215371	0.00730738	0.00501347		19	0.353347	0.417193	21.5371	0.730738	0.501347
20	87.596	87.493	221.627	88.067	88.403		20	0.00509795	0.00493061	0.222843	0.00586313	0.00640899		20	0.509795	0.493061	22.2843	0.586313	0.640899
21	86.185	86.085	222.274	88.555	87.877		21	0.00280566	0.0026432	0.223894	0.00665592	0.00555445		21	0.280566	0.26432	22.3894	0.665592	0.555445
22	86.358	87.736	223.988	89.374	89.207		22	0.00308671	0.00532539	0.226678	0.00798646	0.00771515		22	0.308671	0.532539	22.6678	0.798646	0.771515
23	86.861	87.412	223.471	89.485	87.77		23	0.00390388	0.00479902	0.225838	0.00816679	0.00538062		23	0.390388	0.479902	22.5838	0.816679	0.538062
24	86.41	86.314	225.865	90.246	89.356		24	0.00317119	0.00301523	0.229728	0.0094031	0.00795721		24	0.317119	0.301523	22.9728	0.94031	0.795721
25	86.847	88.114	226.823	88.381	89.559		25	0.00388113	0.00593948	0.231284	0.00637325	0.00828701		25	0.388113	0.593948	23.1284	0.637325	0.828701
26	86.291	87.236	227.765	88.083	87.258		26	0.00297786	0.0045131	0.232814	0.00588912	0.00454884		26	0.297786	0.45131	23.2814	0.588912	0.454884
27	86.509	87.537	232.18	89.142	87.255		27	0.00333202	0.0050021	0.239987	0.00760955	0.00454396		27	0.333202	0.50021	23.9987	0.760955	0.454396
28	86.499	85.911	230.251	88.852	86.965		28	0.00331578	0.00236052	0.236853	0.00713842	0.00407283		28	0.331578	0.236052	23.6853	0.713842	0.407283
29	87.028	86.347	231.841	87.267	88.029		29	0.00417518	0.00306884	0.239436	0.00456346	0.00580139		29	0.417518	0.306884	23.9436	0.456346	0.580139
30	85.95	88.235	232.149	86.63	87.865		30	0.00242388	0.00613606	0.239937	0.0035286	0.00553496		30	0.242388	0.613606	23.9937	0.35286	0.553496
31	85.787	88.452	232.744	89.217	85.886		31	0.00215907	0.00648859	0.240903	0.0077314	0.00231991		31	0.215907	0.648859	24.0903	0.77314	0.231991
32	84.458	88.739	231.977	89.372	86.929		32	0	0.00695485	0.239657	0.00798321	0.00401435		32	0	0.695485	23.9657	0.798321	0.401435
33	85.71	85.838	233.738	88.538	88.409		33	0.00203398	0.00224193	0.242518	0.0066283	0.00641873		33	0.203398	0.224193	24.2518	0.66283	0.641873
34	86.399	87.562	233.43	87.404	87.316		34	0.00315332	0.00504271	0.242018	0.00478603	0.00464306		34	0.315332	0.504271	24.2018	0.478603	0.464306
35	86.589	87.901	234.011	89.619	86.116		35	0.00346199	0.00559344	0.242961	0.00838448	0.00269356		35	0.346199	0.559344	24.2961	0.838448	0.269356
36	86.295	86.965	233.112	87.424	87.556		36	0.00298436	0.00407283	0.241501	0.00481852	0.00503296		36	0.298436	0.407283	24.1501	0.481852	0.503296
37	86.205	86.523	234.746	89.148	86.74		37	0.00283815	0.00335477	0.244156	0.0076193	0.0037073		37	0.283815	0.335477	24.4156	0.76193	0.37073
38	85.988	87.41	233.762	89.104	87.368		38	0.00248561	0.00479577	0.242557	0.00754782	0.00472754		38	0.248561	0.479577	24.2557	0.754782	0.472754
39	85.883	87.844	234.571	90.172	86.381		39	0.00231503	0.00550084	0.243871	0.00928288	0.00312408		39	0.231503	0.550084	24.3871	0.928288	0.312408
40	85.177	87.713	235.725	88.577	87.132		40	0.00116808	0.00528802	0.245746	0.00669166	0.00434414		40	0.116808	0.528802	24.5746	0.669166	0.434414
41	84.62	87.719	234.812	89.309	86.322		41	0.000263183	0.00529777	0.244263	0.00788086	0.00302823		41	0.0263183	0.529777	24.4263	0.788086	0.302823
42	85.661	87.406	233.319	89.038	85.226		42	0.00195438	0.00478928	0.241837	0.0074406	0.00124768		42	0.195438	0.478928	24.1837	0.74406	0.124768
43	85.149	86.388	231.563	88.646	85.392		43	0.00112259	0.00313545	0.238985	0.00680376	0.00151736		43	0.112259	0.313545	23.8985	0.680376	0.151736
44	87.268	87.628	232.212	88.597	85.43		44	0.00456508	0.00514993	0.240039	0.00672416	0.0015791		44	0.456508	0.514993	24.0039	0.672416	0.15791
45	84.272	87.859	234.748	89.103	85.579		45	-0.000302173	0.00552521	0.244159	0.0075462	0.00182116		45	-0.0302173	0.552521	24.4159	0.75462	0.182116
46	85.255	86.351	233.499	88.573	84.659		46	0.00129479	0.00307534	0.24213	0.00668517	0.000326541		46	0.129479	0.307534	24.213	0.668517	0.0326541
47	84.606	87.084	233.681	89.44	84.056		47	0.000240439	0.00426616	0.242425	0.00809368	-0.000653083		47	0.0240439	0.426616	24.2425	0.809368	-0.0653083
48	84.641	87.171	233.672	89.647	84.717		48	0.000297299	0.0044075	0.242411	0.00842997	0.000420767		48	0.0297299	0.44075	24.2411	0.842997	0.0420767
49	84.747	87.228	233.899	91.251	84.632		49	0.000469505	0.0045001	0.24278	0.0110358	0.000282678		49	0.0469505	0.45001	24.278	1.10358	0.0282678
50	84.35	88.241	233.386	90.148	84.383		50	-0.000175455	0.0061458	0.241946	0.00924389	-0.000121844		50	-0.0175455	0.61458	24.1946	0.924389	-0.0121844
51	84.532	86.932	234.178	89.309	84.148		51	0.000120219	0.00401922	0.243233	0.00788086	-0.000503621		51	0.0120219	0.401922	24.3233	0.788086	-0.0503621
52	85.724	87.572	231.754	88.335	85.338		52	0.00205672	0.00505896	0.239295	0.00629851	0.00142963		52	0.205672	0.505896	23.9295	0.629851	0.142963
53	84.024	88.131	229.904	88.857	83.252		53	-0.00070507	0.0059671	0.236289	0.00714655	-0.00195925		53	-0.070507	0.59671	23.6289	0.714655	-0.195925
54	83.467	87.241	229.081	89.051	83.506		54	-0.00160996	0.00452122	0.234952	0.00746172	-0.0015466		54	-0.160996	0.452122	23.4952	0.746172	-0.15466
55	84.458	87.147	233.37	89.007	83.437		55	0	0.00436851	0.24192	0.00739023	-0.0016587		55	0	0.436851	24.192	0.739023	-0.16587
56	84.58	89.306	231.779	90.409	81.402		56	0.000198199	0.00787599	0.239335	0.0096679	-0.00496473		56	0.0198199	0.787599	23.9335	0.96679	-0.496473
57	84.663	88.894	230.221	90.154	83.489		57	0.00033304	0.00720666	0.236804	0.00925363	-0.00157422		57	0.033304	0.720666	23.6804	0.925363	-0.157422
58	84.364	87.075	229.253	91.965	83.331		58	-0.000152711	0.00425154	0.235232	0.0121958	-0.00183091		58	-0.0152711	0.425154	23.5232	1.21958	-0.183091
59	84.756	87.491	232.081	90.126	82.159		59	0.000484126	0.00492736	0.239826	0.00920815	-0.00373492		59	0.0484126	0.492736	23.9826	0.920815	-0.373492
60	83.106	87.756	229.474	90.624	81.554		60	-0.00219644	0.00535788	0.235591	0.0100172	-0.00471779		60	-0.219644	0.535788	23.5591	1.00172	-0.471779

## Sheet: Figure D
	Raw Data							Ratio to MAX DATA							% MAX DATA
minutes	sQb	sQb, GST-PX	sQb, HOPS	GST-PX	HOPS		minutes	sQb	sQb, GST-PX	sQb, HOPS	GST-PX	HOPS		minutes	sQb	sQb, GST-PX	sQb, HOPS	GST-PX	HOPS
0	90.85	89.682	97.766	88.42	87.024		0	0.0157172	0.0138299	0.0268923	0.0117907	0.00953501		0	1.57172	1.38299	2.68923	1.17907	0.953501
1	87.768	87.907	119.098	86.686	86.149		1	0.0107372	0.0109618	0.0613611	0.00898886	0.00812116		1	1.07372	1.09618	6.13611	0.898886	0.812116
2	87.63	89.683	132.493	86.681	85.671		2	0.0105142	0.0138315	0.0830052	0.00898078	0.00734879		2	1.05142	1.38315	8.30052	0.898078	0.734879
3	87.287	87.516	141.215	87.062	86.72		3	0.00995998	0.01033	0.0970985	0.00959641	0.0090438		3	0.995998	1.033	9.70985	0.959641	0.90438
4	86.838	86.745	150.949	87.294	86.188		4	0.00923447	0.0090842	0.112827	0.00997129	0.00818418		4	0.923447	0.90842	11.2827	0.997129	0.818418
5	86.795	85.826	156.803	86.489	87.46		5	0.00916499	0.00759925	0.122286	0.00867054	0.0102395		5	0.916499	0.759925	12.2286	0.867054	1.02395
6	85.312	87.635	162.948	87.473	86.938		6	0.00676871	0.0105223	0.132215	0.0102605	0.00939605		6	0.676871	1.05223	13.2215	1.02605	0.939605
7	86.715	85.838	167.958	85.66	84.628		7	0.00903572	0.00761864	0.140311	0.00733102	0.00566348		7	0.903572	0.761864	14.0311	0.733102	0.566348
8	87.296	87.29	170.704	86.931	85.453		8	0.00997452	0.00996482	0.144748	0.00938474	0.00699654		8	0.997452	0.996482	14.4748	0.938474	0.699654
9	86.165	85.614	172.381	86.784	86.833		9	0.00814701	0.00725669	0.147457	0.00914721	0.00922639		9	0.814701	0.725669	14.7457	0.914721	0.922639
10	87.261	85.395	177.5	87.068	85.99		10	0.00991796	0.00690283	0.155729	0.00960611	0.00786424		10	0.991796	0.690283	15.5729	0.960611	0.786424
11	85.443	85.642	180.595	86.189	85.705		11	0.00698039	0.00730194	0.16073	0.00818579	0.00740373		11	0.698039	0.730194	16.073	0.818579	0.740373
12	85.392	86.99	183.149	86.847	84.995		12	0.00689798	0.00948007	0.164857	0.00924901	0.00625649		12	0.689798	0.948007	16.4857	0.924901	0.625649
13	87.108	88.11	186.363	85.355	84.716		13	0.00967074	0.0112898	0.17005	0.00683819	0.00580568		13	0.967074	1.12898	17.005	0.683819	0.580568
14	86.01	85.417	187.856	85.668	83.835		14	0.00789656	0.00693837	0.172462	0.00734395	0.00438213		14	0.789656	0.693837	17.2462	0.734395	0.438213
15	85.865	84.753	189.831	85.313	84.278		15	0.00766227	0.00586546	0.175654	0.00677033	0.00509794		15	0.766227	0.586546	17.5654	0.677033	0.509794
16	85.704	86.153	189.483	85.245	84.5		16	0.00740212	0.00812762	0.175091	0.00666045	0.00545666		16	0.740212	0.812762	17.5091	0.666045	0.545666
17	85.311	86.981	193.083	84.653	84.261		17	0.0067671	0.00946553	0.180908	0.00570388	0.00507047		17	0.67671	0.946553	18.0908	0.570388	0.507047
18	85.808	85.071	192.496	86.752	84.241		18	0.00757016	0.0063793	0.17996	0.00909551	0.00503816		18	0.757016	0.63793	17.996	0.909551	0.503816
19	85.663	86.2	195.457	85.251	84.823		19	0.00733587	0.00820357	0.184744	0.00667015	0.00597857		19	0.733587	0.820357	18.4744	0.667015	0.597857
20	85.48	85.658	197.574	85.514	85.085		20	0.00704017	0.00732779	0.188165	0.00709511	0.00640192		20	0.704017	0.732779	18.8165	0.709511	0.640192
21	85.822	85.279	197.946	84.991	85.902		21	0.00759278	0.00671539	0.188766	0.00625003	0.00772205		21	0.759278	0.671539	18.8766	0.625003	0.772205
22	84.675	87.014	201.328	85.581	84.285		22	0.00573943	0.00951885	0.194231	0.00720337	0.00510925		22	0.573943	0.951885	19.4231	0.720337	0.510925
23	85.592	86.585	201.968	86.675	86.392		23	0.00722114	0.00882566	0.195265	0.00897109	0.00851381		23	0.722114	0.882566	19.5265	0.897109	0.851381
24	84.759	84.927	202.926	85.445	84.626		24	0.00587516	0.00614662	0.196813	0.00698362	0.00566025		24	0.587516	0.614662	19.6813	0.698362	0.566025
25	85.901	86.549	202.388	85.023	82.221		25	0.00772044	0.00876749	0.195944	0.00630174	0.00177418		25	0.772044	0.876749	19.5944	0.630174	0.177418
26	84.853	85.978	203.633	87.038	85.841		26	0.00602705	0.00784485	0.197955	0.00955763	0.00762349		26	0.602705	0.784485	19.7955	0.955763	0.762349
27	85.434	85.547	206.339	85.608	83.895		27	0.00696584	0.00714843	0.202328	0.007247	0.00447908		27	0.696584	0.714843	20.2328	0.7247	0.447908
28	85.653	84.746	208.031	83.743	82.832		28	0.00731971	0.00585415	0.205062	0.00423347	0.00276145		28	0.731971	0.585415	20.5062	0.423347	0.276145
29	85.368	85.626	208.66	86	84.794		29	0.0068592	0.00727608	0.206078	0.0078804	0.00593171		29	0.68592	0.727608	20.6078	0.78804	0.593171
30	84.785	84.725	210.435	84.787	82.919		30	0.00591717	0.00582022	0.208946	0.0059204	0.00290203		30	0.591717	0.582022	20.8946	0.59204	0.290203
31	83.923	85.778	211.49	85.426	83.522		31	0.00452432	0.00752169	0.210651	0.00695292	0.00387638		31	0.452432	0.752169	21.0651	0.695292	0.387638
32	83.914	85.747	215.46	84.769	84.016		32	0.00450978	0.0074716	0.217066	0.00589132	0.0046746		32	0.450978	0.74716	21.7066	0.589132	0.46746
33	86.671	85.395	213.316	86.355	83.348		33	0.00896462	0.00690283	0.213601	0.00845402	0.00359522		33	0.896462	0.690283	21.3601	0.845402	0.359522
34	84.628	85.867	214.418	84.779	83.363		34	0.00566348	0.0076655	0.215382	0.00590747	0.00361946		34	0.566348	0.76655	21.5382	0.590747	0.361946
35	85.2	85.712	216.56	85.624	84.773		35	0.00658774	0.00741504	0.218843	0.00727285	0.00589778		35	0.658774	0.741504	21.8843	0.727285	0.589778
36	84.345	84.652	221.675	85.204	83.597		36	0.0052062	0.00570226	0.227108	0.0065942	0.00399756		36	0.52062	0.570226	22.7108	0.65942	0.399756
37	83.831	85.448	219.044	83.802	82.638		37	0.00437567	0.00698846	0.222857	0.00432881	0.00244798		37	0.437567	0.698846	22.2857	0.432881	0.244798
38	83.209	85.495	217.792	83.86	81.123		38	0.00337062	0.00706441	0.220834	0.00442253	0		38	0.337062	0.706441	22.0834	0.442253	0
39	84.289	85.579	219.529	86.342	82.43		39	0.00511572	0.00720014	0.223641	0.00843302	0.00211189		39	0.511572	0.720014	22.3641	0.843302	0.211189
40	83.487	86.452	221.733	85.579	83.547		40	0.00381982	0.00861076	0.227202	0.00720014	0.00391677		40	0.381982	0.861076	22.7202	0.720014	0.391677
41	83.458	85.145	219.779	85.707	81.998		41	0.00377296	0.00649887	0.224045	0.00740696	0.00141385		41	0.377296	0.649887	22.4045	0.740696	0.141385
42	83.246	84.954	220.742	86.063	83.208		42	0.00343041	0.00619024	0.225601	0.0079822	0.00336901		42	0.343041	0.619024	22.5601	0.79822	0.336901
43	82.097	87.115	222.739	83.881	83.563		43	0.00157382	0.00968205	0.228827	0.00445646	0.00394263		43	0.157382	0.968205	22.8827	0.445646	0.394263
44	83.95	85.603	219.177	85.839	83.113		44	0.00456795	0.00723892	0.223072	0.00762025	0.0032155		44	0.456795	0.723892	22.3072	0.762025	0.32155
45	82.961	85.48	221.171	85.04	83.235		45	0.0029699	0.00704017	0.226294	0.00632921	0.00341263		45	0.29699	0.704017	22.6294	0.632921	0.341263
46	83.314	85.32	222.158	84.263	82.083		46	0.00354028	0.00678164	0.227889	0.00507371	0.0015512		46	0.354028	0.678164	22.7889	0.507371	0.15512
47	84.847	83.889	224.231	86.769	82.677		47	0.00601735	0.00446939	0.231238	0.00912298	0.002511		47	0.601735	0.446939	23.1238	0.912298	0.2511
48	82.49	85.307	222.288	85.784	81.841		48	0.00220884	0.00676063	0.228099	0.00753138	0.00116017		48	0.220884	0.676063	22.8099	0.753138	0.116017
49	82.533	85.588	222.87	85.014	84.646		49	0.00227832	0.00721468	0.229039	0.00628719	0.00569257		49	0.227832	0.721468	22.9039	0.628719	0.569257
50	83.631	85.871	223.535	86.046	81.988		50	0.0040525	0.00767196	0.230114	0.00795473	0.00139769		50	0.40525	0.767196	23.0114	0.795473	0.139769
51	83.138	86.79	221.482	85.013	81.948		51	0.0032559	0.00915691	0.226796	0.00628558	0.00133306		51	0.32559	0.915691	22.6796	0.628558	0.133306
52	81.866	85.526	219.981	86.339	81.53		52	0.00120056	0.0071145	0.224371	0.00842817	0.000657643		52	0.120056	0.71145	22.4371	0.842817	0.0657643
53	82.902	85.864	220.595	84.382	81.622		53	0.00287456	0.00766065	0.225363	0.00526599	0.000806299		53	0.287456	0.766065	22.5363	0.526599	0.0806299
54	82.582	85.939	219.627	84.908	81.479		54	0.0023575	0.00778184	0.223799	0.00611592	0.000575235		54	0.23575	0.778184	22.3799	0.611592	0.0575235
55	82.65	86.136	220.902	83.819	81.622		55	0.00246737	0.00810016	0.225859	0.00435628	0.000806299		55	0.246737	0.810016	22.5859	0.435628	0.0806299
56	82.753	85.534	219.781	84.711	81.648		56	0.0026338	0.00712743	0.224048	0.0057976	0.000848311		56	0.26338	0.712743	22.4048	0.57976	0.0848311
57	81.762	87.095	217.628	85.892	81.302		57	0.00103252	0.00964974	0.220569	0.00770589	0.000289234		57	0.103252	0.964974	22.0569	0.770589	0.0289234
58	82.812	86.3	217.629	85.028	81.506		58	0.00272914	0.00836515	0.22057	0.00630982	0.000618863		58	0.272914	0.836515	22.057	0.630982	0.0618863
59	83.12	88.15	217.597	85.629	82.501		59	0.00322681	0.0113544	0.220519	0.00728093	0.00222661		59	0.322681	1.13544	22.0519	0.728093	0.222661
60	82.656	86.26	217.52	86.152	81.293		60	0.00247707	0.00830052	0.220394	0.00812601	0.000274691		60	0.247707	0.830052	22.0394	0.812601	0.0274691

## Sheet: Figure E
minutes	Qc	Qc, GST-PX	Qc, HOPS	GST-PX	HOPS		minutes	Qc	Qc, GST-PX	Qc, HOPS	GST-PX	HOPS		minutes	Qc	Qc, GST-PX	Qc, HOPS	GST-PX	HOPS
0	88.763	89.31	99.981	88.405	86.396		0	0.0100527	0.0109386	0.0282212	0.00947292	0.00621919		0	1.00527	1.09386	2.82212	0.947292	0.621919
1	88.513	90.447	123.202	87.699	87.957		1	0.00964784	0.0127801	0.0658295	0.0083295	0.00874735		1	0.964784	1.27801	6.58295	0.83295	0.874735
2	86.346	90.63	138.894	86.364	87.71		2	0.00613821	0.0130765	0.0912439	0.00616736	0.00834732		2	0.613821	1.30765	9.12439	0.616736	0.834732
3	89.884	89.76	153.588	85.832	86.726		3	0.0118683	0.0116675	0.115042	0.00530574	0.00675365		3	1.18683	1.16675	11.5042	0.530574	0.675365
4	89.363	89.699	160.769	87.021	87.797		4	0.0110245	0.0115687	0.126672	0.00723143	0.00848822		4	1.10245	1.15687	12.6672	0.723143	0.848822
5	87.726	88.538	166.636	85.322	86.041		5	0.00837323	0.00968833	0.136174	0.00447976	0.00564424		5	0.837323	0.968833	13.6174	0.447976	0.564424
6	87.103	87.559	174.706	87.201	86.788		6	0.00736423	0.00810276	0.149244	0.00752295	0.00685406		6	0.736423	0.810276	14.9244	0.752295	0.685406
7	88.891	88.288	180.186	87.417	84.817		7	0.01026	0.00928343	0.15812	0.00787278	0.00366187		7	1.026	0.928343	15.812	0.787278	0.366187
8	87.204	88.058	185.983	86.987	86.143		8	0.00752781	0.00891093	0.167508	0.00717636	0.00580943		8	0.752781	0.891093	16.7508	0.717636	0.580943
9	88.651	88.191	191.059	86.587	85.621		9	0.00987134	0.00912633	0.175729	0.00652853	0.00496401		9	0.987134	0.912633	17.5729	0.652853	0.496401
10	85.741	88.957	194.471	86.06	85.807		10	0.00515836	0.0103669	0.181255	0.00567501	0.00526525		10	0.515836	1.03669	18.1255	0.567501	0.526525
11	86.884	89.537	197.026	86.647	86.112		11	0.00700954	0.0113063	0.185393	0.0066257	0.00575923		11	0.700954	1.13063	18.5393	0.66257	0.575923
12	88.362	90.445	202.47	86.661	85.817		12	0.00940328	0.0127769	0.19421	0.00664838	0.00528145		12	0.940328	1.27769	19.421	0.664838	0.528145
13	86.712	88.373	207.068	86.339	85.692		13	0.00673097	0.0094211	0.201657	0.00612687	0.005079		13	0.673097	0.94211	20.1657	0.612687	0.5079
14	88.92	89.769	207.622	86.562	85.174		14	0.010307	0.011682	0.202554	0.00648804	0.00424006		14	1.0307	1.1682	20.2554	0.648804	0.424006
15	87.912	90.151	209.572	87.767	85.88		15	0.00867447	0.0123007	0.205713	0.00843963	0.00538348		15	0.867447	1.23007	20.5713	0.843963	0.538348
16	87.921	90.302	211.272	87.025	85.501		16	0.00868905	0.0125453	0.208466	0.0072379	0.00476966		16	0.868905	1.25453	20.8466	0.72379	0.476966
17	86.819	90.669	214.734	87.739	84.965		17	0.00690427	0.0131397	0.214073	0.00839428	0.00390157		17	0.690427	1.31397	21.4073	0.839428	0.390157
18	87.285	90.984	216.137	86.35	85.3		18	0.00765899	0.0136498	0.216345	0.00614469	0.00444413		18	0.765899	1.36498	21.6345	0.614469	0.444413
19	86.907	92.025	215.986	87.465	85.826		19	0.00704679	0.0153358	0.216101	0.00795052	0.00529603		19	0.704679	1.53358	21.6101	0.795052	0.529603
20	86.641	93.418	221.449	85.083	84.93		20	0.00661598	0.0175919	0.224948	0.00409268	0.00384488		20	0.661598	1.75919	22.4948	0.409268	0.384488
21	87.892	92.309	222.588	86.027	86.017		21	0.00864208	0.0157958	0.226793	0.00562156	0.00560537		21	0.864208	1.57958	22.6793	0.562156	0.560537
22	88.329	92.856	223.034	86.805	85.262		22	0.00934984	0.0166817	0.227515	0.0068816	0.00438258		22	0.934984	1.66817	22.7515	0.68816	0.438258
23	86.95	93.913	226.273	85.993	84.417		23	0.00711643	0.0183936	0.232761	0.0055665	0.00301404		23	0.711643	1.83936	23.2761	0.55665	0.301404
24	87.847	95.647	226.933	85.8	85.078		24	0.0085692	0.0212019	0.23383	0.00525392	0.00408458		24	0.85692	2.12019	23.383	0.525392	0.408458
25	88.361	96.103	229.202	86.606	84.083		25	0.00940166	0.0219405	0.237505	0.0065593	0.0024731		25	0.940166	2.19405	23.7505	0.65593	0.24731
26	88.149	95.843	228.352	85.988	85.519		26	0.00905831	0.0215194	0.236128	0.0055584	0.00479882		26	0.905831	2.15194	23.6128	0.55584	0.479882
27	87.133	96.368	230.812	86.232	85.137		27	0.00741282	0.0223696	0.240112	0.00595358	0.00418014		27	0.741282	2.23696	24.0112	0.595358	0.418014
28	86.888	95.73	231.371	85.707	85.321		28	0.00701602	0.0213363	0.241018	0.0051033	0.00447814		28	0.701602	2.13363	24.1018	0.51033	0.447814
29	88.114	97.103	231.844	85.83	85.137		29	0.00900163	0.02356	0.241784	0.00530251	0.00418014		29	0.900163	2.356	24.1784	0.530251	0.418014
30	87.257	99.823	233.746	85.721	85.86		30	0.00761365	0.0279653	0.244864	0.00512597	0.00535109		30	0.761365	2.79653	24.4864	0.512597	0.535109
31	87.279	98.452	237.438	86.423	84.63		31	0.00764928	0.0257448	0.250844	0.00626292	0.00335901		31	0.764928	2.57448	25.0844	0.626292	0.335901
32	87.539	99.352	234.663	87.989	84.061		32	0.00807037	0.0272025	0.246349	0.00879918	0.00243747		32	0.807037	2.72025	24.6349	0.879918	0.243747
33	87.276	101.512	240.214	86.005	84.202		33	0.00764442	0.0307008	0.25534	0.00558593	0.00266583		33	0.764442	3.07008	25.534	0.558593	0.266583
34	87.306	101.655	239.012	86.083	83.981		34	0.00769301	0.0309324	0.253393	0.00571226	0.0023079		34	0.769301	3.09324	25.3393	0.571226	0.23079
35	87.405	101.36	239.174	85.206	82.556		35	0.00785334	0.0304546	0.253655	0.00429189	0		35	0.785334	3.04546	25.3655	0.429189	0
36	86.493	102.926	240.872	84.559	84.525		36	0.00637629	0.0329908	0.256405	0.00324402	0.00318895		36	0.637629	3.29908	25.6405	0.324402	0.318895
37	86.501	104.635	239.739	86.491	83.857		37	0.00638924	0.0357587	0.25457	0.00637305	0.00210707		37	0.638924	3.57587	25.457	0.637305	0.210707
38	86.338	105.23	241.382	86.926	85.122		38	0.00612525	0.0367224	0.257231	0.00707756	0.00415584		38	0.612525	3.67224	25.7231	0.707756	0.415584
39	87.045	104.675	243.529	85.356	83.322		39	0.00727029	0.0358235	0.260709	0.00453482	0.0012406		39	0.727029	3.58235	26.0709	0.453482	0.12406
40	86.818	106.011	242.879	86.89	84.179		40	0.00690265	0.0379873	0.259656	0.00701926	0.00262858		40	0.690265	3.79873	25.9656	0.701926	0.262858
41	86.27	106.03	242.589	86.319	83.174		41	0.00601512	0.038018	0.259186	0.00609448	0.0010009		41	0.601512	3.8018	25.9186	0.609448	0.10009
42	86.793	107.642	242.506	85.43	84.402		42	0.00686216	0.0406288	0.259052	0.00465467	0.00298974		42	0.686216	4.06288	25.9052	0.465467	0.298974
43	87	106.783	244.068	86.551	83.959		43	0.00719741	0.0392376	0.261582	0.00647022	0.00227227		43	0.719741	3.92376	26.1582	0.647022	0.227227
44	87.146	108.425	245.461	85.987	83.273		44	0.00743387	0.0418969	0.263838	0.00555678	0.00116124		44	0.743387	4.18969	26.3838	0.555678	0.116124
45	85.413	109.47	245.693	87.113	83.652		45	0.00462714	0.0435894	0.264213	0.00738043	0.00177506		45	0.462714	4.35894	26.4213	0.738043	0.177506
46	85.418	108.262	247.295	87.119	84.509		46	0.00463524	0.0416329	0.266808	0.00739014	0.00316304		46	0.463524	4.16329	26.6808	0.739014	0.316304
47	86.74	110.58	245.921	85.88	84.327		47	0.00677632	0.0453871	0.264583	0.00538348	0.00286828		47	0.677632	4.53871	26.4583	0.538348	0.286828
48	85.171	109.989	244.368	85.173	83.624		48	0.0042352	0.0444299	0.262067	0.00423844	0.00172971		48	0.42352	4.44299	26.2067	0.423844	0.172971
49	85.056	111.98	246.795	86.121	82.875		49	0.00404895	0.0476545	0.265998	0.0057738	0.000516646		49	0.404895	4.76545	26.5998	0.57738	0.0516646
50	85.709	113.936	244.173	84.949	83.74		50	0.00510654	0.0508224	0.261752	0.00387566	0.00191758		50	0.510654	5.08224	26.1752	0.387566	0.191758
51	86.02	113.487	244.999	85.861	83.297		51	0.00561023	0.0500952	0.263089	0.00535271	0.00120011		51	0.561023	5.00952	26.3089	0.535271	0.120011
52	86.002	113.594	243.664	85.928	83.284		52	0.00558107	0.0502685	0.260927	0.00546122	0.00117905		52	0.558107	5.02685	26.0927	0.546122	0.117905
53	86.447	113.9	244.378	85.295	83.337		53	0.00630179	0.0507641	0.262084	0.00443603	0.00126489		53	0.630179	5.07641	26.2084	0.443603	0.126489
54	85.92	114.094	245.385	85.118	83.172		54	0.00544827	0.0510783	0.263715	0.00414936	0.000997661		54	0.544827	5.10783	26.3715	0.414936	0.0997661
55	86.565	116.359	246.733	86.972	84.152		55	0.0064929	0.0547467	0.265898	0.00715207	0.00258485		55	0.64929	5.47467	26.5898	0.715207	0.258485
56	86.373	116.814	244.923	84.333	82.307		56	0.00618194	0.0554836	0.262966	0.00287799	-0.000403275		56	0.618194	5.54836	26.2966	0.287799	-0.0403275
57	85.691	119.442	244.289	84.48	82.255		57	0.00507738	0.0597398	0.26194	0.00311607	-0.000487494		57	0.507738	5.97398	26.194	0.311607	-0.0487494
58	86.666	117.639	243.867	85.869	82.357		58	0.00665647	0.0568197	0.261256	0.00536567	-0.000322296		58	0.665647	5.68197	26.1256	0.536567	-0.0322296
59	86.313	118.523	242.454	86.715	81.364		59	0.00608476	0.0582514	0.258968	0.00673583	-0.00193054		59	0.608476	5.82514	25.8968	0.673583	-0.193054
60	86.191	118.568	239.515	86.265	83.457		60	0.00588717	0.0583243	0.254208	0.00600702	0.00145924		60	0.588717	5.83243	25.4208	0.600702	0.145924
