# Supplementary material for: HOPS recognizes each SNARE, assembling ternary trans-complexes for rapid fusion upon engagement with the 4th SNARE
Source: eLife. 2020 Jan 21;9:e53559. doi: 10.7554/eLife.53559 (PMC6994237; doi:10.7554/eLife.53559)
Supplement: Figure 3—source data 1. [file elife-53559-fig3-data1.xlsx]

## Sheet: Figure A
	Ratio to MAX DATA							%/MAX DATA
Time (min)	a	b	c	d	e		Time (min)	a	b	c	d	e
0	0.00565331	0.00423554	0.00325435	0.0583712	0.00661297		0	0.565331	0.423554	0.325435	5.83712	0.661297
1	0.00360214	-0.000273786	0.00166936	0.083854	0.00500619		1	0.360214	-0.0273786	0.166936	8.3854	0.500619
2	0.00683873	0.00132009	0.00192982	0.104392	0.00481284		2	0.683873	0.132009	0.192982	10.4392	0.481284
3	0.00408459	0.000880555	0.00456705	0.119164	0.0028928		3	0.408459	0.0880555	0.456705	11.9164	0.28928
4	0.00722351	0.00467656	0.00333131	0.136082	0.00309964		4	0.722351	0.467656	0.333131	13.6082	0.309964
5	0.00427402	0.00280594	0.0020645	0.149314	0.00505116		5	0.427402	0.280594	0.20645	14.9314	0.505116
6	0.00447381	0.00173299	0.00266386	0.163774	0.00511261		6	0.447381	0.173299	0.266386	16.3774	0.511261
7	0.00490595	0.000538693	0.00363618	0.176912	0.00305018		7	0.490595	0.0538693	0.363618	17.6912	0.305018
8	0.00665818	0.000803599	0.000649687	0.182313	0.00653053		8	0.665818	0.0803599	0.0649687	18.2313	0.653053
9	0.00509242	0.00219029	0.00186471	0.199629	0.00659798		9	0.509242	0.219029	0.186471	19.9629	0.659798
10	0.00375901	0.0020201	0.00343343	0.210068	0.00802639		10	0.375901	0.20201	0.343343	21.0068	0.802639
11	0.00675438	0.00246999	0.00559856	0.214379	0.00352232		11	0.675438	0.246999	0.559856	21.4379	0.352232
12	0.00394104	0.00310044	0.00297465	0.222379	0.00415184		12	0.394104	0.310044	0.297465	22.2379	0.415184
13	0.0043347	0.00333131	0.00442054	0.23095	0.00556227		13	0.43347	0.333131	0.442054	23.095	0.556227
14	0.00566071	0.00142221	0.000648207	0.239295	0.00301571		14	0.566071	0.142221	0.0648207	23.9295	0.301571
15	0.00714508	0.00404759	0.00182623	0.243504	0.00799492		15	0.714508	0.404759	0.182623	24.3504	0.799492
16	0.00658863	0.00406535	0.00271714	0.246344	0.00522652		16	0.658863	0.406535	0.271714	24.6344	0.522652
17	0.00713028	0.0031996	0.00332687	0.255394	0.00592049		17	0.713028	0.31996	0.332687	25.5394	0.592049
18	0.00345118	0.00201122	0.0043051	0.257554	0.00411737		18	0.345118	0.201122	0.43051	25.7554	0.411737
19	0.00707848	0.00371609	0.00569327	0.264257	0.00765168		19	0.707848	0.371609	0.569327	26.4257	0.765168
20	0.00437466	0.00509982	0.00319368	0.269589	0.00424477		20	0.437466	0.509982	0.319368	26.9589	0.424477
21	0.00614909	0.00295985	0.000846517	0.271503	0.00507664		21	0.614909	0.295985	0.0846517	27.1503	0.507664
22	0.00326027	0.00390848	0.00314336	0.275245	0.00546634		22	0.326027	0.390848	0.314336	27.5245	0.546634
23	0.00383153	0.00545352	0.00202158	0.284331	0.00544835		23	0.383153	0.545352	0.202158	28.4331	0.544835
24	0.00456557	0.00149176	0.00425774	0.282942	0.00556227		24	0.456557	0.149176	0.425774	28.2942	0.556227
25	0.00706664	0.00487931	0.0032292	0.281004	0.00549482		25	0.706664	0.487931	0.32292	28.1004	0.549482
26	0.00360214	0.00426366	0.0035977	0.28217	0.00705813		26	0.360214	0.426366	0.35977	28.217	0.705813
27	0.00417339	0.00293025	0.00410975	0.290309	0.00560873		27	0.417339	0.293025	0.410975	29.0309	0.560873
28	0.00363322	0.0062068	0.00616981	0.291806	0.00705363		28	0.363322	0.62068	0.616981	29.1806	0.705363
29	0.00650575	0.00370277	0.00431842	0.297318	0.00596396		29	0.650575	0.370277	0.431842	29.7318	0.596396
30	0.0047698	0.00319812	0.00318184	0.301413	0.00668341		30	0.47698	0.319812	0.318184	30.1413	0.668341
30.5	0.00382561	0.00277782	0.00318628	0.318811	0.203355		30.5	0.382561	0.277782	0.318628	31.8811	20.3355
31	0.00566663	0.00325731	-0.000578651	0.318332	0.242973		31	0.566663	0.325731	-0.0578651	31.8332	24.2973
31.5	0.00662266	0.00320552	0.00232348	0.318428	0.258024		31.5	0.662266	0.320552	0.232348	31.8428	25.8024
32	0.00294061	0.000910154	0.00356514	0.318089	0.26859		32	0.294061	0.0910154	0.356514	31.8089	26.859
32.5	0.00461441	0.001585	0.00221101	0.320754	0.269442		32.5	0.461441	0.1585	0.221101	32.0754	26.9442
33	0.00539877	0.00342307	0.0071362	0.319464	0.278617		33	0.539877	0.342307	0.71362	31.9464	27.8617

## Sheet: Figure C
Sample	072619_sample	080119_sample a	080119_sample b	080819_sample a	080819_sample b	080919_sample	Average	Stdev
a	0.0448444	0.194925	0.0519604	0.0736633	0.0334139	0.0693566	0.0780273	0.0592118
b	0.105349	0.221061	0.212092	0.271644	0.209643	0.242748	0.210423	0.0564802
c	0.477629	0.541722	0.446305	0.532693	0.652305	0.411398	0.510342	0.0855552
d	1	1	1	1	1	1	1	0
e	0.782184	0.924159	0.842384	0.786211	0.864805	0.713369	0.818852	0.0738804
f	0.0236933	0.000475195	0.000433727	0.00786294	0.000293105	0	0.00545971	0.00943237
