# Supplementary material for: HOPS recognizes each SNARE, assembling ternary trans-complexes for rapid fusion upon engagement with the 4th SNARE
Source: eLife. 2020 Jan 21;9:e53559. doi: 10.7554/eLife.53559 (PMC6994237; doi:10.7554/eLife.53559)
Supplement: Figure 4—source data 1. [file elife-53559-fig4-data1.xlsx]

## Sheet: Figure A
	Ratio to MAX DATA								% MAX DATA
minutes	a	b	c	d	e	f		minutes	a	b	c	d	e	f
0	0.0161531	0.0227924	0.0185429	0.00409366	0	0.00863041		0	1.61531	2.27924	1.85429	0.409366	0	0.863041
1	0.0526658	0.0955606	0.0612734	-0.000108631	-0.000781854	0.00900776		1	5.26658	9.55606	6.12734	-0.0108631	-0.0781854	0.900776
2	0.0779138	0.147986	0.0863356	0.00100912	0.000397359	0.00883767		2	7.79138	14.7986	8.63356	0.100912	0.0397359	0.883767
3	0.092153	0.182299	0.109297	0.00167663	0.000706099	0.00708814		3	9.2153	18.2299	10.9297	0.167663	0.0706099	0.708814
4	0.106301	0.206495	0.121966	0.000507419	0.000974816	0.00532147		4	10.6301	20.6495	12.1966	0.0507419	0.0974816	0.532147
5	0.116586	0.229615	0.139203	0.00138218	-0.000997686	0.00362912		5	11.6586	22.9615	13.9203	0.138218	-0.0997686	0.362912
6	0.127276	0.241341	0.150858	0.00107201	-0.00125783	0.00673509		6	12.7276	24.1341	15.0858	0.107201	-0.125783	0.673509
7	0.133484	0.248264	0.162447	0.000474544	-0.00135931	0.00577886		7	13.3484	24.8264	16.2447	0.0474544	-0.135931	0.577886
8	0.140704	0.268256	0.167997	0.000414511	-9.14784e-05	0.00776423		8	14.0704	26.8256	16.7997	0.0414511	-0.00914784	0.776423
9	0.148043	0.267064	0.175984	0.000940512	-0.00253281	0.00500701		9	14.8043	26.7064	17.5984	0.0940512	-0.253281	0.500701
10	0.155399	0.277011	0.186243	0.000737544	-0.00123782	0.00605758		10	15.5399	27.7011	18.6243	0.0737544	-0.123782	0.605758
11	0.161424	0.280804	0.192824	-0.000251565	0.00113919	0.00558447		11	16.1424	28.0804	19.2824	-0.0251565	0.113919	0.558447
12	0.169354	0.2831	0.199707	0.00116778	0.000178669	0.00420229		12	16.9354	28.31	19.9707	0.116778	0.0178669	0.420229
13	0.168659	0.28413	0.204233	0.00107916	-0.000365913	0.00653927		13	16.8659	28.413	20.4233	0.107916	-0.0365913	0.653927
14	0.176705	0.289839	0.210452	0.000147223	-0.000939083	0.005503		14	17.6705	28.9839	21.0452	0.0147223	-0.0939083	0.5503
15	0.178966	0.292959	0.214284	-0.00158658	-0.000225837	0.0064821		15	17.8966	29.2959	21.4284	-0.158658	-0.0225837	0.64821
16	0.186333	0.298324	0.218126	-0.00287585	0.002094	0.00484549		16	18.6333	29.8324	21.8126	-0.287585	0.2094	0.484549
17	0.190915	0.300985	0.222771	-0.000904778	-0.00050599	0.00444099		17	19.0915	30.0985	22.2771	-0.0904778	-0.050599	0.444099
18	0.191984	0.306025	0.226911	-0.000471685	-0.000874762	0.00487265		18	19.1984	30.6025	22.6911	-0.0471685	-0.0874762	0.487265
19	0.19354	0.30456	0.225558	-0.00260713	-0.00418514	0.00281296		19	19.354	30.456	22.5558	-0.260713	-0.418514	0.281296
20	0.194732	0.308159	0.235936	-4.43098e-05	-0.00148081	0.00630486		20	19.4732	30.8159	23.5936	-0.00443098	-0.148081	0.630486
21	0.203309	0.314538	0.2328	-0.00149367	-0.000621767	0.00345045		21	20.3309	31.4538	23.28	-0.149367	-0.0621767	0.345045
22	0.199599	0.313281	0.234861	1.42935e-05	-0.000648925	0.00711387		22	19.9599	31.3281	23.4861	0.00142935	-0.0648925	0.711387
23	0.208305	0.3231	0.238324	-8.5761e-06	-0.000670365	0.00455391		23	20.8305	32.31	23.8324	-0.00085761	-0.0670365	0.455391
24	0.208925	0.319155	0.239695	-0.00148081	0.000696093	0.00317744		24	20.8925	31.9155	23.9695	-0.148081	0.0696093	0.317744
25	0.212486	0.327518	0.24429	-0.00116349	0.000261571	0.00597897		25	21.2486	32.7518	24.429	-0.116349	0.0261571	0.597897
26	0.208778	0.322843	0.246148	-0.00103914	5.14566e-05	-0.00392499		26	20.8778	32.2843	24.6148	-0.103914	0.00514566	-0.392499
27	0.215307	0.328972	0.288467	-0.00032875	-0.00143078	-0.00532004		27	21.5307	32.8972	28.8467	-0.032875	-0.143078	-0.532004
28	0.211079	0.325726	0.298844	0.00041737	-0.00116635	-0.00325463		28	21.1079	32.5726	29.8844	0.041737	-0.116635	-0.325463
29	0.220244	0.328029	0.304905	-0.000974816	0.000758985	-0.00237701		29	22.0244	32.8029	30.4905	-0.0974816	0.0758985	-0.237701
30	0.219624	0.3311	0.31244	0.000164375	0.00390069	-0.000182957		30	21.9624	33.11	31.244	0.0164375	0.390069	-0.0182957
31	0.220844	0.335448	0.318921	0.000730398	0.000455962	-0.00085761		31	22.0844	33.5448	31.8921	0.0730398	0.0455962	-0.085761
32	0.220591	0.332211	0.322468	0.115447	0.116422	0.116741		32	22.0591	33.2211	32.2468	11.5447	11.6422	11.6741
33	0.222314	0.331929	0.319048	0.175994	0.236247	0.226022		33	22.2314	33.1929	31.9048	17.5994	23.6247	22.6022
34	0.224171	0.334999	0.320106	0.202513	0.281392	0.260781		34	22.4171	33.4999	32.0106	20.2513	28.1392	26.0781
35	0.221505	0.332275	0.326955	0.220729	0.299755	0.281765		35	22.1505	33.2275	32.6955	22.0729	29.9755	28.1765
36	0.228667	0.338428	0.32741	0.224845	0.307432	0.287422		36	22.8667	33.8428	32.741	22.4845	30.7432	28.7422
37	0.228036	0.335517	0.333547	0.23088	0.314651	0.298105		37	22.8036	33.5517	33.3547	23.088	31.4651	29.8105
38	0.228716	0.346629	0.334814	0.239013	0.313762	0.297945		38	22.8716	34.6629	33.4814	23.9013	31.3762	29.7945
39	0.233764	0.357433	0.340415	0.244846	0.319674	0.304014		39	23.3764	35.7433	34.0415	24.4846	31.9674	30.4014
40	0.227734	0.354241	0.336876	0.243494	0.31963	0.3132		40	22.7734	35.4241	33.6876	24.3494	31.963	31.32
41	0.227291	0.358665	0.336437	0.245695	0.321306	0.306412		41	22.7291	35.8665	33.6437	24.5695	32.1306	30.6412
42	0.235181	0.366425	0.339739	0.248141	0.320156	0.306938		42	23.5181	36.6425	33.9739	24.8141	32.0156	30.6938
43	0.230857	0.372629	0.345072	0.253558	0.324499	0.312389		43	23.0857	37.2629	34.5072	25.3558	32.4499	31.2389
44	0.235009	0.381239	0.350126	0.256328	0.323733	0.315933		44	23.5009	38.1239	35.0126	25.6328	32.3733	31.5933
45	0.236988	0.373792	0.344012	0.259405	0.32515	0.314072		45	23.6988	37.3792	34.4012	25.9405	32.515	31.4072
46	0.243691	0.379036	0.347049	0.258747	0.326556	0.31498		46	24.3691	37.9036	34.7049	25.8747	32.6556	31.498
47	0.247769	0.382818	0.351508	0.260858	0.328697	0.320054		47	24.7769	38.2818	35.1508	26.0858	32.8697	32.0054
48	0.243756	0.385761	0.361967	0.262937	0.335934	0.314879		48	24.3756	38.5761	36.1967	26.2937	33.5934	31.4879
49	0.231314	0.368332	0.357509	0.262624	0.331921	0.315352		49	23.1314	36.8332	35.7509	26.2624	33.1921	31.5352
50	0.252579	0.35674	0.359434	0.270023	0.333663	0.319204		50	25.2579	35.674	35.9434	27.0023	33.3663	31.9204

## Sheet: Figure B
	Ratio to MAX DATA								% MAX DATA
minutes	a	b	c	d	e	f		minutes	a	b	c	d	e	f
0	0.0340654	0.0346043	0.0428716	0.0178433	0.0145829	0.0347734		0	3.40654	3.46043	4.28716	1.78433	1.45829	3.47734
1	0.0609881	0.0788419	0.057308	0.0106205	0.00825975	0.0330571		1	6.09881	7.88419	5.7308	1.06205	0.825975	3.30571
2	0.0813476	0.130923	0.0787212	0.00857522	0.00546423	0.0287295		2	8.13476	13.0923	7.87212	0.857522	0.546423	2.87295
3	0.103393	0.169563	0.0995668	0.0075971	0.0106281	0.0335416		3	10.3393	16.9563	9.95668	0.75971	1.06281	3.35416
4	0.114098	0.205114	0.110823	0.00534046	0.00791257	0.032088		4	11.4098	20.5114	11.0823	0.534046	0.791257	3.2088
5	0.128194	0.237386	0.125151	0.00448309	0.0083639	0.027937		5	12.8194	23.7386	12.5151	0.448309	0.83639	2.7937
6	0.13642	0.267841	0.137003	0.00505819	0.00470347	0.0277529		6	13.642	26.7841	13.7003	0.505819	0.470347	2.77529
7	0.1389	0.292441	0.146626	0.00320458	0.00687407	0.0229286		7	13.89	29.2441	14.6626	0.320458	0.687407	2.29286
8	0.150304	0.315963	0.15945	0.00464007	0.0089224	0.0249936		8	15.0304	31.5963	15.945	0.464007	0.89224	2.49936
9	0.157755	0.337687	0.16275	0.00134342	0.00883334	0.0252472		9	15.7755	33.7687	16.275	0.134342	0.883334	2.52472
10	0.15814	0.351299	0.170286	0.00453139	0.00680614	0.0249302		10	15.814	35.1299	17.0286	0.453139	0.680614	2.49302
11	0.169932	0.365452	0.180475	0.00476686	0.00450271	0.0266389		11	16.9932	36.5452	18.0475	0.476686	0.450271	2.66389
12	0.17504	0.377606	0.181989	0.00170116	0.00760615	0.0234358		12	17.504	37.7606	18.1989	0.170116	0.760615	2.34358
13	0.177172	0.388163	0.191684	0.0030008	0.00600311	0.021546		13	17.7172	38.8163	19.1684	0.30008	0.600311	2.1546
14	0.180655	0.397547	0.194838	0.000852843	0.00814956	0.0242358		14	18.0655	39.7547	19.4838	0.0852843	0.814956	2.42358
15	0.187733	0.404762	0.201983	0.00200456	0.00698426	0.0222947		15	18.7733	40.4762	20.1983	0.200456	0.698426	2.22947
16	0.18907	0.412637	0.20611	0.00276834	0.00594122	0.0225966		16	18.907	41.2637	20.611	0.276834	0.594122	2.25966
17	0.192878	0.414402	0.207525	0.00207701	0.00388232	0.0196184		17	19.2878	41.4402	20.7525	0.207701	0.388232	1.96184
18	0.19515	0.426278	0.212898	0	0.00555782	0.0234283		18	19.515	42.6278	21.2898	0	0.555782	2.34283
19	0.194229	0.431258	0.212095	0.00273665	0.00539782	0.0208954		19	19.4229	43.1258	21.2095	0.273665	0.539782	2.08954
20	0.201001	0.431818	0.220503	0.0010702	0.00581896	0.0205603		20	20.1001	43.1818	22.0503	0.10702	0.581896	2.05603
21	0.201973	0.435273	0.227256	0.000599254	0.00434573	0.0220215		21	20.1973	43.5273	22.7256	0.0599254	0.434573	2.20215
22	0.208445	0.439015	0.228649	0.00129511	0.00735105	0.0215233		22	20.8445	43.9015	22.8649	0.129511	0.735105	2.15233
23	0.204936	0.443205	0.229001	0.0011487	0.0056499	0.016361		23	20.4936	44.3205	22.9001	0.11487	0.56499	1.6361
24	0.208593	0.445255	0.23666	0.000627934	0.00678199	0.0212516		24	20.8593	44.5255	23.666	0.0627934	0.678199	2.12516
25	0.233208	0.462677	0.271077	0.0045646	0.0123715	0.00555631		25	23.3208	46.2677	27.1077	0.45646	1.23715	0.555631
26	0.220399	0.456999	0.337824	0.00648463	0.00979637	0.00572235		26	22.0399	45.6999	33.7824	0.648463	0.979637	0.572235
27	0.220966	0.462922	0.364573	0.00319703	0.00888315	0.00979637		27	22.0966	46.2922	36.4573	0.319703	0.888315	0.979637
28	0.225676	0.463367	0.392029	0.00667633	0.00879259	0.0097526		28	22.5676	46.3367	39.2029	0.667633	0.879259	0.97526
29	0.227065	0.460982	0.409964	0.00648915	0.01157	0.0105753		29	22.7065	46.0982	40.9964	0.648915	1.157	1.05753
30	0.229608	0.467375	0.418757	0.00503404	0.00804842	0.0082205		30	22.9608	46.7375	41.8757	0.503404	0.804842	0.82205
31	0.235391	0.466419	0.419736	0.120689	0.0972317	0.0931108		31	23.5391	46.6419	41.9736	12.0689	9.72317	9.31108
32	0.229442	0.466535	0.432985	0.170611	0.228349	0.217451		32	22.9442	46.6535	43.2985	17.0611	22.8349	21.7451
33	0.225369	0.467824	0.437549	0.207307	0.299155	0.277044		33	22.5369	46.7824	43.7549	20.7307	29.9155	27.7044
34	0.226909	0.465295	0.442162	0.234905	0.33663	0.303816		34	22.6909	46.5295	44.2162	23.4905	33.663	30.3816
35	0.228794	0.469521	0.44188	0.24068	0.348523	0.335459		35	22.8794	46.9521	44.188	24.068	34.8523	33.5459
36	0.227262	0.472975	0.451628	0.25447	0.366319	0.35255		36	22.7262	47.2975	45.1628	25.447	36.6319	35.255
37	0.233142	0.477248	0.453581	0.266784	0.374632	0.367482		37	23.3142	47.7248	45.3581	26.6784	37.4632	36.7482
38	0.235534	0.474471	0.455035	0.283016	0.387268	0.374347		38	23.5534	47.4471	45.5035	28.3016	38.7268	37.4347
39	0.234825	0.470833	0.464058	0.285417	0.398957	0.375227		39	23.4825	47.0833	46.4058	28.5417	39.8957	37.5227
40	0.236541	0.474824	0.461165	0.286927	0.404519	0.385757		40	23.6541	47.4824	46.1165	28.6927	40.4519	38.5757
41	0.240189	0.479367	0.468232	0.290021	0.408525	0.387475		41	24.0189	47.9367	46.8232	29.0021	40.8525	38.7475
42	0.246291	0.47444	0.474569	0.293143	0.412311	0.397155		42	24.6291	47.444	47.4569	29.3143	41.2311	39.7155
43	0.253054	0.463604	0.470268	0.303116	0.421631	0.396152		43	25.3054	46.3604	47.0268	30.3116	42.1631	39.6152
44	0.257672	0.455386	0.475064	0.302799	0.42279	0.411659		44	25.7672	45.5386	47.5064	30.2799	42.279	41.1659
45	0.25332	0.450603	0.472172	0.302447	0.42962	0.412193		45	25.332	45.0603	47.2172	30.2447	42.962	41.2193
46	0.258565	0.46936	0.471278	0.299214	0.429696	0.412596		46	25.8565	46.936	47.1278	29.9214	42.9696	41.2596
47	0.269675	0.465788	0.468024	0.306092	0.435373	0.422809		47	26.9675	46.5788	46.8024	30.6092	43.5373	42.2809
48	0.274415	0.473346	0.466923	0.308454	0.434484	0.426406		48	27.4415	47.3346	46.6923	30.8454	43.4484	42.6406
49	0.270235	0.457764	0.486992	0.302251	0.434025	0.425916		49	27.0235	45.7764	48.6992	30.2251	43.4025	42.5916
50	0.27208	0.451276	0.487388	0.306275	0.432669	0.431004		50	27.208	45.1276	48.7388	30.6275	43.2669	43.1004
