# Supplementary material for: HOPS recognizes each SNARE, assembling ternary trans-complexes for rapid fusion upon engagement with the 4th SNARE
Source: eLife. 2020 Jan 21;9:e53559. doi: 10.7554/eLife.53559 (PMC6994237; doi:10.7554/eLife.53559)
Supplement: Figure 5—source data 1. [file elife-53559-fig5-data1.xlsx]

## Sheet: Figure A
	Ratio to MAX DATA										% MAX DATA
minutes	a	b	c	d	e	f	g	h		minutes	a	b	c	d	e	f	g	h
0	0.0258607	0	0.00324014	0.00766987	0.0162821	0.0209689	0.0190827	0.0216936		0	2.58607	0	0.324014	0.766987	1.62821	2.09689	1.90827	2.16936
1	0.0601188	-0.000150279	0.00454771	0.00833278	0.0200307	0.0197231	0.018042	0.0225644		1	6.01188	-0.0150279	0.454771	0.833278	2.00307	1.97231	1.8042	2.25644
2	0.0773939	0.000248593	0.00366991	0.00882997	0.0154675	0.0192877	0.0196108	0.0224352		2	7.73939	0.0248593	0.366991	0.882997	1.54675	1.92877	1.96108	2.24352
3	0.0982771	-0.000193818	0.00320362	0.00843812	0.0169099	0.0176178	0.0177077	0.022834		3	9.82771	-0.0193818	0.320362	0.843812	1.69099	1.76178	1.77077	2.2834
4	0.115413	-0.000164324	0.00301963	0.00684122	0.0153777	0.0155785	0.0155111	0.0209717		4	11.5413	-0.0164324	0.301963	0.684122	1.53777	1.55785	1.55111	2.09717
5	0.131183	-0.00125561	0.00246767	0.00741987	0.0120153	0.0157246	0.01857	0.0225124		5	13.1183	-0.125561	0.246767	0.741987	1.20153	1.57246	1.857	2.25124
6	0.145433	-0.000926957	0.00329491	0.0090603	0.0139044	0.0152555	0.0160097	0.0202442		6	14.5433	-0.0926957	0.329491	0.90603	1.39044	1.52555	1.60097	2.02442
7	0.159659	-0.0028539	0.00275419	0.00948305	0.0103566	0.0132021	0.0197358	0.0215925		7	15.9659	-0.28539	0.275419	0.948305	1.03566	1.32021	1.97358	2.15925
8	0.167782	-0.00243818	0.00293958	0.00919513	0.00956732	0.0158903	0.0175448	0.0195237		8	16.7782	-0.243818	0.293958	0.919513	0.956732	1.58903	1.75448	1.95237
9	0.182004	-0.00124437	0.00315306	0.0075842	0.0121895	0.0157667	0.0150855	0.0230096		9	18.2004	-0.124437	0.315306	0.75842	1.21895	1.57667	1.50855	2.30096
10	0.190462	-0.00141853	0.00633561	0.00876255	0.0127457	0.0112162	0.0153145	0.0197568		10	19.0462	-0.141853	0.633561	0.876255	1.27457	1.12162	1.53145	1.97568
11	0.202547	-0.000825835	0.0041053	0.00972462	0.0120083	0.0132021	0.019115	0.0229295		11	20.2547	-0.0825835	0.41053	0.972462	1.20083	1.32021	1.9115	2.29295
12	0.204342	-0.00100842	0.00406738	0.00760245	0.0123159	0.0139549	0.0167428	0.0190911		12	20.4342	-0.100842	0.406738	0.760245	1.23159	1.39549	1.67428	1.90911
13	0.218513	0.000325839	0.00608561	0.0105476	0.0124016	0.0159395	0.0161712	0.0177274		13	21.8513	0.0325839	0.608561	1.05476	1.24016	1.59395	1.61712	1.77274
14	0.228353	-0.00134971	0.00126403	0.00709122	0.0107555	0.0145406	0.015476	0.0246543		14	22.8353	-0.134971	0.126403	0.709122	1.07555	1.45406	1.5476	2.46543
15	0.235849	-0.00131459	0.00582157	0.00945637	0.0118075	0.0137611	0.0158271	0.0217709		15	23.5849	-0.131459	0.582157	0.945637	1.18075	1.37611	1.58271	2.17709
16	0.244791	-0.00426962	0.00463338	0.00853784	0.00814458	0.0142274	0.0192147	0.0183861		16	24.4791	-0.426962	0.463338	0.853784	0.814458	1.42274	1.92147	1.83861
17	0.252724	-0.000691004	0.00279773	0.00852379	0.00869514	0.0155378	0.0166993	0.0203144		17	25.2724	-0.0691004	0.279773	0.852379	0.869514	1.55378	1.66993	2.03144
18	0.257652	0.000543534	0.00528506	0.00585668	0.0124521	0.0146684	0.0174099	0.0205447		18	25.7652	0.0543534	0.528506	0.585668	1.24521	1.46684	1.74099	2.05447
19	0.2611	-0.000566006	0.00367412	0.00669656	0.00946479	0.0126375	0.0175083	0.02107		19	26.11	-0.0566006	0.367412	0.669656	0.946479	1.26375	1.75083	2.107
20	0.268254	0.00226402	0.00524854	0.00684684	0.0124423	0.0146867	0.0162639	0.0210335		20	26.8254	0.226402	0.524854	0.684684	1.24423	1.46867	1.62639	2.10335
21	0.269561	0.000325839	0.00546483	0.00750133	0.0104297	0.0144774	0.0188987	0.0236697		21	26.9561	0.0325839	0.546483	0.750133	1.04297	1.44774	1.88987	2.36697
22	0.275287	-0.000630612	0.00430333	0.00799009	0.0085898	0.0124915	0.0190181	0.0223635		22	27.5287	-0.0630612	0.430333	0.799009	0.85898	1.24915	1.90181	2.23635
23	0.282954	-0.00190307	0.00537776	0.00823587	0.0111811	0.0144282	0.0178285	0.0194352		23	28.2954	-0.190307	0.537776	0.823587	1.11811	1.44282	1.78285	1.94352
24	0.286154	0.000598309	0.00264183	0.00880328	0.0101291	0.0124943	0.0144619	0.0204619		24	28.6154	0.0598309	0.264183	0.880328	1.01291	1.24943	1.44619	2.04619
25	0.292083	0.000124999	0.0035744	0.0118693	0.0080884	0.0124282	0.01566	0.0220967		25	29.2083	0.0124999	0.35744	1.18693	0.80884	1.24282	1.566	2.20967
26	0.298201	0.000764037	0.00449574	0.00746481	0.00914176	0.0130855	0.0175279	0.0193257		26	29.8201	0.0764037	0.449574	0.746481	0.914176	1.30855	1.75279	1.93257
27	0.305174	-0.00224857	0.00408563	0.00835525	0.010667	0.0130462	0.0151557	0.019886		27	30.5174	-0.224857	0.408563	0.835525	1.0667	1.30462	1.51557	1.9886
28	0.30826	0.000818812	0.00353789	0.00809262	0.0114802	0.0126895	0.0182302	0.0220798		28	30.826	0.0818812	0.353789	0.809262	1.14802	1.26895	1.82302	2.20798
29	0.31359	-0.00183285	0.0050786	0.00904345	0.00934963	0.0112148	0.0158847	0.0188762		29	31.359	-0.183285	0.50786	0.904345	0.934963	1.12148	1.58847	1.88762
30	0.303878	-0.000553365	0.00508984	0.00755049	0.00894795	0.015101	0.0210181	0.0188172		30	30.3878	-0.0553365	0.508984	0.755049	0.894795	1.5101	2.10181	1.88172
31	0.338639	0.160201	0.304132	0.208009	0.0292146	0.0336682	0.0452931	0.0350277		31	33.8639	16.0201	30.4132	20.8009	2.92146	3.36682	4.52931	3.50277
32	0.337252	0.307536	0.344914	0.295146	0.0649207	0.0696973	0.0810638	0.0794388		32	33.7252	30.7536	34.4914	29.5146	6.49207	6.96973	8.10638	7.94388
33	0.333012	0.346737	0.358036	0.327477	0.0886522	0.104741	0.114335	0.11336		33	33.3012	34.6737	35.8036	32.7477	8.86522	10.4741	11.4335	11.336
34	0.329912	0.365216	0.366019	0.343954	0.116315	0.131621	0.137676	0.142376		34	32.9912	36.5216	36.6019	34.3954	11.6315	13.1621	13.7676	14.2376
35	0.32562	0.372578	0.367096	0.350244	0.136559	0.153059	0.165979	0.167064		35	32.562	37.2578	36.7096	35.0244	13.6559	15.3059	16.5979	16.7064
36	0.328515	0.379798	0.36839	0.353661	0.154284	0.165983	0.184181	0.191488		36	32.8515	37.9798	36.839	35.3661	15.4284	16.5983	18.4181	19.1488
37	0.324337	0.379041	0.372694	0.358744	0.166425	0.184532	0.202356	0.207745		37	32.4337	37.9041	37.2694	35.8744	16.6425	18.4532	20.2356	20.7745
38	0.327148	0.382391	0.375235	0.365232	0.176191	0.201445	0.213064	0.221946		38	32.7148	38.2391	37.5235	36.5232	17.6191	20.1445	21.3064	22.1946
39	0.331726	0.377217	0.374206	0.364634	0.183921	0.212279	0.228023	0.234648		39	33.1726	37.7217	37.4206	36.4634	18.3921	21.2279	22.8023	23.4648
40	0.333911	0.38368	0.375818	0.368783	0.192985	0.2093	0.241125	0.244312		40	33.3911	38.368	37.5818	36.8783	19.2985	20.93	24.1125	24.4312

## Sheet: Figure B
	Ratio to MAX DATA											% MAX DATA
minutes	a	b	c	d	e	f	g	h	i		minutes	a	b	c	d	e	f	g	h	i
0	0.033262	0.019767	0.037659	0.049035	0	0.042098	0.028799	0.060332	0.058612		0	0.033262	0.019767	0.037659	0.058612	0.060332	0.028799	0.042098	0	0.049035
1	0.072472	0.008557	0.036049	0.041023	0.033611	0.040954	0.041481	0.041515	0.055058		1	0.072472	0.008557	0.036049	0.055058	0.041515	0.041481	0.040954	0.033611	0.041023
2	0.103215	0.010185	0.034553	0.038005	0.03482	0.038884	0.039382	0.04162	0.054821		2	0.103215	0.010185	0.034553	0.054821	0.04162	0.039382	0.038884	0.03482	0.038005
3	0.123326	0.010581	0.035539	0.038505	0.036359	0.041006	0.04041	0.039482	0.05262		3	0.123326	0.010581	0.035539	0.05262	0.039482	0.04041	0.041006	0.036359	0.038505
4	0.142009	0.006788	0.032982	0.035138	0.033333	0.039052	0.042011	0.040662	0.049695		4	0.142009	0.006788	0.032982	0.049695	0.040662	0.042011	0.039052	0.033333	0.035138
5	0.158073	0.011597	0.035158	0.036084	0.034394	0.040163	0.043512	0.039713	0.052086		5	0.158073	0.011597	0.035158	0.052086	0.039713	0.043512	0.040163	0.034394	0.036084
6	0.171588	0.014097	0.031084	0.035877	0.031415	0.038287	0.04147	0.038544	0.050503		6	0.171588	0.014097	0.031084	0.050503	0.038544	0.04147	0.038287	0.031415	0.035877
7	0.187895	0.013907	0.032948	0.036942	0.035522	0.043072	0.04155	0.042334	0.048917		7	0.187895	0.013907	0.032948	0.048917	0.042334	0.04155	0.043072	0.035522	0.036942
8	0.194654	0.01358	0.032084	0.035886	0.033329	0.038659	0.040758	0.037107	0.048759		8	0.194654	0.01358	0.032084	0.048759	0.037107	0.040758	0.038659	0.033329	0.035886
9	0.207026	0.010877	0.02918	0.035472	0.032842	0.038325	0.037482	0.039757	0.048331		9	0.207026	0.010877	0.02918	0.048331	0.039757	0.037482	0.038325	0.032842	0.035472
10	0.215473	0.010692	0.032148	0.032944	0.034479	0.039033	0.037627	0.039401	0.048204		10	0.215473	0.010692	0.032148	0.048204	0.039401	0.037627	0.039033	0.034479	0.032944
11	0.220915	0.012526	0.029404	0.035451	0.032565	0.035619	0.036527	0.039951	0.045586		11	0.220915	0.012526	0.029404	0.045586	0.039951	0.036527	0.035619	0.032565	0.035451
12	0.231136	0.011554	0.031466	0.03247	0.034277	0.039527	0.038988	0.038641	0.041019		12	0.231136	0.011554	0.031466	0.041019	0.038641	0.038988	0.039527	0.034277	0.03247
13	0.238421	0.012808	0.029725	0.033234	0.030477	0.038547	0.036849	0.038998	0.041581		13	0.238421	0.012808	0.029725	0.041581	0.038998	0.036849	0.038547	0.030477	0.033234
14	0.243324	0.01427	0.031356	0.03073	0.029917	0.037726	0.038214	0.039448	0.041783		14	0.243324	0.01427	0.031356	0.041783	0.039448	0.038214	0.037726	0.029917	0.03073
15	0.255176	0.015004	0.028865	0.035128	0.032215	0.04029	0.042273	0.037687	0.044284		15	0.255176	0.015004	0.028865	0.044284	0.037687	0.042273	0.04029	0.032215	0.035128
16	0.259574	0.01118	0.03004	0.032604	0.031234	0.038845	0.037146	0.037818	0.041672		16	0.259574	0.01118	0.03004	0.041672	0.037818	0.037146	0.038845	0.031234	0.032604
17	0.264345	0.012945	0.028905	0.030443	0.033852	0.039542	0.038547	0.037114	0.041302		17	0.264345	0.012945	0.028905	0.041302	0.037114	0.038547	0.039542	0.033852	0.030443
18	0.271397	0.014254	0.030843	0.030691	0.031419	0.039236	0.039389	0.036802	0.041797		18	0.271397	0.014254	0.030843	0.041797	0.036802	0.039389	0.039236	0.031419	0.030691
19	0.279075	0.015681	0.033895	0.031635	0.032071	0.040988	0.041699	0.039465	0.039931		19	0.279075	0.015681	0.033895	0.039931	0.039465	0.041699	0.040988	0.032071	0.031635
20	0.282997	0.016039	0.027936	0.035913	0.033006	0.040324	0.0387	0.041815	0.039178		20	0.282997	0.016039	0.027936	0.039178	0.041815	0.0387	0.040324	0.033006	0.035913
21	0.289549	0.012369	0.0322	0.034442	0.034084	0.041632	0.041389	0.037921	0.038481		21	0.289549	0.012369	0.0322	0.038481	0.037921	0.041389	0.041632	0.034084	0.034442
22	0.291904	0.012851	0.03352	0.032599	0.034944	0.041183	0.035781	0.03843	0.03902		22	0.291904	0.012851	0.03352	0.03902	0.03843	0.035781	0.041183	0.034944	0.032599
23	0.294654	0.014917	0.030666	0.034548	0.032346	0.03889	0.040037	0.041063	0.040747		23	0.294654	0.014917	0.030666	0.040747	0.041063	0.040037	0.03889	0.032346	0.034548
24	0.300477	0.015774	0.031472	0.035211	0.033325	0.039359	0.039712	0.038632	0.040699		24	0.300477	0.015774	0.031472	0.040699	0.038632	0.039712	0.039359	0.033325	0.035211
25	0.302838	0.015981	0.030513	0.032631	0.035152	0.039788	0.039737	0.036981	0.037557		25	0.302838	0.015981	0.030513	0.037557	0.036981	0.039737	0.039788	0.035152	0.032631
26	0.306725	0.014912	0.031871	0.032068	0.033278	0.036959	0.037185	0.040309	0.037772		26	0.306725	0.014912	0.031871	0.037772	0.040309	0.037185	0.036959	0.033278	0.032068
27	0.310534	0.016991	0.029557	0.033567	0.031517	0.03694	0.039666	0.041964	0.040156		27	0.310534	0.016991	0.029557	0.040156	0.041964	0.039666	0.03694	0.031517	0.033567
28	0.311327	0.015951	0.032288	0.031697	0.03487	0.039128	0.041472	0.039911	0.038193		28	0.311327	0.015951	0.032288	0.038193	0.039911	0.041472	0.039128	0.03487	0.031697
29	0.319675	0.014386	0.031796	0.032577	0.032727	0.039098	0.042339	0.036823	0.037646		29	0.319675	0.014386	0.031796	0.037646	0.036823	0.042339	0.039098	0.032727	0.032577
30	0.314114	0.014923	0.030105	0.030483	0.035308	0.041451	0.037634	0.041461	0.040257		30	0.314114	0.014923	0.030105	0.040257	0.041461	0.037634	0.041451	0.035308	0.030483
31	0.355226	0.02482	0.33762	0.059873	0.069906	0.113147	0.193375	0.224184	0.325233		31	0.355226	0.02482	0.33762	0.25	0.224184	0.193375	0.113147	0.069906	0.059873
32	0.349901	0.024867	0.373192	0.06097	0.072104	0.113643	0.206221	0.240094	0.258184		32	0.349901	0.024867	0.373192	0.258184	0.240094	0.206221	0.113643	0.072104	0.06097
33	0.33915	0.024215	0.393585	0.068552	0.073573	0.12243	0.219474	0.247806	0.268715		33	0.33915	0.024215	0.393585	0.268715	0.247806	0.219474	0.12243	0.073573	0.068552
34	0.33932	0.023289	0.394072	0.067567	0.077978	0.123049	0.220684	0.255687	0.273628		34	0.33932	0.023289	0.394072	0.273628	0.255687	0.220684	0.123049	0.077978	0.067567
35	0.349962	0.021242	0.403339	0.068104	0.074773	0.129856	0.222599	0.256574	0.27582		35	0.349962	0.021242	0.403339	0.27582	0.256574	0.222599	0.129856	0.074773	0.068104
36	0.346015	0.022994	0.407104	0.066408	0.078025	0.128366	0.223279	0.255914	0.276306		36	0.346015	0.022994	0.407104	0.276306	0.255914	0.223279	0.128366	0.078025	0.066408
37	0.344463	0.021943	0.405141	0.066971	0.08002	0.135321	0.226477	0.261206	0.278122		37	0.344463	0.021943	0.405141	0.278122	0.261206	0.226477	0.135321	0.08002	0.066971
38	0.350142	0.020467	0.407675	0.067889	0.079209	0.128447	0.222746	0.26207	0.278124		38	0.350142	0.020467	0.407675	0.278124	0.26207	0.222746	0.128447	0.079209	0.067889
39	0.347748	0.022408	0.415474	0.069365	0.079588	0.135126	0.227384	0.264634	0.278453		39	0.347748	0.022408	0.415474	0.278453	0.264634	0.227384	0.135126	0.079588	0.069365
40	0.350319	0.022797	0.416287	0.067503	0.080185	0.134893	0.226443	0.263644	0.28268		40	0.350319	0.022797	0.416287	0.28268	0.263644	0.226443	0.134893	0.080185	0.067503
