# Supplementary material for: HOPS recognizes each SNARE, assembling ternary trans-complexes for rapid fusion upon engagement with the 4th SNARE
Source: eLife. 2020 Jan 21;9:e53559. doi: 10.7554/eLife.53559 (PMC6994237; doi:10.7554/eLife.53559)
Supplement: Figure 6—source data 1. [file elife-53559-fig6-data1.xlsx]

## Sheet: Figure A
	Ratio to MAX DATA						%/MAX DATA
	a	b	c	d			a	b	c	d
0	0.0316023	0.015324	0.0211301	0.0208464		0	3.16023	1.5324	2.11301	2.08464
1	0.0757254	0.0150824	0.019605	0.0251187		1	7.57254	1.50824	1.9605	2.51187
2	0.10336	0.0108102	0.0161522	0.021384		2	10.336	1.08102	1.61522	2.1384
3	0.121866	0.0117014	0.0163116	0.0202791		3	12.1866	1.17014	1.63116	2.02791
4	0.13588	0.0108224	0.0145624	0.0180187		4	13.588	1.08224	1.45624	1.80187
5	0.148811	0.0129008	0.0134068	0.0180029		5	14.8811	1.29008	1.34068	1.80029
6	0.15673	0.0081978	0.01344	0.0178944		6	15.673	0.81978	1.344	1.78944
7	0.165029	0.0103777	0.0121724	0.0175424		7	16.5029	1.03777	1.21724	1.75424
8	0.170674	0.00990669	0.011936	0.0174059		8	17.0674	0.990669	1.1936	1.74059
9	0.176925	0.00986642	0.0144241	0.0180817		9	17.6925	0.986642	1.44241	1.80817
10	0.181309	0.00943044	0.0126942	0.0181728		10	18.1309	0.943044	1.26942	1.81728
11	0.187278	0.0117084	0.00977362	0.0170644		11	18.7278	1.17084	0.977362	1.70644
12	0.189029	0.0103094	0.0104862	0.0164516		12	18.9029	1.03094	1.04862	1.64516
13	0.198407	0.0121111	0.0124805	0.0193249		13	19.8407	1.21111	1.24805	1.93249
14	0.197505	0.0108487	0.0110956	0.0197451		14	19.7505	1.08487	1.10956	1.97451
15	0.202814	0.00694764	0.00951274	0.0189257		15	20.2814	0.694764	0.951274	1.89257
16	0.203863	0.00830811	0.00920808	0.0160226		16	20.3863	0.830811	0.920808	1.60226
17	0.203371	0.00767778	0.0105685	0.0137692		17	20.3371	0.767778	1.05685	1.37692
18	0.207408	0.00775306	0.0102131	0.0165917		18	20.7408	0.775306	1.02131	1.65917
19	0.216468	0.0094462	0.0102814	0.0136624		19	21.6468	0.94462	1.02814	1.36624
20	0.215895	0.00871782	0.01105	0.0139671		20	21.5895	0.871782	1.105	1.39671
21	0.219416	0.00774256	0.0103917	0.0159544		21	21.9416	0.774256	1.03917	1.59544
22	0.221242	0.0075307	0.00934115	0.0129813		22	22.1242	0.75307	0.934115	1.29813
23	0.22196	0.00830635	0.0102831	0.0167563		23	22.196	0.830635	1.02831	1.67563
24	0.220852	0.00988043	0.0121969	0.0159404		24	22.0852	0.988043	1.21969	1.59404
25	0.224496	0.00899622	0.0124998	0.0147532		25	22.4496	0.899622	1.24998	1.47532
26	0.226894	0.00774781	0.00838339	0.0161505		26	22.6894	0.774781	0.838339	1.61505
27	0.231107	0.00794216	0.00756922	0.0124088		27	23.1107	0.794216	0.756922	1.24088
28	0.228479	0.00993471	0.00840441	0.0145799		28	22.8479	0.993471	0.840441	1.45799
29	0.229854	0.0106246	0.0093499	0.0138988		29	22.9854	1.06246	0.93499	1.38988
30	0.232891	0.0061107	0.0105038	0.014706		30	23.2891	0.61107	1.05038	1.4706
31	0.264103	0.144234	0.050078	0.0306848		31	26.4103	14.4234	5.0078	3.06848
32	0.264994	0.195168	0.095812	0.0684241		32	26.4994	19.5168	9.5812	6.84241
33	0.261275	0.216855	0.120318	0.0951589		33	26.1275	21.6855	12.0318	9.51589
34	0.253246	0.235476	0.140354	0.116406		34	25.3246	23.5476	14.0354	11.6406
35	0.251148	0.244328	0.156712	0.130878		35	25.1148	24.4328	15.6712	13.0878
36	0.249779	0.250714	0.163835	0.144053		36	24.9779	25.0714	16.3835	14.4053
37	0.252122	0.253232	0.174957	0.156648		37	25.2122	25.3232	17.4957	15.6648
38	0.250276	0.256145	0.181435	0.160489		38	25.0276	25.6145	18.1435	16.0489
39	0.253733	0.262475	0.189337	0.167475		39	25.3733	26.2475	18.9337	16.7475
40	0.251295	0.260642	0.192886	0.172641		40	25.1295	26.0642	19.2886	17.2641
41	0.251302	0.267115	0.202024	0.179774		41	25.1302	26.7115	20.2024	17.9774
42	0.252871	0.268038	0.205563	0.184056		42	25.2871	26.8038	20.5563	18.4056
43	0.246454	0.274875	0.210742	0.188798		43	24.6454	27.4875	21.0742	18.8798
44	0.254771	0.269729	0.213764	0.190608		44	25.4771	26.9729	21.3764	19.0608
45	0.250369	0.273154	0.217417	0.200298		45	25.0369	27.3154	21.7417	20.0298
46	0.248856	0.276607	0.219576	0.196821		46	24.8856	27.6607	21.9576	19.6821
47	0.254449	0.274724	0.227903	0.196819		47	25.4449	27.4724	22.7903	19.6819
48	0.248418	0.279832	0.224396	0.202147		48	24.8418	27.9832	22.4396	20.2147
49	0.254275	0.275757	0.226089	0.20564		49	25.4275	27.5757	22.6089	20.564
50	0.247648	0.279809	0.232145	0.210147		50	24.7648	27.9809	23.2145	21.0147
51	0.248403	0.277729	0.2355	0.210066		51	24.8403	27.7729	23.55	21.0066
52	0.24758	0.278685	0.233499	0.211331		52	24.758	27.8685	23.3499	21.1331
53	0.246773	0.280142	0.232461	0.213784		53	24.6773	28.0142	23.2461	21.3784
54	0.247797	0.286177	0.238181	0.211912		54	24.7797	28.6177	23.8181	21.1912
55	0.250339	0.286385	0.241639	0.218721		55	25.0339	28.6385	24.1639	21.8721
56	0.24675	0.284365	0.242049	0.219791		56	24.675	28.4365	24.2049	21.9791
57	0.249417	0.284773	0.242017	0.221666		57	24.9417	28.4773	24.2017	22.1666
58	0.247615	0.287581	0.245974	0.223091		58	24.7615	28.7581	24.5974	22.3091
59	0.251024	0.284972	0.243754	0.225928		59	25.1024	28.4972	24.3754	22.5928
60	0.245796	0.28381	0.242982	0.224392		60	24.5796	28.381	24.2982	22.4392

## Sheet: Figure B
	Ratio to MAX DATA						%/MAX DATA
	a	b	c	d			a	b	c	d
0	0.0199446	0.0109357	0.00926372	0.011447		0	1.99446	1.09357	0.926372	1.1447
1	0.0527446	0.0108152	0.00922009	0.0111748		1	5.27446	1.08152	0.922009	1.11748
2	0.0725041	0.00341717	0.00701062	0.0114784		2	7.25041	0.341717	0.701062	1.14784
3	0.0934103	0.00322869	0.00656907	0.0105988		3	9.34103	0.322869	0.656907	1.05988
4	0.108585	0.00414319	0.00587621	0.00910316		4	10.8585	0.414319	0.587621	0.910316
5	0.121046	0.00351665	0.0040664	0.0094365		5	12.1046	0.351665	0.40664	0.94365
6	0.126303	0.00361439	0.00495647	0.00760051		6	12.6303	0.361439	0.495647	0.760051
7	0.135984	0.00444337	0.00539104	0.0121818		7	13.5984	0.444337	0.539104	1.21818
8	0.143301	0.00521128	0.00654813	0.0103126		8	14.3301	0.521128	0.654813	1.03126
9	0.150986	0.000881345	0.00542943	0.0100718		9	15.0986	0.0881345	0.542943	1.00718
10	0.155431	0.00187613	0.00378542	0.011557		10	15.5431	0.187613	0.378542	1.1557
11	0.160797	0.00255503	0.00470865	0.00987106		11	16.0797	0.255503	0.470865	0.987106
12	0.163393	0.00455158	0.00547306	0.00961277		12	16.3393	0.455158	0.547306	0.961277
13	0.165253	0.003939	0.00585353	0.0115447		13	16.5253	0.3939	0.585353	1.15447
14	0.173494	0.0025655	0.00902462	0.0112341		14	17.3494	0.25655	0.902462	1.12341
15	0.1731	0.00389362	0.0052968	0.0113475		15	17.31	0.389362	0.52968	1.13475
16	0.180004	0.00187438	0.00189882	0.0107245		16	18.0004	0.187438	0.189882	1.07245
17	0.177114	0.0016859	0.00739806	0.00866161		17	17.7114	0.16859	0.739806	0.866161
18	0.180353	0.00134034	0.00608215	0.00947489		18	18.0353	0.134034	0.608215	0.947489
19	0.186522	0.00304718	0.00594777	0.0106145		19	18.6522	0.304718	0.594777	1.06145
20	0.188885	4.36309e-05	0.00453762	0.0111503		20	18.8885	0.00436309	0.453762	1.11503
21	0.191093	0.00238923	0.00368594	0.0121399		21	19.1093	0.238923	0.368594	1.21399
22	0.191817	0.00224263	0.00456205	0.00756037		22	19.1817	0.224263	0.456205	0.756037
23	0.192728	0.00257946	0.00623224	0.00878727		23	19.2728	0.257946	0.623224	0.878727
24	0.198036	0.00195816	0.00585004	0.010269		24	19.8036	0.195816	0.585004	1.0269
25	0.198091	0.00237876	0.00444861	0.00717816		25	19.8091	0.237876	0.444861	0.717816
26	0.200111	0.00137176	0.00537882	0.0109653		26	20.0111	0.137176	0.537882	1.09653
27	0.203088	0.00319902	0.00452365	0.0124435		27	20.3088	0.319902	0.452365	1.24435
28	0.204118	0.00106285	0.0062654	0.00959531		28	20.4118	0.106285	0.62654	0.959531
29	0.206999	0.0030402	0.0053666	0.00990073		29	20.6999	0.30402	0.53666	0.990073
30	0.206955	0.00497567	0.00512227	0.0120404		30	20.6955	0.497567	0.512227	1.20404
31	0.222569	0.161276	0.0302642	0.0285486		31	22.2569	16.1276	3.02642	2.85486
32	0.22327	0.194428	0.0680398	0.056783		32	22.327	19.4428	6.80398	5.6783
33	0.22471	0.204442	0.0922934	0.080335		33	22.471	20.4442	9.22934	8.0335
34	0.227501	0.210631	0.109526	0.101		34	22.7501	21.0631	10.9526	10.1
35	0.239757	0.218406	0.117681	0.114517		35	23.9757	21.8406	11.7681	11.4517
36	0.238228	0.221411	0.129514	0.12283		36	23.8228	22.1411	12.9514	12.283
37	0.239242	0.227701	0.13919	0.133265		37	23.9242	22.7701	13.919	13.3265
38	0.236675	0.229078	0.148204	0.140076		38	23.6675	22.9078	14.8204	14.0076
39	0.231979	0.228352	0.153043	0.149167		39	23.1979	22.8352	15.3043	14.9167
40	0.232637	0.233691	0.157028	0.156021		40	23.2637	23.3691	15.7028	15.6021
41	0.232874	0.23334	0.16489	0.154548		41	23.2874	23.334	16.489	15.4548
42	0.231457	0.234991	0.169649	0.163396		42	23.1457	23.4991	16.9649	16.3396
43	0.236928	0.234898	0.172548	0.16777		43	23.6928	23.4898	17.2548	16.777
44	0.232541	0.23682	0.178382	0.168298		44	23.2541	23.682	17.8382	16.8298
45	0.236626	0.245017	0.182163	0.175347		45	23.6626	24.5017	18.2163	17.5347
46	0.236363	0.24282	0.183437	0.177944		46	23.6363	24.282	18.3437	17.7944
47	0.23623	0.242492	0.185974	0.181067		47	23.623	24.2492	18.5974	18.1067
48	0.240022	0.244836	0.190224	0.187807		48	24.0022	24.4836	19.0224	18.7807
49	0.235282	0.249654	0.192578	0.184842		49	23.5282	24.9654	19.2578	18.4842
50	0.23757	0.247312	0.197496	0.186796		50	23.757	24.7312	19.7496	18.6796
51	0.237096	0.2514	0.201816	0.194728		51	23.7096	25.14	20.1816	19.4728
52	0.238406	0.253396	0.202669	0.193203		52	23.8406	25.3396	20.2669	19.3203
53	0.241124	0.25463	0.204598	0.197704		53	24.1124	25.463	20.4598	19.7704
54	0.235356	0.25122	0.204512	0.19987		54	23.5356	25.122	20.4512	19.987
55	0.244508	0.257674	0.206264	0.197735		55	24.4508	25.7674	20.6264	19.7735
56	0.240949	0.255497	0.204788	0.204011		56	24.0949	25.5497	20.4788	20.4011
57	0.242824	0.25541	0.209643	0.207291		57	24.2824	25.541	20.9643	20.7291
58	0.244681	0.25658	0.210142	0.203222		58	24.4681	25.658	21.0142	20.3222
59	0.241358	0.258878	0.212191	0.205603		59	24.1358	25.8878	21.2191	20.5603
60	0.241773	0.262276	0.217382	0.210148		60	24.1773	26.2276	21.7382	21.0148

## Sheet: Figure C
	Ratio to MAX DATA						%/MAX DATA
	a	b	c	d			a	b	c	d
0	0.0361161	0.00830047	0.0137549	0.0171359		0	3.61161	0.830047	1.37549	1.71359
1	0.0804977	0.0115766	0.0118266	0.0190694		1	8.04977	1.15766	1.18266	1.90694
2	0.104689	0.0088057	0.00972875	0.0148108		2	10.4689	0.88057	0.972875	1.48108
3	0.125846	0.00698931	0.0106343	0.0144943		3	12.5846	0.698931	1.06343	1.44943
4	0.137695	0.00526209	0.00893157	0.0143772		4	13.7695	0.526209	0.893157	1.43772
5	0.154169	0.00284083	0.00903996	0.0133563		5	15.4169	0.284083	0.903996	1.33563
6	0.16773	0.00459428	0.00801376	0.0131622		6	16.773	0.459428	0.801376	1.31622
7	0.173728	0.00421667	0.00930219	0.0118703		7	17.3728	0.421667	0.930219	1.18703
8	0.186178	0.00325515	0.00808893	0.0145573		8	18.6178	0.325515	0.808893	1.45573
9	0.190105	0.00356983	0.0098721	0.0124629		9	19.0105	0.356983	0.98721	1.24629
10	0.196753	0.00476036	0.00771832	0.0122287		10	19.6753	0.476036	0.771832	1.22287
11	0.204575	0.00448938	0.00405933	0.0139646		11	20.4575	0.448938	0.405933	1.39646
12	0.214903	0.00415723	0.0077323	0.0113319		12	21.4903	0.415723	0.77323	1.13319
13	0.216552	0.00344221	0.00856619	0.0136552		13	21.6552	0.344221	0.856619	1.36552
14	0.223854	0.0040873	0.00804348	0.013407		14	22.3854	0.40873	0.804348	1.3407
15	0.228403	0.00345795	0.00642115	0.00963784		15	22.8403	0.345795	0.642115	0.963784
16	0.234257	0.00216777	0.00576732	0.011227		16	23.4257	0.216777	0.576732	1.1227
17	0.238284	0.00700855	0.00497713	0.0125783		17	23.8284	0.700855	0.497713	1.25783
18	0.242114	0.00177617	0.00804698	0.0136115		18	24.2114	0.177617	0.804698	1.36115
19	0.246025	0.00338277	0.00701029	0.013087		19	24.6025	0.338277	0.701029	1.3087
20	0.250357	0.00371668	0.00727078	0.00976371		20	25.0357	0.371668	0.727078	0.976371
21	0.25008	0.00492644	0.00693337	0.0125416		21	25.008	0.492644	0.693337	1.25416
22	0.249002	0.00342997	0.00868507	0.0119105		22	24.9002	0.342997	0.868507	1.19105
23	0.257806	0.0040331	0.00599634	0.00969553		23	25.7806	0.40331	0.599634	0.969553
24	0.2605	0.00603305	0.0063687	0.0102934		24	26.05	0.603305	0.63687	1.02934
25	0.257914	0.00186708	0.00537747	0.00923051		25	25.7914	0.186708	0.537747	0.923051
26	0.262783	0.00222022	0.00573411	0.0125906		26	26.2783	0.222022	0.573411	1.25906
27	0.266891	0.00312054	0.00704351	0.00987909		27	26.6891	0.312054	0.704351	0.987909
28	0.26668	0.00111535	0.00722707	0.00923925		28	26.668	0.111535	0.722707	0.923925
29	0.271842	0	0.00584249	0.0109577		29	27.1842	0	0.584249	1.09577
30	0.272985	0.00476036	0.00605927	0.0117042		30	27.2985	0.476036	0.605927	1.17042
31	0.283937	0.108362	0.0313645	0.0351476		31	28.3937	10.8362	3.13645	3.51476
32	0.29197	0.17364	0.0764559	0.0707026		32	29.197	17.364	7.64559	7.07026
33	0.289003	0.201045	0.101897	0.0945026		33	28.9003	20.1045	10.1897	9.45026
34	0.287409	0.214071	0.124666	0.112446		34	28.7409	21.4071	12.4666	11.2446
35	0.295353	0.227231	0.138213	0.124059		35	29.5353	22.7231	13.8213	12.4059
36	0.304273	0.229495	0.148975	0.13991		36	30.4273	22.9495	14.8975	13.991
37	0.30879	0.233693	0.160718	0.150151		37	30.879	23.3693	16.0718	15.0151
38	0.300238	0.246479	0.168539	0.159908		38	30.0238	24.6479	16.8539	15.9908
39	0.307163	0.252692	0.178731	0.171133		39	30.7163	25.2692	17.8731	17.1133
40	0.299149	0.256245	0.184607	0.177874		40	29.9149	25.6245	18.4607	17.7874
41	0.298923	0.260279	0.192003	0.180483		41	29.8923	26.0279	19.2003	18.0483
42	0.293053	0.263882	0.197299	0.186012		42	29.3053	26.3882	19.7299	18.6012
43	0.298018	0.259977	0.203769	0.193063		43	29.8018	25.9977	20.3769	19.3063
44	0.29624	0.265968	0.209008	0.204134		44	29.624	26.5968	20.9008	20.4134
45	0.296126	0.268496	0.212298	0.207159		45	29.6126	26.8496	21.2298	20.7159
46	0.304658	0.274199	0.220826	0.214134		46	30.4658	27.4199	22.0826	21.4134
47	0.296597	0.27663	0.22898	0.218842		47	29.6597	27.663	22.898	21.8842
48	0.29777	0.280625	0.229425	0.222461		48	29.777	28.0625	22.9425	22.2461
49	0.301401	0.280427	0.235313	0.226361		49	30.1401	28.0427	23.5313	22.6361
50	0.301062	0.281628	0.237738	0.230813		50	30.1062	28.1628	23.7738	23.0813
51	0.303332	0.284522	0.243918	0.237885		51	30.3332	28.4522	24.3918	23.7885
52	0.296542	0.285127	0.243261	0.240124		52	29.6542	28.5127	24.3261	24.0124
53	0.300728	0.287474	0.248657	0.248089		53	30.0728	28.7474	24.8657	24.8089
54	0.304546	0.286653	0.25375	0.246596		54	30.4546	28.6653	25.375	24.6596
55	0.303743	0.291385	0.252274	0.250357		55	30.3743	29.1385	25.2274	25.0357
56	0.300572	0.296682	0.2565	0.253657		56	30.0572	29.6682	25.65	25.3657
57	0.3011	0.300948	0.260106	0.255818		57	30.11	30.0948	26.0106	25.5818
58	0.303757	0.296988	0.259891	0.258839		58	30.3757	29.6988	25.9891	25.8839
59	0.303651	0.30442	0.26268	0.264645		59	30.3651	30.442	26.268	26.4645
60	0.302901	0.300953	0.268096	0.260916		60	30.2901	30.0953	26.8096	26.0916
