# Supplementary material for: HOPS recognizes each SNARE, assembling ternary trans-complexes for rapid fusion upon engagement with the 4th SNARE
Source: eLife. 2020 Jan 21;9:e53559. doi: 10.7554/eLife.53559 (PMC6994237; doi:10.7554/eLife.53559)
Supplement: Figure 8—source data 1. [file elife-53559-fig8-data1.xlsx]

## Sheet: Figure A
	Ratio to MAX DATA							%/MAX DATA
Time (min)	a	b	c	d	e		Time (min)	a	b	c	d	e
0	0.00967324	0.00706281	0.0194947	0.0336599	0.0113325		0	0.967324	0.706281	1.94947	3.36599	1.13325
1	0.00644251	0.00478321	0.00724028	0.0622988	0.00773997		1	0.644251	0.478321	0.724028	6.22988	0.773997
2	0.00383208	0.00640805	0.00788471	0.0787437	0.00740742		2	0.383208	0.640805	0.788471	7.87437	0.740742
3	0.00634602	0.00989379	0.00444204	0.0945165	0.00964567		3	0.634602	0.989379	0.444204	9.45165	0.964567
4	0.00448167	0.00724545	0.00644595	0.109509	0.00526394		4	0.448167	0.724545	0.644595	10.9509	0.526394
5	0.00655623	0.0063822	0.00567919	0.117066	0.00891165		5	0.655623	0.63822	0.567919	11.7066	0.891165
6	0.006203	0.00698872	0.00959743	0.126984	0.00721616		6	0.6203	0.698872	0.959743	12.6984	0.721616
7	0.00519157	0.00958709	0.00468327	0.135715	0.00705247		7	0.519157	0.958709	0.468327	13.5715	0.705247
8	0.00866008	0.00531908	0.00868076	0.135637	0.00750736		8	0.866008	0.531908	0.868076	13.5637	0.750736
9	0.00559649	0.005612	0.00710933	0.143886	0.00887202		9	0.559649	0.5612	0.710933	14.3886	0.887202
10	0.00654245	0.00829479	0.00910118	0.149703	0.00718859		10	0.654245	0.829479	0.910118	14.9703	0.718859
11	0.00589975	0.0043421	0.00658897	0.150941	0.00703696		11	0.589975	0.43421	0.658897	15.0941	0.703696
12	0.00827584	0.00360636	0.00592215	0.158392	0.00604793		12	0.827584	0.360636	0.592215	15.8392	0.604793
13	0.00721788	0.00601002	0.00732471	0.158866	0.0109655		13	0.721788	0.601002	0.732471	15.8866	1.09655
14	0.00832581	0.0114411	0.0069198	0.162262	0.00872039		14	0.832581	1.14411	0.69198	16.2262	0.872039
15	0.00929934	0.00624953	0.00646835	0.165536	0.00971976		15	0.929934	0.624953	0.646835	16.5536	0.971976
16	0.00543797	0.00440069	0.00759351	0.173681	0.00957675		16	0.543797	0.440069	0.759351	17.3681	0.957675
17	0.00540695	0.0104279	0.00617371	0.171403	0.0103418		17	0.540695	1.04279	0.617371	17.1403	1.03418
18	0.00442826	0.00944063	0.00848433	0.171882	0.00898402		18	0.442826	0.944063	0.848433	17.1882	0.898402
19	0.00723684	0.00836889	0.00306015	0.176772	0.00869282		19	0.723684	0.836889	0.306015	17.6772	0.869282
20	0.00478493	0.00373903	0.00708349	0.184469	0.00831892		20	0.478493	0.373903	0.708349	18.4469	0.831892
21	0.00408192	0.00908223	0.00853947	0.183985	0.0105348		21	0.408192	0.908223	0.853947	18.3985	1.05348
22	0.00629088	0.00733677	0.00749702	0.186598	0.00924937		22	0.629088	0.733677	0.749702	18.6598	0.924937
23	0.00513815	0.00960087	0.00784163	0.189266	0.0100558		23	0.513815	0.960087	0.784163	18.9266	1.00558
24	0.0036994	0.00731093	0.00598934	0.193086	0.00876863		24	0.36994	0.731093	0.598934	19.3086	0.876863
25	0.00729198	0.00525532	0.00547415	0.191638	0.00774859		25	0.729198	0.525532	0.547415	19.1638	0.774859
26	0.00735056	0.00806218	0.00881171	0.199528	0.00912703		26	0.735056	0.806218	0.881171	19.9528	0.912703
27	0.00640805	0.00493656	0.00889614	0.201126	0.00972665		27	0.640805	0.493656	0.889614	20.1126	0.972665
28	0.004013	0.00762625	0.00624091	0.196344	0.00956469		28	0.4013	0.762625	0.624091	19.6344	0.956469
29	0.00557409	0.00885479	0.00473668	0.202004	0.00725407		29	0.557409	0.885479	0.473668	20.2004	0.725407
30	0.00353227	0.0062702	0.00918906	0.206503	0.00701629		30	0.353227	0.62702	0.918906	20.6503	0.701629
31	0.00171444	0.00456265	0.00828101	0.212508	0.153323		31	0.171444	0.456265	0.828101	21.2508	15.3323
32	0.0058067	0.00428007	0.00927694	0.213695	0.214372		32	0.58067	0.428007	0.927694	21.3695	21.4372
33	0.00690256	0.00894439	0.00566024	0.215298	0.224361		33	0.690256	0.894439	0.566024	21.5298	22.4361

## Sheet: Figure C
Sample	101819_sample	102419_sample	102519_sample		Average	Stdev
a	0.0195022	0.0391753	0.0389016	a	0.0325263	0.0112801
b	0.0654349	0.0759138	0.0478915	b	0.0630801	0.0141588
c	0.314601	0.238425	0.2661	c	0.273042	0.0385593
d	1	1	1	d	1	0
e	0.608417	0.288097	0.646453	e	0.514322	0.196837
f	0.0210418	0.0103093	0.0367767	f	0.0227093	0.0133123
