# Supplementary material for: HOPS recognizes each SNARE, assembling ternary trans-complexes for rapid fusion upon engagement with the 4th SNARE
Source: eLife. 2020 Jan 21;9:e53559. doi: 10.7554/eLife.53559 (PMC6994237; doi:10.7554/eLife.53559)
Supplement: Figure 9—source data 1. [file elife-53559-fig9-data1.xlsx]

## Sheet: Figure A
	Ratio to MAX DATA								% MAX DATA
minutes	a	b	c	d	e	f		minutes	a	b	c	d	e	f
0	0.00432479	0.00959186	0.000954426	0.0192233	0	0.0190303		0	0.432479	0.959186	0.0954426	1.92233	0	1.90303
1	0.0301045	0.014884	0.00676558	-0.00248917	-0.00258039	0.00584553		1	3.01045	1.4884	0.676558	-0.248917	-0.258039	0.584553
2	0.0503242	0.0158079	0.0303275	-0.00144221	-0.00321887	0.00725866		2	5.03242	1.58079	3.03275	-0.144221	-0.321887	0.725866
3	0.073826	0.0149359	0.0483056	0.00725337	-0.00112892	0.00761293		3	7.3826	1.49359	4.83056	0.725337	-0.112892	0.761293
4	0.0869075	0.0208072	0.0699295	0.0114002	-0.00242837	0.00791962		4	8.69075	2.08072	6.99295	1.14002	-0.242837	0.791962
5	0.101874	0.0122614	0.0830403	-0.00896261	-0.00394989	0.00821044		5	10.1874	1.22614	8.30403	-0.896261	-0.394989	0.821044
6	0.114013	0.0161226	0.100675	-0.0108107	-0.000236624	0.00792755		6	11.4013	1.61226	10.0675	-1.08107	-0.0236624	0.792755
7	0.123712	0.013366	0.110831	-0.01027	-0.00107208	0.0101338		7	12.3712	1.3366	11.0831	-1.027	-0.107208	1.01338
8	0.130189	0.0137309	0.124944	-0.0110208	0.000236624	0.0113024		8	13.0189	1.37309	12.4944	-1.10208	0.0236624	1.13024
9	0.14118	0.0149175	0.136148	-0.00848672	0.00109984	0.0112905		9	14.118	1.49175	13.6148	-0.848672	0.109984	1.12905
10	0.148479	0.0125677	0.146206	-0.00825142	-0.00217852	0.0106851		10	14.8479	1.25677	14.6206	-0.825142	-0.217852	1.06851
11	0.157016	0.0106111	0.157204	-0.00613767	-0.000264384	0.010348		11	15.7016	1.06111	15.7204	-0.613767	-0.0264384	1.0348
12	0.164277	0.0105057	0.168352	-0.00675897	-0.00164975	0.0102607		12	16.4277	1.05057	16.8352	-0.675897	-0.164975	1.02607
13	0.166675	0.0173209	0.174701	-0.00775305	8.59247e-05	0.0129905		13	16.6675	1.73209	17.4701	-0.775305	0.00859247	1.29905
14	0.17314	0.0132522	0.184681	-0.00729038	-0.00278	0.0120334		14	17.314	1.32522	18.4681	-0.729038	-0.278	1.20334
15	0.177311	0.0102965	0.190072	-0.00486995	-0.000321226	0.0113526		15	17.7311	1.02965	19.0072	-0.486995	-0.0321226	1.13526
16	0.186031	0.00915168	0.199857	-0.00511715	-0.00231732	0.0100664		16	18.6031	0.915168	19.9857	-0.511715	-0.231732	1.00664
17	0.186639	0.0118664	0.202519	-0.00590766	-0.00286989	0.010496		17	18.6639	1.18664	20.2519	-0.590766	-0.286989	1.0496
18	0.191891	0.0090613	0.213306	-0.00630423	0.000236624	0.00906704		18	19.1891	0.90613	21.3306	-0.630423	0.0236624	0.906704
19	0.197	0.00952658	0.218454	-0.00823952	-0.00292805	0.010418		19	19.7	0.952658	21.8454	-0.823952	-0.292805	1.0418
20	0.200639	0.00938432	0.223961	-0.00543705	-0.00250107	0.0100572		20	20.0639	0.938432	22.3961	-0.543705	-0.250107	1.00572
21	0.207732	0.0105258	0.2268	-0.0086784	-0.00165504	0.00916619		21	20.7732	1.05258	22.68	-0.86784	-0.165504	0.916619
22	0.206363	0.00934415	0.234112	-0.00839947	-0.00105093	0.00953897		22	20.6363	0.934415	23.4112	-0.839947	-0.105093	0.953897
23	0.211985	0.0116237	0.239214	-0.00728642	-0.000122938	0.00891238		23	21.1985	1.16237	23.9214	-0.728642	-0.0122938	0.891238
24	0.214772	0.0105726	0.242673	-0.00631216	-0.00151624	0.0100519		24	21.4772	1.05726	24.2673	-0.631216	-0.151624	1.00519
25	0.217587	0.00861443	0.252005	-0.00712647	-0.00198817	0.00904986		25	21.7587	0.861443	25.2005	-0.712647	-0.198817	0.904986
26	0.220805	0.00863786	0.251265	-0.00865989	-0.000186391	0.00955351		26	22.0805	0.863786	25.1265	-0.865989	-0.0186391	0.955351
27	0.227393	0.01233	0.256196	-0.0076592	0.000292144	0.00901813		27	22.7393	1.233	25.6196	-0.76592	0.0292144	0.901813
28	0.224154	0.00872656	0.266012	-0.00481046	-0.00194851	0.00860569		28	22.4154	0.872656	26.6012	-0.481046	-0.194851	0.860569
29	0.229937	0.0115685	0.264546	-0.00596582	-0.000927987	0.00852902		29	22.9937	1.15685	26.4546	-0.596582	-0.0927987	0.852902
30	0.23313	0.00707799	0.263534	-0.00709871	9.7822e-05	0.00692818		30	23.313	0.707799	26.3534	-0.709871	0.0097822	0.692818
31	0.236367	0.187283	0.298742	0.0488978	0.0195974	0.0460557		31	23.6367	18.7283	29.8742	4.88978	1.95974	4.60557
32	0.24143	0.211232	0.282683	0.0819365	0.0713968	0.049379		32	24.143	21.1232	28.2683	8.19365	7.13968	4.9379
33	0.245276	0.249043	0.278284	0.132701	0.110063	0.0836299		33	24.5276	24.9043	27.8284	13.2701	11.0063	8.36299
34	0.245356	0.274421	0.283324	0.164995	0.138545	0.113803		34	24.5356	27.4421	28.3324	16.4995	13.8545	11.3803
35	0.252398	0.283267	0.286266	0.186199	0.160501	0.137946		35	25.2398	28.3267	28.6266	18.6199	16.0501	13.7946
36	0.253807	0.300375	0.288944	0.204601	0.182398	0.159278		36	25.3807	30.0375	28.8944	20.4601	18.2398	15.9278
37	0.253753	0.305649	0.288227	0.220546	0.197281	0.17432		37	25.3753	30.5649	28.8227	22.0546	19.7281	17.432
38	0.258928	0.310523	0.292227	0.23171	0.209007	0.190393		38	25.8928	31.0523	29.2227	23.171	20.9007	19.0393
39	0.260816	0.314347	0.291853	0.24155	0.224396	0.204355		39	26.0816	31.4347	29.1853	24.155	22.4396	20.4355
40	0.262184	0.316396	0.297403	0.248965	0.231161	0.215781		40	26.2184	31.6396	29.7403	24.8965	23.1161	21.5781
41	0.267357	0.329417	0.296435	0.257007	0.23728	0.221863		41	26.7357	32.9417	29.6435	25.7007	23.728	22.1863
42	0.27726	0.332634	0.302254	0.264212	0.247763	0.230625		42	27.726	33.2634	30.2254	26.4212	24.7763	23.0625
43	0.270937	0.333553	0.300746	0.271036	0.258837	0.240119		43	27.0937	33.3553	30.0746	27.1036	25.8837	24.0119
44	0.279541	0.340823	0.302735	0.270322	0.259161	0.247291		44	27.9541	34.0823	30.2735	27.0322	25.9161	24.7291
45	0.29107	0.340286	0.305776	0.27578	0.260693	0.252767		45	29.107	34.0286	30.5776	27.578	26.0693	25.2767
46	0.295599	0.340415	0.308856	0.277324	0.266557	0.259704		46	29.5599	34.0415	30.8856	27.7324	26.6557	25.9704
47	0.304588	0.347166	0.311034	0.279193	0.269242	0.265067		47	30.4588	34.7166	31.1034	27.9193	26.9242	26.5067
48	0.311321	0.355501	0.316185	0.284071	0.274719	0.267658		48	31.1321	35.5501	31.6185	28.4071	27.4719	26.7658
49	0.306747	0.351232	0.324953	0.28456	0.274457	0.268293		49	30.6747	35.1232	32.4953	28.456	27.4457	26.8293
50	0.312034	0.35318	0.333913	0.286091	0.278514	0.274479		50	31.2034	35.318	33.3913	28.6091	27.8514	27.4479
51	0.319664	0.360184	0.341616	0.290427	0.2892	0.272548		51	31.9664	36.0184	34.1616	29.0427	28.92	27.2548
52	0.323576	0.356847	0.338201	0.28901	0.285874	0.278486		52	32.3576	35.6847	33.8201	28.901	28.5874	27.8486
53	0.328034	0.363737	0.341905	0.289914	0.286932	0.276122		53	32.8034	36.3737	34.1905	28.9914	28.6932	27.6122
54	0.321844	0.367157	0.342349	0.292095	0.285853	0.276769		54	32.1844	36.7157	34.2349	29.2095	28.5853	27.6769
55	0.327194	0.36475	0.353925	0.293183	0.28796	0.281497		55	32.7194	36.475	35.3925	29.3183	28.796	28.1497
56	0.335779	0.366651	0.360181	0.296907	0.287655	0.282304		56	33.5779	36.6651	36.0181	29.6907	28.7655	28.2304
57	0.35053	0.375692	0.369668	0.299768	0.289877	0.28372		57	35.053	37.5692	36.9668	29.9768	28.9877	28.372
58	0.355587	0.373532	0.372378	0.300972	0.292878	0.284803		58	35.5587	37.3532	37.2378	30.0972	29.2878	28.4803
59	0.352869	0.374715	0.375412	0.300705	0.294136	0.28872		59	35.2869	37.4715	37.5412	30.0705	29.4136	28.872
60	0.350674	0.378677	0.388197	0.302854	0.297657	0.288575		60	35.0674	37.8677	38.8197	30.2854	29.7657	28.8575

## Sheet: Figure B
	Ratio to MAX DATA								% MAX DATA
minutes	a	b	c	d	e	f		minutes	a	b	c	d	e	f
0	0.000900054	0	0	0.00265915	0.00457394	0.0061185		0	0.0900054	0	0	0.265915	0.457394	0.61185
1	0.02526	0.00145946	0.0101832	0.00384258	0.00620554	0.00926869		1	2.526	0.145946	1.01832	0.384258	0.620554	0.926869
2	0.0502628	0.00541201	0.0195987	0.00224475	0.00722399	0.00990003		2	5.02628	0.541201	1.95987	0.224475	0.722399	0.990003
3	0.0691973	0.00781661	0.0351028	0.00178229	0.00399197	0.00882442		3	6.91973	0.781661	3.51028	0.178229	0.399197	0.882442
4	0.0839638	0.00383567	0.0472762	0.00171604	0.00504939	0.00909851		4	8.39638	0.383567	4.72762	0.171604	0.504939	0.909851
5	0.0995069	0.00632877	0.0613383	0.00414136	0.0083048	0.00916347		5	9.95069	0.632877	6.13383	0.414136	0.83048	0.916347
6	0.115108	0.00792682	0.0729856	0.00293584	0.00758513	0.0108133		6	11.5108	0.792682	7.29856	0.293584	0.758513	1.08133
7	0.125543	0.00415294	0.0843119	0.00392701	0.00554952	0.0107028		7	12.5543	0.415294	8.43119	0.392701	0.554952	1.07028
8	0.138443	0.00251648	0.0964723	0.00474281	0.0063965	0.0115823		8	13.8443	0.251648	9.64723	0.474281	0.63965	1.15823
9	0.148444	0.00503128	0.102419	0.00444014	0.00442715	0.00872569		9	14.8444	0.503128	10.2419	0.444014	0.442715	0.872569
10	0.15957	0.00672786	0.111633	0.00221098	0.00656927	0.0118408		10	15.957	0.672786	11.1633	0.221098	0.656927	1.18408
11	0.166952	0.00465724	0.117483	0.0025825	0.00429854	0.0105521		11	16.6952	0.465724	11.7483	0.25825	0.429854	1.05521
12	0.168991	0.00426315	0.126836	0.00404263	0.00666021	0.00848277		12	16.8991	0.426315	12.6836	0.404263	0.666021	0.848277
13	0.179019	0.00558067	0.132197	0.00515331	0.00568462	0.00776699		13	17.9019	0.558067	13.2197	0.515331	0.568462	0.776699
14	0.184185	0.00459712	0.139733	0.0025903	0.00548457	0.0120123		14	18.4185	0.459712	13.9733	0.25903	0.548457	1.20123
15	0.190103	0.00550552	0.144102	0.00664202	0.00618086	0.00988444		15	19.0103	0.550552	14.4102	0.664202	0.618086	0.988444
16	0.193654	0.00344325	0.147979	0.00583142	0.00484414	0.00942328		16	19.3654	0.344325	14.7979	0.583142	0.484414	0.942328
17	0.190467	0.00490104	0.152818	0.00333725	0.00610421	0.011251		17	19.0467	0.490104	15.2818	0.333725	0.610421	1.1251
18	0.201584	0.00566583	0.155124	0.00218889	0.0038075	0.010304		18	20.1584	0.566583	15.5124	0.218889	0.38075	1.0304
19	0.207604	0.00505299	0.158789	0.00116135	0.00763319	0.00937781		19	20.7604	0.505299	15.8789	0.116135	0.763319	0.937781
20	0.212414	0.00696999	0.163993	0.00153417	0.00611201	0.0112289		20	21.2414	0.696999	16.3993	0.153417	0.611201	1.12289
21	0.21297	0.00335141	0.171206	0.00498444	0.00693171	0.0110237		21	21.297	0.335141	17.1206	0.498444	0.693171	1.10237
22	0.218242	0.00669613	0.172374	0.00241233	0.00475321	0.00989613		22	21.8242	0.669613	17.2374	0.241233	0.475321	0.989613
23	0.218787	0.00516487	0.174729	0.00432192	0.00672776	0.00975453		23	21.8787	0.516487	17.4729	0.432192	0.672776	0.975453
24	0.230065	0.00619685	0.181019	0.00192259	0.00686026	0.00940249		24	23.0065	0.619685	18.1019	0.192259	0.686026	0.940249
25	0.233286	0.0050029	0.186685	0.00166408	0.00520398	0.0123669		25	23.3286	0.50029	18.6685	0.166408	0.520398	1.23669
26	0.229586	0.00761456	0.185699	0.00252145	0.00655109	0.0132646		26	22.9586	0.761456	18.5699	0.252145	0.655109	1.32646
27	0.238102	0.00736408	0.189588	0.00527153	0.0070733	0.00917126		27	23.8102	0.736408	18.9588	0.527153	0.70733	0.917126
28	0.233541	0.00743087	0.190101	0.0036789	0.00801251	0.010178		28	23.3541	0.743087	19.0101	0.36789	0.801251	1.0178
29	0.240204	0.0068531	0.194102	0.00368149	0.00573918	0.00936352		29	24.0204	0.68531	19.4102	0.368149	0.573918	0.936352
30	0.24477	0.00623024	0.197238	0.00577426	0.00534038	0.00988574		30	24.477	0.623024	19.7238	0.577426	0.534038	0.988574
31	0.25462	0.157045	0.202716	0.0360238	0.0324826	0.0321696		31	25.462	15.7045	20.2716	3.60238	3.24826	3.21696
32	0.25701	0.236369	0.20669	0.0920127	0.0849849	0.0782415		32	25.701	23.6369	20.669	9.20127	8.49849	7.82415
33	0.258883	0.267769	0.207007	0.121722	0.127365	0.110667		33	25.8883	26.7769	20.7007	12.1722	12.7365	11.0667
34	0.255864	0.280864	0.207451	0.153011	0.152134	0.138164		34	25.5864	28.0864	20.7451	15.3011	15.2134	13.8164
35	0.260463	0.296076	0.210426	0.168459	0.173151	0.161565		35	26.0463	29.6076	21.0426	16.8459	17.3151	16.1565
36	0.256888	0.305572	0.214119	0.184331	0.185523	0.179454		36	25.6888	30.5572	21.4119	18.4331	18.5523	17.9454
37	0.264	0.309398	0.215131	0.19836	0.201792	0.189741		37	26.4	30.9398	21.5131	19.836	20.1792	18.9741
38	0.259044	0.314712	0.218136	0.210248	0.21917	0.208438		38	25.9044	31.4712	21.8136	21.0248	21.917	20.8438
39	0.269338	0.322356	0.218801	0.216731	0.22746	0.215369		39	26.9338	32.2356	21.8801	21.6731	22.746	21.5369
40	0.266581	0.325327	0.220556	0.226147	0.232737	0.222542		40	26.6581	32.5327	22.0556	22.6147	23.2737	22.2542
41	0.267373	0.333982	0.223216	0.229126	0.241793	0.229653		41	26.7373	33.3982	22.3216	22.9126	24.1793	22.9653
42	0.269552	0.336847	0.226993	0.233954	0.241031	0.234602		42	26.9552	33.6847	22.6993	23.3954	24.1031	23.4602
43	0.270716	0.33921	0.227681	0.238949	0.249571	0.242934		43	27.0716	33.921	22.7681	23.8949	24.9571	24.2934
44	0.275437	0.337221	0.228409	0.245974	0.255456	0.246189		44	27.5437	33.7221	22.8409	24.5974	25.5456	24.6189
45	0.276213	0.343183	0.231264	0.249532	0.259196	0.248707		45	27.6213	34.3183	23.1264	24.9532	25.9196	24.8707
46	0.27878	0.34692	0.233485	0.253766	0.263271	0.25373		46	27.878	34.692	23.3485	25.3766	26.3271	25.373
47	0.281709	0.348296	0.236235	0.253692	0.263827	0.257377		47	28.1709	34.8296	23.6235	25.3692	26.3827	25.7377
48	0.283335	0.35061	0.240309	0.257638	0.265551	0.2612		48	28.3335	35.061	24.0309	25.7638	26.5551	26.12
49	0.292025	0.351225	0.238194	0.264604	0.272505	0.265712		49	29.2025	35.1225	23.8194	26.4604	27.2505	26.5712
50	0.293099	0.349929	0.237679	0.263296	0.27274	0.271371		50	29.3099	34.9929	23.7679	26.3296	27.274	27.1371
51	0.289525	0.354094	0.243613	0.268389	0.276929	0.270092
52	0.290709	0.359466	0.247393	0.266533	0.27606	0.269475
53	0.294488	0.359367	0.246898	0.270795	0.279938	0.273847
54	0.299695	0.370637	0.250907	0.27559	0.284582	0.275551
55	0.297173	0.361503	0.248919	0.274397	0.282302	0.27681
56	0.301555	0.375209	0.251962	0.281085	0.285881	0.282147
57	0.299958	0.37477	0.253498	0.281007	0.285829	0.278737
58	0.308794	0.377156	0.257177	0.278964	0.289152	0.284978
59	0.309834	0.384749	0.263154	0.279332	0.290943	0.285465
60	0.307899	0.387314	0.260405	0.287296	0.295873	0.291162
61	0.315705	0.387793	0.263128	0.287396	0.29772	0.291258
