# Supplementary material for: HOPS recognizes each SNARE, assembling ternary trans-complexes for rapid fusion upon engagement with the 4th SNARE
Source: eLife. 2020 Jan 21;9:e53559. doi: 10.7554/eLife.53559 (PMC6994237; doi:10.7554/eLife.53559)
Supplement: Figure 10—source data 1. [file elife-53559-fig10-data1.xlsx]

## Sheet: Figure A and B
																										delta max	501	501	501	501	501	501	501	501	501	501	501	501	501	501	501	501	501	501	501	501	501	501	501
																										lowest val in 30' rep1	119.71	120.079	119.71	120.079	119.71	120.079	119.71	120.079	119.71	120.079	119.71	120.079	134.646	132.619	134.646	132.619	134.646	132.619	134.646	132.619	134.646	132.619	134.646
																										lowest val in 30' rep2	126.915	125.336	126.915	125.336	126.915	125.336	126.915	125.336	126.915	125.336	126.915	125.336	136.753	133.706	136.753	133.706	136.753	133.706	136.753	133.706	136.753	133.706	136.753
																										lowest val in 30' rep3	130.426	128.005	130.426	128.005	130.426	128.005	130.426	128.005	130.426	128.005	130.426	128.005	143.858	140.542	143.858	140.542	143.858	140.542	143.858	140.542	143.858	140.542	143.858
	I1	I2	I3	I4	I5	I6	I7	I8	I9	I10	I11	I12	I13	I14	I15	I16	I17	I18	I19	I20	I21	I22	I23	I24
0	134.841	130.265	135.159	188.52	134.766	183.696	138.411	193.44	145.68	208.223	143.414	217.4	147.618	143.325	144.758	155.702	148.048	165.807	141.953	164.77	141.086	185.568	143.719	190.185		0	3.02016	2.03313	3.08363	13.6609	3.00519	12.698	3.73273	14.6429	5.18363	17.5936	4.73134	19.4253	2.58922	2.13693	2.01836	4.60739	2.67505	6.62435	1.45848	6.41737	1.28543	10.5687	1.81098
1	124.527	124.574	131.065	211.993	131.992	212.03	134.726	222.739	140.423	219.26	150.563	244.487	142.047	140.034	141.878	188.162	141.518	196.432	141.557	199.332	141.445	215.486	147.909	218.34		1	0.961477	0.897206	2.26647	18.3461	2.4515	18.3535	2.99721	20.491	4.13433	19.7966	6.15828	24.8319	1.47725	1.48004	1.44351	11.0864	1.37166	12.7371	1.37944	13.316	1.35709	16.5403	2.64731
2	123.922	123.264	129.27	226.434	131.731	225.116	134.946	235.528	139.856	233.944	154.635	254.975	141.468	139.453	139.5	208.161	143.923	214.54	143.562	216.018	146.757	231.649	155.415	231.178		2	0.840719	0.635729	1.90818	21.2285	2.3994	20.9655	3.04112	23.0437	4.02116	22.7275	6.97106	26.9253	1.36168	1.36407	0.968862	15.0782	1.8517	16.3515	1.77964	16.6465	2.41737	19.7665	4.14551
3	123.752	125.073	128.85	232.919	128.663	236.99	135.307	247.552	141.934	244.474	159.982	262.421	137.293	140.53	141.657	222.805	144.975	228.957	146.666	230.13	149.748	242.37	163.285	242.862		3	0.806786	0.996806	1.82435	22.523	1.78703	23.3355	3.11317	25.4437	4.43593	24.8293	8.03832	28.4116	0.528343	1.57904	1.3994	18.0012	2.06168	19.2291	2.3992	19.4633	3.01437	21.9064	5.71637
4	122.769	124.458	127.075	242.508	128.367	243.396	134.908	253.352	144.321	250.567	166.741	268.622	139.523	138.728	144.094	231.735	147.493	238.907	150.372	240.941	154.076	247.29	171.007	252.68		4	0.610579	0.874052	1.47006	24.4369	1.72794	24.6142	3.03353	26.6014	4.91238	26.0455	9.38743	29.6493	0.973453	1.21936	1.88583	19.7836	2.56427	21.2152	3.13892	21.6212	3.87824	22.8884	7.25768
5	121.693	123.796	127.466	247.415	130.39	250.114	137.967	261.178	146.973	262.088	173.579	274.474	138.165	137.51	144.644	241.376	149.595	245.366	154.521	247.876	160.594	256.378	177.673	261.905		5	0.395808	0.741916	1.5481	25.4164	2.13174	25.9551	3.64411	28.1635	5.44172	28.3451	10.7523	30.8174	0.702395	0.976248	1.99561	21.708	2.98383	22.5044	3.96707	23.0054	5.17924	24.7024	8.58822
6	121.416	122.908	128.852	253.244	130.966	258.458	138.115	268.562	151.233	267.767	177.962	279.197	135.96	136.589	147.649	248.369	150.768	251.422	157.04	254.765	165.969	263.938	186.128	268.354		6	0.340519	0.564671	1.82475	26.5798	2.24671	27.6206	3.67365	29.6373	6.29202	29.4786	11.6271	31.7601	0.262275	0.792415	2.59541	23.1038	3.21796	23.7132	4.46986	24.3804	6.2521	26.2114	10.2758
7	122.239	122.04	127.496	260.427	129.813	263.944	139.783	272.466	154.123	274.096	184.962	286.971	137.821	136.277	149.34	256.682	156.913	262.205	162.06	264.866	171.784	272.286	193.76	277.533		7	0.50479	0.391417	1.55409	28.0136	2.01657	28.7156	4.00659	30.4166	6.86886	30.7419	13.0244	33.3118	0.633733	0.73014	2.93293	24.7631	4.44451	25.8655	5.47186	26.3966	7.41277	27.8776	11.7992
8	119.71	120.392	128.03	266.261	129.807	271.11	142.467	280.287	155.299	280.854	186.676	288.136	137.318	136.264	150.555	263.766	159.213	268.736	166.076	270.221	176.449	278.658	201.776	285.256		8	0	0.062475	1.66068	29.178	2.01537	30.1459	4.54232	31.9776	7.10359	32.0908	13.3665	33.5443	0.533333	0.727545	3.17545	26.177	4.90359	27.1691	6.27345	27.4655	8.34391	29.1495	13.3992
9	121.579	123.305	125.965	272.994	130.459	276.336	144.108	285.766	160.659	285.744	193.608	297.17	138.151	135.362	157.09	271.746	160.113	276.716	172.08	277.433	182.399	285.394	205.597	290.849		9	0.373054	0.643912	1.2485	30.522	2.14551	31.189	4.86986	33.0713	8.17345	33.0669	14.7501	35.3475	0.699601	0.547505	4.47984	27.7699	5.08323	28.7619	7.47186	28.905	9.53154	30.494	14.1619
10	121.155	120.079	127.425	277.15	132.075	280.803	145.241	291.337	165.089	291.223	197.793	302.835	135.514	136.36	159.5	276.67	164.982	281.832	172.389	284.581	187.838	290.48	212.515	297.647		10	0.288423	0	1.53992	31.3515	2.46806	32.0806	5.09601	34.1832	9.05768	34.1605	15.5854	36.4782	0.173253	0.746707	4.96088	28.7527	6.05509	29.783	7.53353	30.3317	10.6172	31.5092	15.5427
11	123.281	121.841	127.684	281.744	132.591	284.55	148.1	294.762	168.794	296.44	203.039	312.223	134.646	135.911	160.736	283.51	166.813	287.086	174.706	291.687	191.299	297.707	218.761	299.987		11	0.712774	0.351697	1.59162	32.2685	2.57106	32.8285	5.66667	34.8669	9.79721	35.2018	16.6325	38.3521	0	0.657086	5.20758	30.118	6.42056	30.8317	7.99601	31.7501	11.308	32.9517	16.7894
12	123.606	120.921	127.386	289.532	133.951	291.437	152.093	301.355	170.799	301.703	208.239	313.585	135.695	135.627	162.137	287.826	169.367	292.655	179.455	295.755	196.137	300	224.781	308.45		12	0.777645	0.168064	1.53214	33.823	2.84251	34.2032	6.46367	36.1828	10.1974	36.2523	17.6705	38.624	0.209381	0.600399	5.48723	30.9794	6.93034	31.9433	8.94391	32.5621	12.2737	33.4094	17.991
13	121.827	122.362	130.081	291.967	132.419	293.077	152.249	304.824	175.357	306.069	212.816	320.955	137.302	136.564	165.86	290.305	173.634	296.832	183.697	300.569	201.472	308.158	230.302	316.046		13	0.422555	0.455689	2.07006	34.309	2.53673	34.5305	6.49481	36.8752	11.1072	37.1238	18.584	40.095	0.53014	0.787425	6.23034	31.4743	7.78204	32.777	9.79062	33.523	13.3385	35.0377	19.093
14	120.856	121.627	130.448	296.41	136.955	301.679	155.072	307.186	179.258	311.478	217.006	321.004	136.301	136.046	169.36	295.299	177.758	302.042	188.531	308.836	209.381	313.672	237.451	321.722		14	0.228743	0.308982	2.14331	35.1958	3.44212	36.2475	7.05828	37.3467	11.8858	38.2034	19.4204	40.1048	0.330339	0.684032	6.92894	32.4711	8.60519	33.817	10.7555	35.1731	14.9172	36.1383	20.52
15	121.574	121.706	127.698	303.422	136.937	301.954	155.731	313.201	183.38	317.051	221.801	325.525	135.957	137.132	172.733	301.927	180.794	305.55	189.441	315.156	208.73	320.819	239.025	327.316		15	0.372056	0.32475	1.59441	36.5954	3.43852	36.3024	7.18982	38.5473	12.7086	39.3158	20.3774	41.0072	0.261677	0.900798	7.6022	33.794	9.21118	34.5172	10.9371	36.4345	14.7872	37.5649	20.8341
16	120.947	122.752	128.424	303.82	139.618	309.493	158.063	315.952	185.122	318.882	225.348	331.903	136.197	133.483	172.476	310.257	176.18	314.426	185.514	319.337	216.258	326.024	246.108	330.88		16	0.246906	0.533533	1.73932	36.6749	3.97365	37.8072	7.65529	39.0964	13.0563	39.6812	21.0854	42.2802	0.309581	0.172455	7.5509	35.4567	8.29022	36.2888	10.1533	37.2691	16.2898	38.6038	22.2479
17	120.969	121.567	129.247	308.65	139.849	308.6	159.789	319.161	187.647	324.902	231.073	332.695	140.714	135.702	173.642	317.724	182.726	322.809	189.055	322.333	224.329	331.072	255.729	337.067		17	0.251297	0.297006	1.90359	37.6389	4.01976	37.6289	7.9998	39.7369	13.5603	40.8828	22.2281	42.4383	1.21118	0.615369	7.78363	36.9471	9.59681	37.9621	10.8601	37.8671	17.9008	39.6114	24.1683
18	122.739	122.618	129.224	310.536	137.927	313.583	160.746	323.486	188.021	327.456	233.811	340.445	139.867	135.9	176.314	324.386	186.736	326.361	195.794	328.251	223.049	336.825	256.26	342.014		18	0.604591	0.506786	1.899	38.0154	3.63613	38.6236	8.19082	40.6002	13.6349	41.3926	22.7747	43.9852	1.04212	0.65489	8.31697	38.2768	10.3972	38.6711	12.2052	39.0483	17.6453	40.7597	24.2743
19	121.714	120.887	131.714	314.127	139.522	315.517	164.106	325.85	191.595	329.191	230.372	343.864	139.02	133.636	179.815	330.145	190.122	331.837	200.558	334.535	227.944	340.051	258.654	347.78		19	0.4	0.161277	2.39601	38.7321	3.95449	39.0096	8.86148	41.0721	14.3483	41.7389	22.0882	44.6677	0.873054	0.202994	9.01577	39.4263	11.0731	39.7641	13.1561	40.3026	18.6224	41.4036	24.7521
20	121.665	121.25	130.197	316.098	138.85	322.952	166.816	330.941	200.725	336.141	229.31	347.073	137.89	134.857	181.811	335.422	192.891	337.982	206.967	338.461	229.263	346.721	267.845	347.423		20	0.39022	0.233733	2.09321	39.1255	3.82036	40.4936	9.4024	42.0882	16.1707	43.1261	21.8762	45.3082	0.647505	0.446707	9.41417	40.4796	11.6257	40.9906	14.4353	41.0862	18.8856	42.7349	26.5866
21	123.473	123.26	130.643	318.395	141.124	323.222	167.211	331.836	199.898	336.855	236.423	353.38	137.844	134.23	184.924	338.738	197.029	340.832	209.093	340.399	232.739	348.573	270.804	351.106		21	0.751098	0.63493	2.18224	39.584	4.27425	40.5475	9.48124	42.2669	16.0056	43.2687	23.296	46.5671	0.638323	0.321557	10.0355	41.1415	12.4517	41.5595	14.8597	41.4731	19.5794	43.1046	27.1772
22	121.747	121.307	131.035	320.882	140.895	324.687	169.587	332.138	204.862	343	238.898	354.247	137.189	135.776	190.428	338.119	199.427	347.826	211.708	343.191	235.128	349.401	274.576	356.78		22	0.406587	0.24511	2.26048	40.0804	4.22854	40.8399	9.95549	42.3271	16.9964	44.4952	23.79	46.7401	0.507585	0.63014	11.1341	41.018	12.9303	42.9555	15.3816	42.0303	20.0563	43.2699	27.9301
23	123.224	122.44	131.748	325.942	143.848	328.219	172.279	337.547	207.465	345.303	247.314	356.97	137.915	133.601	191.887	341.624	201.761	347.084	217.29	345.72	239.456	354.839	278.929	356.946		23	0.701397	0.471257	2.40279	41.0904	4.81796	41.5449	10.4928	43.4068	17.516	44.9549	25.4699	47.2836	0.652495	0.196008	11.4253	41.7176	13.3962	42.8074	16.4958	42.5351	20.9202	44.3553	28.799
24	124.5	121.764	132.32	326.451	143.677	330.195	174.202	342.841	211.848	350.061	259.213	361.739	137.235	132.619	194.694	347.97	206.809	351.016	219.35	350.089	246.703	356.625	287.48	362.314		24	0.956088	0.336327	2.51697	41.192	4.78383	41.9393	10.8766	44.4635	18.3908	45.9046	27.8449	48.2355	0.516766	0	11.9856	42.9842	14.4038	43.5922	16.907	43.4072	22.3667	44.7118	30.5058
25	123.735	122.964	131.726	329.148	145.06	332.258	175.105	343.269	213.545	349.136	266.178	361.76	137.507	134.654	197.25	352.01	208.81	355.593	220.891	351.75	250.679	357.329	294.88	364.407		25	0.803393	0.575848	2.3984	41.7303	5.05988	42.3511	11.0569	44.5489	18.7295	45.72	29.2351	48.2397	0.571058	0.406188	12.4958	43.7906	14.8032	44.5058	17.2146	43.7387	23.1603	44.8523	31.9828
26	122.515	122.882	134.442	329.723	147.191	339.23	179.211	345.81	217.508	352.812	269.391	366.997	138.329	133.83	198.808	357.489	209.877	359.598	228.016	355.513	255.004	361.804	299.54	367.926		26	0.55988	0.559481	2.94052	41.8451	5.48523	43.7427	11.8764	45.0561	19.5206	46.4537	29.8764	49.285	0.73513	0.241717	12.8068	44.8842	15.0162	45.3052	18.6367	44.4898	24.0236	45.7455	32.913
27	123.226	122.592	135.108	335.023	146.793	339.021	175.78	352.054	219.64	354.61	273.074	369.084	138.231	133.944	200.845	357.847	213.441	361.802	228.529	355.626	260.63	362.295	305.93	371.833		27	0.701796	0.501597	3.07345	42.903	5.40579	43.701	11.1916	46.3024	19.9461	46.8126	30.6116	49.7016	0.715569	0.264471	13.2134	44.9557	15.7275	45.7451	18.7391	44.5124	25.1465	45.8435	34.1884
28	123.293	122.907	134.017	336.122	148.16	340.543	181.017	353.181	222.446	356.842	278.169	370.914	138.288	134.42	202.723	358.829	215.763	362.54	234.742	359.791	264.275	366.485	309.808	373.122		28	0.71517	0.564471	2.85569	43.1224	5.67864	44.0048	12.2369	46.5273	20.5062	47.2581	31.6285	50.0669	0.726946	0.359481	13.5882	45.1517	16.191	45.8924	19.9792	45.3437	25.8741	46.6798	34.9625
29	124.338	121.818	135.708	337.3	147.265	342.94	183.073	354.157	227.711	356.487	286.642	368.78	138.266	136.045	202.523	362.477	221.841	364.797	237.866	362.249	269.958	364.922	317.474	377.929		29	0.923752	0.347106	3.19321	43.3575	5.5	44.4832	12.6473	46.7222	21.5571	47.1872	33.3198	49.6409	0.722555	0.683832	13.5483	45.8798	17.4042	46.3429	20.6028	45.8343	27.0084	46.3679	36.4926
30	122.27	123.241	135.491	335.264	148.774	342.467	182.93	354.785	227.884	361.487	289.43	374.681	138.583	134.232	207.109	364.923	221.272	366.526	240.767	365.987	275.872	368.753	323.158	379.94		30	0.510978	0.631138	3.1499	42.9511	5.8012	44.3888	12.6188	46.8475	21.5916	48.1852	33.8762	50.8188	0.785828	0.321956	14.4637	46.3681	17.2906	46.688	21.1818	46.5804	28.1888	47.1325	37.6271
31	123.356	123.833	136.238	341.145	149.91	343.514	186	355.513	232.559	362.575	297.704	377.02	138.74	135.126	209.08	367.254	225.175	366.872	245.393	366.251	278.159	369.766	328.677	380.168		31	0.727745	0.749301	3.299	44.125	6.02794	44.5978	13.2315	46.9928	22.5248	48.4024	35.5277	51.2856	0.817166	0.500399	14.8571	46.8333	18.0697	46.7571	22.1052	46.6331	28.6453	47.3347	38.7287
32	123.132	123.755	134.473	341.609	150.809	349.84	187.77	360.617	233.879	364.764	300.057	379.49	138.413	133.51	211.616	368.79	228.169	371.725	252.817	369.266	281.522	371.278	332.389	383.561		32	0.683034	0.733733	2.94671	44.2176	6.20739	45.8605	13.5848	48.0116	22.7882	48.8393	35.9974	51.7786	0.751896	0.177844	15.3633	47.1399	18.6673	47.7257	23.587	47.2349	29.3166	47.6365	39.4697
33	124.288	123.838	134.56	341.075	150.478	347.808	187.686	360.717	239.035	367.59	303.675	377.427	139.902	134.4	216.187	370.485	234.712	372.811	253.083	371.327	285.099	375.728	333.837	381.952		33	0.913772	0.750299	2.96407	44.111	6.14132	45.4549	13.5681	48.0315	23.8174	49.4034	36.7196	51.3669	1.0491	0.355489	16.2756	47.4782	19.9733	47.9425	23.6401	47.6463	30.0305	48.5248	39.7587
34	122.937	121.61	136.446	344.498	151.986	351.318	190.282	361.175	243.748	371.15	309.396	384.468	138.989	134.639	219.69	371.693	237.659	377.756	256.795	368.547	291.955	376.979	341.893	386.373		34	0.644112	0.305589	3.34052	44.7942	6.44232	46.1555	14.0862	48.123	24.7581	50.114	37.8615	52.7723	0.866866	0.403194	16.9749	47.7194	20.5615	48.9295	24.381	47.0914	31.399	48.7745	41.3667
35	121.241	123.294	135.024	345.445	154.161	351.985	192.7	362.947	245.643	371.804	315.424	382.155	139.306	135.389	222.071	372.967	239.785	376.351	262.178	370.645	294.548	378.501	343.86	391.024		35	0.305589	0.641717	3.05669	44.9832	6.87645	46.2886	14.5689	48.4766	25.1363	50.2445	39.0647	52.3106	0.93014	0.552894	17.4501	47.9737	20.9858	48.6491	25.4555	47.5102	31.9166	49.0782	41.7593
36	121.128	122.744	137.302	348.842	153.578	353.87	192.815	363.278	248.654	371.696	319.909	385.436	138.846	132.55	224.882	374.211	246.544	378.686	265.488	376.85	301.624	381.632	346.927	392.003		36	0.283034	0.531936	3.51138	45.6613	6.76008	46.6649	14.5918	48.5427	25.7373	50.223	39.9599	52.9655	0.838323	-0.0137725	18.0112	48.222	22.3349	49.1152	26.1162	48.7487	33.3289	49.7032	42.3715
37	120.168	121.618	135.969	347.843	155.169	352.788	195.696	364.596	247.51	375.379	321.705	388.075	138.193	135.116	226.971	376.193	243.444	381.748	269.348	376.687	304.871	379.965	350.888	393.753		37	0.0914172	0.307186	3.24531	45.4619	7.07764	46.4489	15.1669	48.8058	25.509	50.9581	40.3184	53.4922	0.707984	0.498403	18.4281	48.6176	21.7162	49.7263	26.8866	48.7162	33.977	49.3705	43.1621
38	121.936	123.831	137.391	350.625	155.979	356.512	193.585	368.271	249.758	372.668	323.944	390.776	140.571	135.555	228.745	380.689	250.726	383.194	274.395	379.622	310.391	388.091	355.996	395.785		38	0.444311	0.748902	3.52914	46.0172	7.23932	47.1922	14.7455	49.5393	25.9577	50.417	40.7653	54.0313	1.18263	0.586028	18.7822	49.515	23.1697	50.015	27.894	49.302	35.0788	50.9924	44.1816
39	119.729	121.812	136.919	352.706	155.651	356.684	196.289	373.128	257.05	373.529	326.896	389.412	139.077	134.137	231.953	381.471	254.455	385.832	278.642	382.062	310.67	388.054	354.612	397.61		39	0.00379242	0.345908	3.43493	46.4325	7.17385	47.2265	15.2852	50.5088	27.4132	50.5888	41.3545	53.7591	0.884431	0.302994	19.4226	49.6711	23.914	50.5415	28.7417	49.789	35.1345	50.985	43.9054
40	119.492	122.594	137.143	353.4	156.322	358.113	198.25	372.239	259.06	379.306	332.246	390.824	139.394	134.517	236.872	384.878	256.414	388.318	281.677	383.675	313.052	389.781	360.886	401.146		40	-0.043513	0.501996	3.47964	46.5711	7.30778	47.5118	15.6766	50.3313	27.8144	51.7419	42.4224	54.0409	0.947705	0.378842	20.4044	50.3511	24.305	51.0377	29.3475	50.111	35.61	51.3297	45.1577
41	119.923	122.94	137.024	355.435	157.338	355.155	198.057	370.403	262.932	379.866	333.009	390.734	137.47	134.885	239.083	381.25	259.721	388.1	286.066	383.523	317.239	393.347	357.913	400.723		41	0.042515	0.571058	3.45589	46.9772	7.51058	46.9214	15.6381	49.9649	28.5872	51.8537	42.5747	54.023	0.563673	0.452295	20.8457	49.6269	24.9651	50.9942	30.2236	50.0806	36.4457	52.0415	44.5643
42	120.265	123.578	137.161	357.173	157.802	360.467	200.663	374.082	262.399	379.684	335.244	390.668	139.382	134.597	242.239	387.898	264.912	388.606	290.926	386.428	318.297	390.725	359.672	401.684		42	0.110778	0.698403	3.48323	47.3242	7.60319	47.9816	16.1583	50.6992	28.4808	51.8174	43.0208	54.0098	0.945309	0.39481	21.4756	50.9539	26.0012	51.0952	31.1936	50.6605	36.6569	51.5182	44.9154
43	118.469	124.008	137.98	354.975	158.52	360.387	200.272	375.924	262.331	381.854	339.398	394.182	139.927	134.761	245.362	387.765	267.657	390.551	295.063	384.259	320.002	394.948	356.891	403.337		43	-0.247705	0.784232	3.64671	46.8854	7.74651	47.9657	16.0802	51.0669	28.4673	52.2505	43.8499	54.7112	1.05409	0.427545	22.099	50.9273	26.5491	51.4834	32.0194	50.2275	36.9972	52.3611	44.3603
44	119.06	123.38	137.777	357.967	157.832	366.117	202.476	375.51	267.313	384.204	342.477	398.162	139.488	136.397	246.729	388.089	268.839	389.989	296.572	386.786	322.832	392.714	361.202	404.134		44	-0.129741	0.658882	3.60619	47.4826	7.60918	49.1094	16.5202	50.9842	29.4617	52.7196	44.4645	55.5056	0.966467	0.754092	22.3719	50.992	26.785	51.3713	32.3206	50.7319	37.5621	51.9152	45.2208
45	117.688	123.603	137.73	359.772	157.657	363.677	204.641	377.34	269.175	386.164	342.51	396.983	141.577	136.582	248.451	390.348	269.521	393.849	302.588	390.687	324.101	393.516	364.878	402.801		45	-0.403593	0.703393	3.59681	47.8429	7.57425	48.6224	16.9523	51.3495	29.8333	53.1108	44.4711	55.2703	1.38343	0.791018	22.7156	51.4429	26.9212	52.1417	33.5214	51.5106	37.8154	52.0752	45.9545
46	117.693	124.848	137.983	360.96	157.614	367.432	204.356	377.086	267.186	385.31	345.332	397.873	140.906	135.424	249.43	391	273.678	393.579	302.187	391.581	326.769	397.667	358.553	406.94		46	-0.402595	0.951896	3.64731	48.08	7.56567	49.3719	16.8954	51.2988	29.4363	52.9403	45.0343	55.4479	1.2495	0.55988	22.911	51.5731	27.7509	52.0878	33.4413	51.689	38.3479	52.9038	44.692
47	117.847	123.571	139.759	361.618	162.124	367	207.176	378.477	270.442	386.113	341.693	399.531	139.162	133.992	253.416	392.172	275.033	396.277	305.673	392.357	323.231	399.126	357.43	408.049		47	-0.371856	0.697006	4.0018	48.2114	8.46587	49.2856	17.4583	51.5764	30.0862	53.1006	44.308	55.7788	0.901397	0.274052	23.7066	51.807	28.0214	52.6263	34.1371	51.8439	37.6417	53.195	44.4679
48	117.651	124.307	139.473	364.42	160.517	367.688	210.171	382.707	271.877	387.998	347.862	400.089	137.806	135.121	258.352	391.899	277.141	395.387	306.001	394.633	324.982	398.102	360.875	411.399		48	-0.410978	0.843912	3.94471	48.7707	8.14511	49.423	18.0561	52.4208	30.3727	53.4768	45.5393	55.8902	0.630739	0.499401	24.6918	51.7525	28.4421	52.4487	34.2026	52.2982	37.9912	52.9906	45.1555
49	115.189	124.253	139.665	366.391	163.737	365.953	211.444	381.031	268.14	389.524	347.524	399.924	139.595	133.42	256.387	395.417	279.997	400.122	311.355	394.008	332.369	399.715	360.016	406.997		49	-0.902395	0.833134	3.98303	49.1641	8.78782	49.0766	18.3102	52.0862	29.6267	53.7814	45.4719	55.8573	0.987824	0.15988	24.2996	52.4547	29.0122	53.3938	35.2713	52.1735	39.4657	53.3126	44.984
50	117.093	125.338	139.396	364.371	160.143	372.824	207.164	384.29	273.696	390.125	348.189	403.482	139.812	136.2	260.033	393.82	283.738	400.887	313.607	393.794	331.315	403.168	360.682	412.772		50	-0.522355	1.0497	3.92934	48.7609	8.07046	50.4481	17.4559	52.7367	30.7357	53.9014	45.6046	56.5675	1.03114	0.71477	25.0273	52.1359	29.7589	53.5465	35.7208	52.1307	39.2553	54.0018	45.117
51	116.703	122.587	139.975	363.741	161.731	372.758	212.341	383.892	276.983	392.804	352.526	402.032	139.173	135.167	260.907	396.844	282.954	398.395	309.491	393.472	330.999	403.709	359.337	414.863		51	-0.6002	0.500599	4.04491	48.6351	8.38743	50.4349	18.4892	52.6573	31.3918	54.4361	46.4703	56.278	0.903593	0.508583	25.2018	52.7395	29.6024	53.0491	34.8992	52.0665	39.1922	54.1098	44.8485
52	116.221	124.138	139.643	366.937	160.004	372.401	213.754	384.913	276.798	391.871	346.046	403.42	140.379	134.558	261.904	398.449	288.928	398.969	311.222	399.007	324.225	403.873	354.502	417.62		52	-0.696407	0.81018	3.97864	49.2731	8.04271	50.3637	18.7713	52.8611	31.3549	54.2499	45.1768	56.5551	1.14431	0.387026	25.4008	53.0599	30.7948	53.1637	35.2447	53.1713	37.8401	54.1425	43.8834
53	112.461	124.629	138.882	367.596	160.802	373.714	213.612	385.78	277.515	392.259	352.386	405.417	138.841	134.178	261.616	398.622	285.482	400.436	314.738	398.197	322.005	405.548	348.734	413.504		53	-1.44691	0.908184	3.82675	49.4046	8.202	50.6257	18.7429	53.0341	31.498	54.3273	46.4423	56.9537	0.837325	0.311178	25.3433	53.0944	30.107	53.4565	35.9465	53.0096	37.397	54.4768	42.7321
54	114.036	124.991	141.254	367.578	163.45	375	211.781	384.956	280.855	393.4	352.5	407.638	138.738	136.968	259.643	399.488	284.821	403.37	314.082	396.608	320.725	406.131	358.519	419.636		54	-1.13253	0.980439	4.3002	49.401	8.73054	50.8824	18.3774	52.8697	32.1647	54.5551	46.4651	57.397	0.816766	0.868064	24.9495	53.2673	29.975	54.0421	35.8156	52.6924	37.1415	54.5932	44.6852
55	115.143	124.122	138.579	368.344	161.209	377.714	216.449	387.545	285.191	395.327	353.838	407.468	138.942	133.76	261.767	399.369	289.04	401.898	311.045	400.777	323.299	406.058	356.681	414.828		55	-0.911577	0.806986	3.76627	49.5539	8.28323	51.4242	19.3092	53.3864	33.0301	54.9397	46.7321	57.3631	0.857485	0.227745	25.3735	53.2435	30.8172	53.7483	35.2094	53.5246	37.6553	54.5786	44.3184
56	116.814	126.677	138.94	368.437	162.223	377.486	211.891	387.411	286.446	396.715	350.626	406.317	140.016	136.689	263.416	401.431	280.966	403.852	311.322	399.955	327.04	409.917	342.38	418.638		56	-0.578044	1.31697	3.83832	49.5725	8.48563	51.3786	18.3994	53.3597	33.2806	55.2168	46.091	57.1333	1.07186	0.812375	25.7026	53.6551	29.2056	54.1383	35.2647	53.3605	38.402	55.3489	41.4639
57	113.464	123.081	136.868	367.962	160.947	377.691	214.767	389.117	281.366	393.636	350.776	405.769	139.918	135.46	263.637	401.456	287.995	406.517	313.968	401.132	323.596	407.632	339.77	417.522		57	-1.24671	0.599202	3.42475	49.4776	8.23094	51.4196	18.9735	53.7002	32.2667	54.6022	46.121	57.024	1.0523	0.567066	25.7467	53.6601	30.6086	54.6703	35.7928	53.5954	37.7146	54.8928	40.9429
58	114.749	125.054	141.07	370.198	162.575	376.322	217.02	387.423	275.203	395.93	352.371	405.845	138.601	134.034	265.032	401.601	279.743	407.26	310.48	402.016	321.814	411.256	345.614	422.185		58	-0.99022	0.993014	4.26347	49.924	8.55589	51.1463	19.4232	53.3621	31.0365	55.0601	46.4393	57.0391	0.789421	0.282435	26.0251	53.689	28.9615	54.8186	35.0966	53.7719	37.3589	55.6162	42.1094
59	111.715	123.727	141.348	371.666	164.144	378.861	219.27	390.745	282.345	396.427	348.542	409.918	138.565	134.955	269.098	403.786	296.813	407.953	315.437	399.902	327.73	412.34	358.423	423.689		59	-1.59581	0.728144	4.31896	50.217	8.86906	51.6531	19.8723	54.0251	32.4621	55.1593	45.675	57.8521	0.782236	0.466267	26.8367	54.1251	32.3687	54.9569	36.086	53.3499	38.5397	55.8325	44.6661
60	114.395	124.137	145.246	369.773	168.562	379.043	213.367	392.462	278.581	398.045	354.595	408.984	139.346	133.474	264.72	403.517	287.415	406.797	317.389	400.726	332.799	411.859	375.717	424.694		60	-1.06088	0.80998	5.09701	49.8391	9.7509	51.6894	18.694	54.3679	31.7108	55.4822	46.8832	57.6657	0.938124	0.170659	25.9629	54.0715	30.4928	54.7261	36.4756	53.5144	39.5515	55.7365	48.118
MIN in 30'	119.71	120.079											134.646	132.619
	D1	D2	D3	D4	D5	D6	D7	D8	D9	D10	D11	D12	D13	D14	D15	D16	D17	D18	D19	D20	D21	D22	D23	D24
0	144.016	150.756	142.889	165.503	152.109	162.161	141.572	157.865	147.654	170.236	154.866	167.964	143.483	149.854	142.92	157.662	145.499	164.071	150.29	170.606	148.57	155.97	148.625	157.792		0	3.41337	5.07385	3.18842	8.01737	5.02874	7.3503	2.92555	6.49281	4.13952	8.96208	5.57904	8.50858	1.34331	3.22315	1.23094	4.78164	1.74571	6.06088	2.702	7.36527	2.35868	4.44391	2.36966
1	134.372	141.088	138.645	177.522	147.949	168.966	139.469	171.671	146.531	179.787	160.298	185.507	141.852	145.434	142.913	158.967	144.961	169.245	151.672	170.175	151.831	168.518	151.37	174.328		1	1.48842	3.14411	2.34132	10.4164	4.1984	8.70858	2.50579	9.2485	3.91537	10.8685	6.66327	12.0102	1.01776	2.34092	1.22954	5.04212	1.63832	7.09361	2.97784	7.27924	3.00958	6.9485	2.91756
2	133.579	141.82	137.622	189.01	145.97	179.976	138.376	187.415	146.957	201.353	164.419	207.037	140.69	144.203	141.342	167.346	145.946	180.639	152.223	183.897	156.54	186.894	160.853	196.109		2	1.33014	3.29022	2.13713	12.7094	3.80339	10.9062	2.28762	12.391	4.0004	15.1731	7.48583	16.3076	0.785828	2.09521	0.915968	6.71457	1.83493	9.36786	3.08782	10.0182	3.9495	10.6164	4.81038
3	132.743	138.51	137.115	196.997	143.389	195.282	138.941	202.554	148.903	217.052	171.011	224.533	140.158	142.937	145.607	176.32	149.639	194.059	155.18	201.985	162.416	205.701	167.299	215.5		3	1.16327	2.62954	2.03593	14.3036	3.28822	13.9613	2.4004	15.4128	4.38882	18.3066	8.8016	19.7998	0.679641	1.84251	1.76727	8.50579	2.57206	12.0465	3.67804	13.6285	5.12236	14.3703	6.09701
4	130.226	136.977	137.76	202.641	144.192	201.01	140.51	214.903	152.165	231.107	178.135	238.121	140.16	139.901	146.493	188.447	152.303	209.584	161.289	214.374	168.681	219.751	175.839	232.653		4	0.660878	2.32355	2.16467	15.4301	3.4485	15.1046	2.71357	17.8776	5.03992	21.112	10.2236	22.512	0.68004	1.23653	1.94411	10.9263	3.10379	15.1453	4.89741	16.1014	6.37285	17.1747	7.8016
5	131.847	134.847	135.221	207.375	143.556	208.728	140.175	221.779	153.86	242.984	187.91	240.903	140.509	138.223	148.698	199.964	156.979	220.9	166.085	228.237	175.511	237.585	180.826	245.3		5	0.984431	1.8984	1.65788	16.375	3.32156	16.6451	2.64671	19.2501	5.37824	23.4826	12.1747	23.0673	0.749701	0.901597	2.38423	13.2251	4.03713	17.404	5.85469	18.8685	7.73613	20.7343	8.79701
6	130.256	134.992	135.051	214.264	140.869	215.079	142.05	228.55	158.369	250.545	191.584	252.811	139.99	137.955	151.909	209.365	161.149	229.492	171.431	238.63	181.156	250.366	189.75	254.844		6	0.666866	1.92735	1.62395	17.7501	2.78523	17.9128	3.02096	20.6016	6.27824	24.9918	12.908	25.4441	0.646108	0.848104	3.02515	15.1016	4.86946	19.119	6.92176	20.9429	8.86287	23.2854	10.5782
7	129.211	136.126	133.533	213.667	142.086	218.74	143.208	231.545	162.407	259.83	199.248	259.015	137.121	137.741	154.553	216.339	166.582	238.582	178.437	247.759	188.016	256.448	195.661	262.697		7	0.458283	2.15369	1.32096	17.6309	3.02814	18.6435	3.2521	21.1994	7.08423	26.8451	14.4377	26.6824	0.0734531	0.805389	3.55289	16.4936	5.95389	20.9333	8.32016	22.7651	10.2321	24.4994	11.7581
8	129.491	135.174	134.912	216.903	143.9	224.178	145.259	238.141	166.551	264.437	203.249	264.793	137.7	136.524	158.853	223.403	171.41	247.575	182.591	255.674	193.14	265.85	202.925	270.084		8	0.514172	1.96367	1.59621	18.2768	3.39022	19.7289	3.66148	22.516	7.91138	27.7647	15.2363	27.8357	0.189022	0.562475	4.41118	17.9036	6.91756	22.7283	9.1493	24.3449	11.2549	26.376	13.208
9	131.244	134.52	135.741	221.352	144.752	228.675	147.204	245.546	168.835	270.603	209.286	268.75	138.089	135.442	161.172	231.784	172.238	257.227	186.857	264.523	199.801	274.916	210.911	277.682		9	0.864072	1.83313	1.76168	19.1649	3.56028	20.6265	4.0497	23.994	8.36727	28.9954	16.4413	28.6255	0.266667	0.346507	4.87405	19.5764	7.08283	24.6549	10.0008	26.1112	12.5844	28.1856	14.802
10	131.479	131.829	136.363	225.493	145.583	229.63	149.051	248.719	172.604	275.046	214.122	274.795	138.826	136.306	165.186	236.823	177.49	264.202	193.606	271.092	205.143	282.572	215.413	287.329		10	0.910978	1.29601	1.88583	19.9914	3.72615	20.8172	4.41836	24.6273	9.11956	29.8822	17.4066	29.8321	0.413772	0.518962	5.67525	20.5822	8.13114	26.0471	11.3479	27.4224	13.6507	29.7138	15.7006
11	129.059	130.254	135.944	226.79	145.775	232.871	151.24	252.731	178.323	280.138	219.798	274.578	139.901	140.145	168.633	242.423	183.902	268.18	196.762	276.099	210.746	289.252	223.596	296.582		11	0.427944	0.981637	1.8022	20.2503	3.76447	21.4641	4.85529	25.4281	10.2611	30.8986	18.5395	29.7888	0.628343	1.28523	6.36327	21.7	9.41098	26.8411	11.9778	28.4218	14.7691	31.0471	17.3339
12	129.759	129.889	137.147	230.566	146.79	229.968	154.64	254.69	180.621	281.871	225.162	278.463	138.37	139.401	170.897	245.192	186.891	272.322	200.798	281.673	217.267	296.25	226.415	299.51		12	0.567665	0.908782	2.04232	21.004	3.96707	20.8846	5.53393	25.8192	10.7198	31.2445	19.6102	30.5643	0.322754	1.13673	6.81517	22.2527	10.0076	27.6679	12.7834	29.5343	16.0707	32.4439	17.8966
13	126.915	129.532	139.025	232.309	147.073	235.934	158.755	255.911	183.604	288.764	229.846	283.07	138.089	138.334	177.049	253.977	189.228	279.759	207.228	287.354	225.471	303.836	232.577	306.708		13	0	0.837525	2.41717	21.3519	4.02355	22.0754	6.35529	26.0629	11.3152	32.6204	20.5451	31.4838	0.266667	0.923752	8.04311	24.0062	10.4741	29.1523	14.0669	30.6683	17.7082	33.9581	19.1265
14	127.322	128.841	139.041	236.989	148.428	237.205	159.392	259.321	187.463	291.333	236.392	286.996	139.102	137.86	182.368	260.245	191.439	289.017	213.092	294.976	228.692	308.602	241.248	314.094		14	0.0812375	0.699601	2.42036	22.286	4.29401	22.3291	6.48244	26.7435	12.0854	33.1331	21.8517	32.2675	0.468862	0.829142	9.10479	25.2573	10.9154	31.0002	15.2373	32.1896	18.3511	34.9094	20.8573
15	129.308	129.605	138.488	244.92	148.482	243.717	161.124	262.955	192.459	292.866	241.886	291.998	136.753	134.075	181.741	273.716	199.404	291.805	213.875	297.76	229.556	312.163	243.676	315.903		15	0.477645	0.852096	2.30998	23.8691	4.30479	23.6289	6.82814	27.4689	13.0826	33.4391	22.9483	33.2659	0	0.0736527	8.97964	27.9461	12.5052	31.5567	15.3936	32.7453	18.5236	35.6202	21.3419
16	129.332	127.234	138.544	247.24	150.725	248.772	164.022	266.848	192.927	292.803	247.202	292.744	140.616	134.791	186.048	280.439	203.77	299.52	224.788	304.024	241.708	316.769	249.692	321.239		16	0.482435	0.378842	2.32116	24.3321	4.7525	24.6379	7.40659	28.2459	13.176	33.4265	24.0094	33.4148	0.771058	0.216567	9.83932	29.288	13.3766	33.0966	17.5719	33.9956	20.9491	36.5395	22.5427
17	127.162	129.019	139.668	249.958	151.085	253.201	166.829	270.608	192.717	299.234	250.83	293.28	142.438	133.791	190.206	284.819	210.264	301.953	230.476	308.937	247.906	321.514	256.458	325.708		17	0.0493014	0.73513	2.54551	24.8747	4.82435	25.522	7.96687	28.9964	13.1341	34.7102	24.7335	33.5218	1.13473	0.0169661	10.6693	30.1623	14.6729	33.5822	18.7072	34.9762	22.1862	37.4866	23.8932
18	130.459	126.445	141.117	255.373	152.086	255.149	168.046	274.001	199.091	300.629	255.726	299.695	141.363	135.996	191.379	291.457	210.747	308.317	232.269	313.787	251.306	323.764	262.284	327.282		18	0.707385	0.221357	2.83473	25.9555	5.02415	25.9108	8.20978	29.6737	14.4064	34.9886	25.7108	34.8022	0.92016	0.457086	10.9034	31.4872	14.7693	34.8525	19.0651	35.9443	22.8649	37.9357	25.0561
19	128.011	127.664	139.563	259.243	152.392	256.635	173.6	277.603	207.683	305.494	254.581	302.763	141.468	134.868	196.142	297.939	214.483	310.203	234.016	315.894	258.723	328.635	269.846	329.79		19	0.218762	0.464671	2.52455	26.7279	5.08523	26.2074	9.31836	30.3926	16.1214	35.9597	25.4822	35.4146	0.941118	0.231936	11.8541	32.781	15.515	35.2289	19.4138	36.3649	24.3453	38.908	26.5655
20	127.023	126.859	141.178	259.449	154.82	259.917	174.669	282.279	207.732	303.196	264.809	306.645	140.029	135.793	196.589	303.652	218.24	316.332	243.175	318.422	262.811	331.719	274.415	330.607		20	0.0215569	0.303992	2.84691	26.7691	5.56986	26.8625	9.53174	31.3259	16.1311	35.501	27.5238	36.1894	0.653892	0.416567	11.9433	33.9214	16.2649	36.4523	21.2419	36.8695	25.1613	39.5236	27.4774
21	127.572	127.575	142.031	265.646	153.759	264.267	177.128	287.13	214.069	310.051	274.075	310.844	138.642	135.49	199.282	308.5	221.18	320.185	247.633	322.673	265.938	331.387	282.077	334.449		21	0.131138	0.446906	3.01717	28.006	5.35808	27.7307	10.0226	32.2942	17.396	36.8693	29.3733	37.0275	0.377046	0.356088	12.4808	34.889	16.8517	37.2214	22.1317	37.718	25.7854	39.4573	29.0068
22	129.431	126.898	142.877	266.718	156.429	267.728	180.68	287.453	214.382	311.066	270.327	313.984	142.223	134.538	201.163	310.28	224.813	320.07	249.645	320.914	273.164	331.965	290.56	335.69		22	0.502196	0.311776	3.18603	28.22	5.89102	28.4216	10.7315	32.3587	17.4585	37.0719	28.6251	37.6543	1.09182	0.166068	12.8563	35.2443	17.5768	37.1984	22.5333	37.3669	27.2277	39.5727	30.7
23	129.768	125.786	143.419	269.847	157.94	267.547	181.561	293.042	217.588	314.143	273.817	317.42	140.39	134.766	203.422	315.364	228.623	322.759	251.01	326.117	276.772	334.636	296.534	338.846		23	0.569461	0.0898204	3.29421	28.8445	6.19261	28.3854	10.9074	33.4743	18.0984	37.686	29.3218	38.3401	0.725948	0.211577	13.3072	36.2591	18.3373	37.7351	22.8058	38.4054	27.9479	40.1058	31.8924
24	129.919	125.336	143.075	270.459	160.263	270.396	183.678	294.448	222.509	318.422	282.048	316.281	141.592	133.706	208.739	317.238	232.324	325.167	259.505	332.801	282.573	337.053	303.234	334.593		24	0.599601	0	3.22555	28.9667	6.65629	28.9541	11.3299	33.7549	19.0806	38.5401	30.9647	38.1128	0.965868	0	14.3685	36.6331	19.076	38.2158	24.5014	39.7395	29.1058	40.5882	33.2297
25	130.152	126.956	144.203	272.919	160.365	271.094	183.95	294.95	222.828	318.299	289.125	320.804	141.194	135.033	211.043	320.4	237.669	329.2	262.312	328.859	290.239	338.524	311.528	339.975		25	0.646108	0.323353	3.4507	29.4577	6.67665	29.0934	11.3842	33.8551	19.1443	38.5156	32.3772	39.0156	0.886427	0.26487	14.8283	37.2643	20.1429	39.0208	25.0617	38.9527	30.6359	40.8818	34.8852
26	128.908	127.289	146.434	274.699	161.805	272.042	185.759	300.112	228.012	318.21	298.215	323.601	142.259	136.174	212.971	321.063	241.446	327.398	266.274	330.518	291.812	338.165	315.167	340.859		26	0.397804	0.38982	3.89601	29.813	6.96407	29.2826	11.7453	34.8854	20.179	38.4978	34.1916	39.5739	1.099	0.492615	15.2132	37.3966	20.8968	38.6611	25.8525	39.2838	30.9499	40.8102	35.6116
27	131.219	127.874	146.005	277.039	160.279	276.489	190.894	299.069	233.839	323.794	299.032	323.563	142.142	134.561	215.973	322.457	244.618	330.534	272.171	333.444	296.568	341.39	321.783	343.633		27	0.859082	0.506587	3.81038	30.28	6.65948	30.1703	12.7703	34.6772	21.3421	39.6124	34.3547	39.5663	1.07565	0.170659	15.8124	37.6749	21.5299	39.287	27.0295	39.8679	31.8992	41.4539	36.9321
28	130.054	126.156	146.013	281.279	162.397	276.269	193.012	299.228	236.703	322.878	304.818	327.22	141.987	135.85	221.561	326.24	249.674	329.949	274.778	333.197	303.153	342.275	329.361	344.764		28	0.626547	0.163673	3.81198	31.1263	7.08224	30.1263	13.193	34.709	21.9138	39.4295	35.5096	40.2962	1.04471	0.427944	16.9277	38.4299	22.5391	39.1703	27.5499	39.8186	33.2136	41.6305	38.4447
29	129.132	128.364	147.135	280.233	162.948	277.562	194.989	304.067	240.281	322.899	307.433	328.428	141.241	135.379	224.004	324.312	252.606	333.98	276.163	337.24	307.79	343.418	330.41	349.658		29	0.442515	0.604391	4.03593	30.9176	7.19222	30.3844	13.5876	35.6749	22.6279	39.4337	36.0315	40.5373	0.895808	0.333932	17.4154	38.0451	23.1244	39.9749	27.8263	40.6255	34.1391	41.8587	38.6541
30	130.918	126.452	147.548	281.251	165.017	279.608	196.736	307.691	242.11	327.509	315.247	334.506	142.777	135.729	226.802	328.277	255.608	336.061	284.279	335.852	314.357	344.682	337.331	346.791		30	0.799002	0.222754	4.11836	31.1208	7.60519	30.7928	13.9363	36.3982	22.993	40.3539	37.5912	41.7505	1.2024	0.403792	17.9739	38.8365	23.7236	40.3902	29.4463	40.3485	35.4499	42.111	40.0355
31	129.577	127.664	148.468	282.489	164.707	278.244	199.111	306.756	242.911	328.268	319.038	334.862	141.914	134.736	228.13	329.459	259.648	336.579	286.382	336.007	317.929	346.128	346.236	348.751		31	0.531337	0.464671	4.302	31.3679	7.54331	30.5206	14.4104	36.2116	23.1529	40.5054	38.3479	41.8216	1.03014	0.205589	18.2389	39.0725	24.5299	40.4936	29.8661	40.3794	36.1629	42.3996	41.813
32	130.142	126.331	149.279	284.31	166.191	282.486	201.002	307.843	251.165	330.198	328.919	335.612	143.233	136.841	231.551	333.113	263.284	335.06	292.098	337.786	322.878	348.498	349.424	351.649		32	0.644112	0.198603	4.46387	31.7313	7.83952	31.3673	14.7878	36.4285	24.8004	40.8906	40.3202	41.9713	1.29341	0.625749	18.9218	39.8018	25.2557	40.1904	31.007	40.7345	37.1507	42.8727	42.4493
33	130.067	127.487	151.601	287.868	167.194	282.839	204.91	308.24	253.454	331.383	332.127	337.586	143.132	135.952	236.383	332.871	272.243	337.582	296.839	339.063	326.35	351.105	357.642	350.143		33	0.629142	0.429341	4.92735	32.4415	8.03972	31.4377	15.5679	36.5078	25.2573	41.1271	40.9605	42.3653	1.27325	0.448303	19.8862	39.7535	27.0439	40.6938	31.9533	40.9894	37.8437	43.393	44.0896
34	128.496	126.769	152.941	291.179	170.759	285.729	206.754	309.074	256.241	331.534	338.634	336.752	143.413	135.72	239.307	336.184	275.152	339.279	299.995	340.613	332.423	347.383	363.812	349.684		34	0.315569	0.286028	5.19481	33.1024	8.7513	32.0146	15.9359	36.6743	25.8136	41.1573	42.2593	42.1988	1.32934	0.401996	20.4699	40.4148	27.6246	41.0325	32.5832	41.2988	39.0559	42.6501	45.3212
35	129.05	127.758	152.525	287.067	168.401	285.04	208.963	310.991	261.82	332.358	341.616	341.304	142.872	134.603	244.046	332.803	279.046	339.926	306.861	340.809	335.957	346.633	365.033	353.603		35	0.426148	0.483433	5.11178	32.2816	8.28064	31.877	16.3768	37.0569	26.9271	41.3218	42.8545	43.1074	1.22136	0.179042	21.4158	39.7399	28.4018	41.1617	33.9537	41.3379	39.7613	42.5004	45.5649
36	128.181	126.359	153.894	291.083	171.419	286.334	212.85	312.255	264.442	332.949	346.799	339.831	142.891	135.504	245.069	336.81	284.027	338.95	303.874	343.123	342.783	348.607	372.153	352.01		36	0.252695	0.204192	5.38503	33.0832	8.88303	32.1353	17.1527	37.3092	27.4505	41.4397	43.889	42.8134	1.22515	0.358882	21.62	40.5397	29.396	40.9669	33.3575	41.7998	41.1238	42.8944	46.986
37	128.187	127.167	155.079	291.9	173.197	284.017	213.148	312.234	265.51	333.879	349.701	337.721	142.247	135.039	248.76	336.817	289	342.526	312.163	344.408	345.054	351.117	379.502	355.131		37	0.253892	0.365469	5.62156	33.2463	9.23792	31.6729	17.2122	37.305	27.6637	41.6253	44.4683	42.3922	1.09661	0.266068	22.3567	40.5411	30.3886	41.6806	35.012	42.0563	41.577	43.3954	48.4529
38	128.625	126.698	153.565	292.003	172.054	288.166	213.434	312.831	266.678	334.995	353.505	342.017	144.866	135.317	252.158	337.534	284.434	340.874	312.856	344.773	347.185	350.712	380.98	353.291		38	0.341317	0.271856	5.31936	33.2669	9.00978	32.501	17.2693	37.4242	27.8968	41.8481	45.2275	43.2497	1.61936	0.321557	23.0349	40.6842	29.4772	41.3509	35.1503	42.1291	42.0024	43.3146	48.7479
39	127.095	126.356	153.108	295.707	171.71	287.938	215.499	312.089	268.432	334.908	361.943	343.016	144.524	136.502	253.627	337.514	288.353	345.064	313.397	346.265	353.592	347.207	381.912	355.355		39	0.0359281	0.203593	5.22814	34.0062	8.94112	32.4555	17.6814	37.276	28.2469	41.8307	46.9118	43.4491	1.5511	0.558084	23.3281	40.6802	30.2595	42.1872	35.2583	42.4269	43.2812	42.615	48.9339
40	126.644	127.525	155.506	294.961	175.9	289.51	215.402	317.44	273.991	337.036	364.671	344.909	143.582	136.6	256.009	337.298	290.935	343.348	319.42	346.744	358.351	351.216	386.444	359.502		40	-0.0540918	0.436926	5.70679	33.8573	9.77745	32.7693	17.6621	38.3441	29.3565	42.2555	47.4563	43.8269	1.36307	0.577645	23.8036	40.6371	30.7749	41.8447	36.4605	42.5226	44.2311	43.4152	49.8385
41	125.947	128.734	154.786	293.862	176.643	290.711	218.132	317.249	276.959	334.427	369.335	344.772	145.014	134.398	258.038	339.784	294.748	343.404	319.859	346.979	360.351	350.853	387.536	355.646		41	-0.193214	0.678244	5.56307	33.6379	9.92575	33.009	18.207	38.306	29.9489	41.7347	48.3872	43.7996	1.6489	0.138124	24.2086	41.1333	31.5359	41.8559	36.5481	42.5695	44.6303	43.3427	50.0565
42	128.175	126.78	155.196	295.262	177.276	289.98	218.379	312.767	277.229	337.044	379.598	348.322	142.008	136.456	259.123	340.123	296.974	346.59	325.228	349.723	357.259	352.389	390.161	356.002		42	0.251497	0.288224	5.64491	33.9174	10.0521	32.8631	18.2563	37.4114	30.0028	42.2571	50.4357	44.5082	1.0489	0.548902	24.4251	41.201	31.9802	42.4918	37.6198	43.1172	44.0132	43.6493	50.5804
43	127.047	127.54	154.974	298.098	177.911	289.964	217.952	315.203	278.409	337.892	379.029	345.113	142.724	134.801	260.259	337.416	298.017	345.314	321.231	348.474	362.967	349.134	392.777	358.015		43	0.0263473	0.43992	5.6006	34.4834	10.1788	32.8599	18.1711	37.8976	30.2383	42.4263	50.3222	43.8677	1.19182	0.218563	24.6519	40.6607	32.1884	42.2371	36.822	42.8679	45.1525	42.9996	51.1026
44	126.049	129.643	154.431	297.138	177.353	292.555	220.009	317.129	280.486	338.843	380.783	348.746	143.145	135.561	264.705	338.362	294.736	344.612	322.038	346.86	361.755	356.718	393.088	359.583		44	-0.172854	0.859681	5.49222	34.2918	10.0675	33.377	18.5816	38.282	30.6529	42.6162	50.6723	44.5928	1.27585	0.370259	25.5393	40.8495	31.5335	42.097	36.983	42.5457	44.9106	44.5134	51.1647
45	124.617	126.694	155.653	300.212	176.242	292.142	224.187	317.595	283	343.302	388.056	347.071	143.984	132.986	261.74	344.381	305.853	346.498	319.334	349.214	365.569	351.794	389.416	363.26		45	-0.458683	0.271058	5.73613	34.9054	9.84571	33.2946	19.4156	38.375	31.1547	43.5062	52.124	44.2585	1.44331	-0.143713	24.9475	42.0509	33.7525	42.4735	36.4433	43.0156	45.6719	43.5305	50.4317
46	124.615	128.156	155.356	299.925	179.675	294.79	225.269	318.877	283.93	342.806	394.196	345.201	144.406	135.525	270.214	340.386	303.718	347.012	321.218	349.66	369.653	353.25	388.036	360.542		46	-0.459082	0.562874	5.67685	34.8481	10.5309	33.8232	19.6315	38.6309	31.3403	43.4072	53.3495	43.8852	1.52754	0.363074	26.6389	41.2535	33.3263	42.576	36.8194	43.1046	46.487	43.8212	50.1563
47	123.438	129.466	155.768	299.27	180.69	291.324	224.695	317.599	285.858	342.722	393.368	345.646	142.401	136.16	269.516	341.064	300.768	348.124	323.112	349.346	361.833	354.393	392.87	363.476		47	-0.694012	0.824351	5.75908	34.7174	10.7335	33.1313	19.517	38.3758	31.7251	43.3904	53.1842	43.9741	1.12735	0.48982	26.4996	41.3888	32.7375	42.798	37.1974	43.0419	44.9261	44.0493	51.1212
48	124.76	129.192	158.962	300.876	178.488	292.652	229.24	317.31	288.226	342.427	396.252	348.451	142.834	136.886	267.381	343.316	299.775	346.675	318.591	349.997	363.271	358.23	397.838	364.931		48	-0.43014	0.769661	6.39661	35.0379	10.294	33.3964	20.4242	38.3182	32.1978	43.3315	53.7599	44.5339	1.21377	0.634731	26.0735	41.8383	32.5393	42.5088	36.295	43.1719	45.2132	44.8152	52.1128
49	125.991	126.561	159.35	299.389	180.346	295.893	228.639	320.623	288.228	339.733	402.166	351.28	141.643	136.629	270.483	342.843	300.053	347.583	325.859	350.663	371.505	356.525	395.503	361.126		49	-0.184431	0.244511	6.47405	34.7411	10.6649	34.0433	20.3042	38.9794	32.1982	42.7938	54.9403	45.0986	0.976048	0.583433	26.6926	41.7439	32.5948	42.69	37.7457	43.3048	46.8567	44.4749	51.6467
50	123.693	127.376	163.529	304.882	184.186	295.446	227.799	319.711	292.49	339.447	412.119	355.574	140.852	136.95	269.971	342.474	302.357	345.851	321.645	349.079	374.922	356.055	396.703	363.346		50	-0.643114	0.407186	7.30818	35.8375	11.4313	33.9541	20.1365	38.7974	33.0489	42.7367	56.9269	45.9557	0.818164	0.647505	26.5904	41.6703	33.0547	42.3443	36.9046	42.9886	47.5387	44.381	51.8862
51	123.438	127.174	157.458	304.466	183.3	295.285	230.674	320.307	290.237	342.077	405.186	357.588	141.939	135.804	273.784	341.765	309.59	345.417	328.285	350.936	369.311	355.75	402.991	362.184		51	-0.694012	0.366866	6.09641	35.7545	11.2545	33.922	20.7104	38.9164	32.5992	43.2617	55.5431	46.3577	1.03513	0.418762	27.3515	41.5287	34.4984	42.2577	38.2299	43.3593	46.4188	44.3202	53.1413
52	124.158	128.161	161.957	301.918	179.873	293.968	229.215	324.826	289.905	343.908	407.184	353.289	142.059	135.786	272.737	345.825	304.709	347.594	328.363	355.194	367.273	359.332	385.87	363.837		52	-0.550299	0.563872	6.99441	35.2459	10.5705	33.6591	20.4192	39.8184	32.5329	43.6271	55.9419	45.4996	1.05908	0.41517	27.1425	42.3391	33.5242	42.6922	38.2455	44.2092	46.012	45.0351	49.724
53	122.019	129.449	161.162	302.581	185.63	297.108	234.216	322.223	291.538	343.587	417.614	355.34	140.334	136.73	277.421	344.501	305.563	346.104	323.299	351.332	370.648	359.017	388.825	364.414		53	-0.977246	0.820958	6.83573	35.3782	11.7196	34.2858	21.4174	39.2988	32.8589	43.5631	58.0238	45.909	0.71477	0.603593	28.0774	42.0749	33.6946	42.3948	37.2347	43.4383	46.6856	44.9723	50.3138
54	125.418	128.714	158.856	305.574	186.669	296.652	235.083	322.67	298.828	344.748	418.81	358.06	140.725	137.535	276.064	347.679	305.867	347.532	321.334	350.395	379.348	359.591	408.374	363.827		54	-0.298802	0.674251	6.37545	35.9756	11.9269	34.1948	21.5904	39.388	34.314	43.7948	58.2625	46.4519	0.792814	0.764271	27.8066	42.7092	33.7553	42.6798	36.8425	43.2513	48.4222	45.0868	54.2158
55	125.942	129.358	163.393	304.246	186.09	296.791	238.073	320.905	293.079	347.414	418.405	364.755	139.157	136.59	278.198	345.433	309.494	347.343	337.99	350.812	385.977	358.912	380.243	365.672		55	-0.194212	0.802794	7.28104	35.7106	11.8114	34.2226	22.1872	39.0357	33.1665	44.3269	58.1816	47.7882	0.47984	0.575649	28.2325	42.2609	34.4792	42.6421	40.1671	43.3345	49.7453	44.9513	48.6008
56	122.346	128.48	160.393	303.24	181.449	296.862	238.248	322.892	290.001	347.252	425.454	353.778	136.967	137.068	271.013	347.448	307.772	349.001	336.334	354.206	378.202	361.46	396.145	368.446		56	-0.911976	0.627545	6.68224	35.5098	10.885	34.2367	22.2222	39.4323	32.5521	44.2946	59.5886	45.5972	0.0427146	0.671058	26.7984	42.6631	34.1355	42.9731	39.8365	44.012	48.1934	45.4599	51.7749
57	121.063	129.013	168.037	306.722	186.078	299.787	237.263	323.487	295.008	346.664	412.043	355.363	137.717	137.427	276.959	347.215	309.193	347.963	332.999	352.117	371.059	361.239	389.855	369.698		57	-1.16806	0.733932	8.20798	36.2048	11.809	34.8206	22.0255	39.5511	33.5515	44.1772	56.9118	45.9136	0.192415	0.742715	27.9852	42.6166	34.4192	42.7659	39.1709	43.595	46.7677	45.4158	50.5194
58	120.901	129.096	163.157	304.839	187.086	297.103	236.842	324.378	297.564	346.352	421.323	357.174	137.652	137.773	278.981	344.998	311.513	348.154	354.456	352.407	404.331	363.968	402.839	366.504		58	-1.2004	0.750499	7.23393	35.8289	12.0102	34.2848	21.9415	39.7289	34.0617	44.115	58.7641	46.275	0.179441	0.811776	28.3888	42.1741	34.8822	42.804	43.4537	43.6529	53.4088	45.9605	53.111
59	119.811	129.294	159.488	307.081	182.926	300.09	236.201	325.346	297.358	347.429	416.418	360.891	136.519	137.474	283.645	346.299	315.916	349.396	329.75	352.237	392.612	362.539	382.699	371.227		59	-1.41796	0.79002	6.5016	36.2764	11.1798	34.881	21.8136	39.9222	34.0206	44.3299	57.785	47.017	-0.0467066	0.752096	29.3198	42.4337	35.7611	43.0519	38.5224	43.619	51.0697	45.6752	49.091
60	122.319	129.747	161.548	306.481	185.37	299.482	242.149	328.159	292.781	350.632	409.877	355.671	134.696	138.178	274.781	346.742	326.713	347.078	338.521	350.164	353.802	360.55	377.296	368.865		60	-0.917365	0.880439	6.91277	36.1567	11.6677	34.7597	23.0008	40.4836	33.107	44.9693	56.4794	45.975	-0.410579	0.892615	27.5505	42.5222	37.9162	42.5892	40.2731	43.2052	43.3232	45.2782	48.0126
MIN in 30'	126.915	125.336											136.753	133.706
	F1	F2	F3	F4	F5	F6	F7	F8	F9	F10	F11	F12	F13	F14	F15	F16	F17	F18	F19	F20	F21	F22	F23	F24
0	140.194	150.752	138.721	179.148	138.325	184.397	142.985	194.937	149.403	206.561	159.466	208.821	152.162	161.662	148.099	168.429	152.814	176.642	150.189	179.609	143.311	190.259	147.821	216.259		0	1.9497	4.54032	1.65569	10.2082	1.57665	11.2559	2.50679	13.3597	3.78782	15.6798	5.79641	16.1309	1.65749	4.21557	0.846507	5.56627	1.78762	7.20559	1.26367	7.7978	-0.109182	9.92355	0.791018
1	131.35	142.987	134.068	209.017	138.226	219.483	143.413	229.64	148.297	248.386	165.19	247.942	150.349	156.486	147.815	192.679	153.243	201.193	151.213	211.389	150.36	223.309	156.274	241.125		1	0.184431	2.99042	0.726946	16.1701	1.55689	18.2591	2.59222	20.2864	3.56707	24.0281	6.93892	23.9395	1.29561	3.18244	0.78982	10.4066	1.87325	12.106	1.46806	14.1411	1.2978	16.5204	2.47824
2	132.111	141.265	132.691	225.271	138.152	235.991	141.467	240.919	150.841	262.025	173.676	262.411	147.577	153.876	149.19	210.664	154.167	222.979	153.804	228.312	155.793	242.116	168.237	255.361		2	0.336327	2.64671	0.452096	19.4144	1.54212	21.5541	2.20379	22.5377	4.07485	26.7505	8.63273	26.8275	0.742315	2.66148	1.06427	13.9964	2.05768	16.4545	1.98523	17.519	2.38224	20.2743	4.86607
3	133.226	139.471	133.163	235.303	138.065	245.779	143.272	250.768	153.426	265.399	181.59	270.943	147.712	154.385	149.768	222.717	160.134	233.928	158.992	240.139	166.318	253.164	178.167	263.235		3	0.558882	2.28862	0.546307	21.4168	1.52475	23.5078	2.56407	24.5036	4.59082	27.424	10.2124	28.5305	0.769261	2.76307	1.17964	16.4022	3.2487	18.6399	3.02076	19.8796	4.48303	22.4794	6.8481
4	132.184	136.931	134.065	240.4	138.749	253.851	143.382	256.758	155.481	273.299	190.688	274.834	149.806	152.087	154.521	229.089	161.943	241.648	164.392	246.915	171.695	262.157	190.293	275.224		4	0.350898	1.78164	0.726347	22.4341	1.66128	25.119	2.58603	25.6992	5.001	29.0008	12.0283	29.3072	1.18723	2.30439	2.12834	17.6741	3.60978	20.1808	4.0986	21.2321	5.55629	24.2745	9.26846
5	131.412	137.873	134.181	247.121	138.114	259.469	145.26	265.303	160.192	278.46	197.837	277.476	147.89	151.484	156.281	238.838	165.38	250.106	168.347	257.352	180.822	272.385	200.78	284.395		5	0.196806	1.96966	0.749501	23.7756	1.53453	26.2403	2.96088	27.4048	5.94132	30.0309	13.4553	29.8345	0.80479	2.18403	2.47964	19.62	4.29581	21.8691	4.88802	23.3154	7.37804	26.316	11.3617
6	132.997	139.723	135.387	255.15	139.202	264.116	147.043	271.091	162.642	280.885	204.646	283.891	147.088	147.958	162.06	244.927	170.904	255.538	173.793	265.826	189.467	277.255	209.082	290.774		6	0.513174	2.33892	0.99022	25.3782	1.7517	27.1679	3.31677	28.5601	6.43034	30.515	14.8144	31.115	0.644711	1.48024	3.63313	20.8353	5.3984	22.9533	5.97505	25.0068	9.10359	27.288	13.0188
7	131.259	134.405	134.622	259.007	138.501	268.78	148.278	275.75	166.751	284.457	211.062	285.858	146.658	147.531	162.043	254.488	175.902	264.642	178.849	269.766	196.331	286.104	219.593	303.233		7	0.166267	1.27745	0.837525	26.1481	1.61178	28.0988	3.56327	29.49	7.2505	31.2279	16.095	31.5076	0.558882	1.39501	3.62974	22.7437	6.39601	24.7705	6.98423	25.7932	10.4737	29.0543	15.1168
8	134.94	132.551	134.446	259.408	141.662	269.664	149.645	281.277	172.597	287	219.105	292.006	144.638	147.996	167.07	260.904	179.65	271.359	184.596	281.178	202.531	293.601	225.946	307.667		8	0.900998	0.907385	0.802395	26.2281	2.24271	28.2752	3.83613	30.5932	8.41737	31.7355	17.7004	32.7347	0.155689	1.48782	4.63313	24.0244	7.14411	26.1112	8.13134	28.0711	11.7112	30.5507	16.3848
9	133.732	133.121	134.418	262.434	140.766	280.005	152.245	287.871	174.767	292.023	226.248	299.773	146.562	148.599	171.3	269.95	183.509	279.555	190.188	286.301	210.539	300.297	233.522	314.354		9	0.65988	1.02116	0.796806	26.8321	2.06387	30.3393	4.35509	31.9094	8.8505	32.7381	19.1261	34.285	0.539721	1.60818	5.47745	25.8299	7.91437	27.7471	9.2475	29.0936	13.3096	31.8872	17.897
10	134.201	132.112	135.562	273.002	141.11	288.277	155.787	294.629	181.936	300.004	231.961	304.058	146.617	145.289	173.661	273.988	187.878	288.745	194.251	295.205	217.936	310.465	242.472	323.636		10	0.753493	0.81976	1.02515	28.9415	2.13253	31.9904	5.06208	33.2583	10.2814	34.3311	20.2665	35.1403	0.550699	0.947505	5.9487	26.6359	8.78643	29.5814	10.0585	30.8709	14.786	33.9168	19.6834
11	131.897	133.317	136.108	281.489	141.189	293.576	158.81	298.017	186.141	307.963	240.799	310.045	144.651	144.206	177.564	282.621	192.61	294.562	200.212	301.447	225.194	316.487	252.544	331.874		11	0.293613	1.06028	1.13413	30.6355	2.1483	33.0481	5.66547	33.9345	11.1208	35.9198	22.0305	36.3353	0.158283	0.731337	6.72774	28.3591	9.73094	30.7425	11.2483	32.1168	16.2347	35.1188	21.6938
12	133.366	131.061	139.31	290.475	144.176	296.612	160.56	305.586	188.415	308.766	246.034	311.327	145.286	143.274	182.462	293.607	195.442	304.84	204.285	311.151	228.088	326.739	261.818	339.522		12	0.586826	0.60998	1.77325	32.4291	2.74451	33.6541	6.01477	35.4453	11.5747	36.08	23.0754	36.5912	0.28503	0.545309	7.70539	30.5519	10.2962	32.794	12.0613	34.0537	16.8124	37.1651	23.5449
13	131.337	132.496	137.436	299.824	145.655	303.177	164.194	311.257	191.079	314.427	251.138	318.542	145.917	141.687	186.215	298.577	201.576	313.549	212.389	320.898	230.434	332.606	269.8	347.616		13	0.181836	0.896407	1.3992	34.2952	3.03972	34.9645	6.74012	36.5772	12.1064	37.21	24.0942	38.0313	0.410978	0.228543	8.45449	31.5439	11.5206	34.5323	13.6788	35.9992	17.2806	38.3361	25.1381
14	130.426	132.206	139.072	308.067	148.244	309.881	167.13	316.836	191.573	322.724	255.715	325.403	143.858	144.2	192.727	308.472	205.439	319.718	217.981	326.689	241.246	338.71	277.868	354.566		14	0	0.838523	1.72575	35.9405	3.55649	36.3026	7.32615	37.6908	12.205	38.8661	25.0078	39.4008	0	0.73014	9.75429	33.519	12.2916	35.7637	14.795	37.1551	19.4387	39.5545	26.7485
15	131.806	130.801	137.87	310.722	148.688	312.641	172.225	320.168	197.733	322.225	253.188	326.25	147.141	143.536	197.823	315.119	209.423	324.675	226.067	331.825	247.469	344.538	288.2	360.421		15	0.275449	0.558084	1.48583	36.4705	3.64511	36.8535	8.34311	38.3559	13.4345	38.7665	24.5034	39.5699	0.655289	0.597605	10.7715	34.8457	13.0868	36.7531	16.409	38.1802	20.6808	40.7178	28.8108
16	130.782	131.587	138.482	312.964	150.784	319.782	172.148	328.55	202.277	326.034	260.312	337.355	145.358	142.413	198.098	319.382	213.946	329.503	229.167	334.744	252.843	350.518	294.933	368.78		16	0.0710579	0.71497	1.60798	36.918	4.06347	38.2788	8.32774	40.0289	14.3415	39.5267	25.9253	41.7864	0.299401	0.373453	10.8263	35.6966	13.9896	37.7168	17.0277	38.7629	21.7535	41.9114	30.1547
17	132.926	131.98	139.152	319.977	151.8	321.201	172.551	331.542	207.306	332.618	268.91	340.574	145.225	143.921	201.776	326.057	219.139	336.203	232.153	342.958	255.762	357.754	306.42	372.349		17	0.499002	0.793413	1.74172	38.3178	4.26627	38.5621	8.40818	40.6261	15.3453	40.8409	27.6415	42.4289	0.272854	0.674451	11.5605	37.0289	15.0261	39.0541	17.6238	40.4024	22.3361	43.3557	32.4475
18	133.224	130.657	140.677	324.359	152.899	327.337	174.351	334.749	212.262	340.14	281.098	344.321	143.872	142.611	203.12	334.953	223.501	340.032	237.596	343.829	264.187	361.337	312.306	379.679		18	0.558483	0.529341	2.04611	39.1924	4.48563	39.7868	8.76747	41.2663	16.3345	42.3423	30.0743	43.1768	0.00279441	0.412974	11.8287	38.8046	15.8968	39.8184	18.7102	40.5762	24.0178	44.0709	33.6224
19	133.962	131.39	140.039	327.841	152.897	328.456	177.415	337.987	214.347	340.575	287.881	346.806	144.808	144.232	211.632	336.944	227.41	344.468	244.999	347.606	266.906	364.142	315.938	385.826		19	0.705788	0.675649	1.91876	39.8874	4.48523	40.0102	9.37904	41.9126	16.7507	42.4291	31.4281	43.6729	0.189621	0.736527	13.5277	39.202	16.677	40.7038	20.1878	41.3301	24.5605	44.6307	34.3473
20	132.762	130.35	140.301	330.186	156.457	332.374	180.002	343.236	217.979	350.889	293.652	352.267	145.167	143.001	212.826	339.963	228.219	349.363	251.406	354.807	272.538	367.072	329.365	389.046		20	0.466267	0.468064	1.97106	40.3555	5.19581	40.7922	9.89541	42.9603	17.4756	44.4878	32.58	44.7629	0.261277	0.490818	13.7661	39.8046	16.8385	41.6808	21.4667	42.7675	25.6846	45.2156	37.0273
21	131.827	130.904	141.173	334.82	156.396	336.042	181.493	346.233	224.351	349.73	301.651	357.176	145.152	141.827	217.596	348.454	233.127	353.135	256.504	358.497	276.552	370.757	335.457	394.778		21	0.279641	0.578643	2.14511	41.2804	5.18363	41.5244	10.193	43.5585	18.7475	44.2565	34.1766	45.7427	0.258283	0.256487	14.7182	41.4994	17.8182	42.4337	22.4842	43.504	26.4858	45.9511	38.2433
22	132.337	131.509	143.626	338.974	157.602	338.256	183.723	350.43	228.524	353.849	308.756	360.744	145.601	142.164	220.752	348.607	239.474	357.319	263.557	361.115	286.676	374.062	343.164	399.571		22	0.381437	0.699401	2.63473	42.1096	5.42435	41.9663	10.6381	44.3962	19.5804	45.0786	35.5948	46.4549	0.347904	0.323752	15.3481	41.5299	19.085	43.2689	23.892	44.0265	28.5066	46.6108	39.7816
23	133.707	130.891	143.301	341.148	158.84	342.116	185.455	352.343	230.952	357.194	316.333	364.681	145.728	142.666	227.561	353.155	242.158	360.369	266.752	368.144	293.86	379.975	349.576	403.628		23	0.65489	0.576048	2.56986	42.5435	5.67146	42.7367	10.9838	44.778	20.0651	45.7463	37.1072	47.2407	0.373253	0.423952	16.7072	42.4377	19.6208	43.8776	24.5297	45.4295	29.9405	47.791	41.0615
24	131.803	130.622	143.959	342.159	159.477	343.33	185.856	355.779	236.179	359.74	320.555	366.815	145.609	142.416	231.984	357.818	247.252	364.828	272.98	369.656	296.822	382.904	353.791	409.931		24	0.27485	0.522355	2.7012	42.7453	5.7986	42.979	11.0639	45.4639	21.1084	46.2545	37.9499	47.6667	0.349501	0.374052	17.59	43.3685	20.6375	44.7677	25.7729	45.7313	30.5317	48.3756	41.9028
25	130.563	129.579	145.479	345.509	161.744	347.357	188.368	359.295	241.871	362.867	327.013	371.765	145.045	141.714	236.677	363.477	251.606	364.484	274.987	372.253	300.914	384.868	362.413	409.161		25	0.0273453	0.314172	3.00459	43.414	6.2511	43.7828	11.5653	46.1657	22.2445	46.8786	39.2389	48.6547	0.236926	0.233932	18.5267	44.498	21.5066	44.699	26.1735	46.2497	31.3485	48.7677	43.6238
26	132.518	130.722	145.222	349.371	164.146	350.014	192.003	359.551	243.571	365.616	332.877	378.248	144.717	142.132	239.948	366.403	257.25	369.371	281.471	375.197	307.245	387.442	368.246	412.691		26	0.417565	0.542315	2.95329	44.1848	6.73054	44.3132	12.2908	46.2168	22.5838	47.4273	40.4094	49.9487	0.171457	0.317365	19.1796	45.082	22.6331	45.6745	27.4677	46.8373	32.6122	49.2814	44.788
27	132.956	130.06	147.661	352.1	163.298	352.529	194.577	366.527	247.118	367.555	341.45	377.413	145.103	141.907	242.34	365.511	261.747	376.343	285.658	376.212	313.448	392.476	374.559	419.303		27	0.50499	0.41018	3.44012	44.7295	6.56128	44.8152	12.8046	47.6092	23.2918	47.8144	42.1206	49.782	0.248503	0.272455	19.6571	44.904	23.5307	47.0661	28.3034	47.0399	33.8503	50.2862	46.0481
28	131.383	128.719	146.366	354.1	166.361	354.946	196.147	367.723	251.57	372.509	346.58	382.531	146.271	140.542	247.813	371.086	265.234	378.148	290.438	381.137	315.941	393.486	382.889	422.995		28	0.191018	0.142515	3.18164	45.1287	7.17265	45.2976	13.118	47.8479	24.1804	48.8032	43.1445	50.8036	0.481637	0	20.7495	46.0168	24.2267	47.4263	29.2575	48.023	34.3479	50.4878	47.7108
29	131.852	128.878	148.244	357.507	168.465	358.381	197.814	370.161	252.604	373.635	354.971	385.845	145.558	143.286	251.183	372.788	270.652	383.595	298.966	382.874	322.623	396.904	387.402	425.27		29	0.284631	0.174251	3.55649	45.8088	7.59261	45.9832	13.4507	48.3345	24.3868	49.0279	44.8194	51.4651	0.339321	0.547705	21.4222	46.3565	25.3082	48.5136	30.9597	48.3697	35.6816	51.1701	48.6116
30	132.058	128.005	148.032	359.669	170.187	358.595	202.805	373.405	258.557	376.076	360.882	388.962	146.696	141.709	255.175	379.168	275.752	379.808	301.831	388.527	325.268	399.515	389.681	430.405		30	0.325749	0	3.51417	46.2403	7.93633	46.0259	14.4469	48.982	25.575	49.5152	45.9992	52.0872	0.566467	0.232934	22.219	47.6299	26.3261	47.7577	31.5315	49.498	36.2096	51.6912	49.0665
31	129.299	130.758	149.631	360.577	171.846	363.054	203.737	374.13	263.889	379.817	367.794	392.737	148.04	140.617	258.714	383.186	281.822	385.318	306.371	389.839	327.333	400.751	397.814	430.963		31	-0.22495	0.549501	3.83333	46.4216	8.26747	46.916	14.6329	49.1267	26.6393	50.2619	47.3788	52.8407	0.834731	0.0149701	22.9253	48.4319	27.5377	48.8575	32.4377	49.7599	36.6218	51.9379	50.6898
32	130.951	127.388	150.197	362.869	173.204	366.197	204.235	378.476	270.227	380.902	371.553	396.14	146.603	141.473	262.94	383.101	283.223	387.035	312.538	392.149	333.479	405.066	399.028	434.421		32	0.10479	-0.123154	3.94631	46.879	8.53852	47.5433	14.7323	49.9942	27.9044	50.4784	48.1291	53.52	0.547904	0.185828	23.7689	48.415	27.8174	49.2002	33.6687	50.221	37.8485	52.7992	50.9321
33	130.179	129.916	152.383	363.248	173.404	368.563	206.15	381.101	273.112	385.84	377.815	395.734	147.212	140.867	267.355	384.99	288.799	389.329	319.326	391.546	334.673	407.571	401.78	436.634		33	-0.0493014	0.381437	4.38263	46.9547	8.57844	48.0156	15.1146	50.5182	28.4802	51.4641	49.379	53.4389	0.669461	0.0648703	24.6501	48.792	28.9303	49.6581	35.0236	50.1006	38.0868	53.2992	51.4814
34	129.651	129.671	154.026	370.649	175.65	368.829	208.912	383.021	273.405	389.305	382.373	398.833	145.571	141.143	270.43	390.221	293.055	389.206	320.502	395.984	340.817	413.811	404.026	439.848		34	-0.154691	0.332535	4.71058	48.4319	9.02675	48.0687	15.6659	50.9014	28.5387	52.1557	50.2888	54.0575	0.341916	0.11996	25.2639	49.8361	29.7798	49.6335	35.2583	50.9864	39.3132	54.5447	51.9297
35	129.324	131.096	153.916	369.924	176.787	368.873	209.434	384.087	277.674	389.137	384.224	403.154	146.158	141.655	276.18	390.161	300.272	396.734	327.206	401.659	341.763	414.915	409.829	441.918		35	-0.21996	0.616966	4.68862	48.2872	9.25369	48.0774	15.7701	51.1142	29.3908	52.1222	50.6583	54.92	0.459082	0.222156	26.4116	49.8242	31.2204	51.1361	36.5964	52.1192	39.502	54.7651	53.088
36	127.68	130.529	156.812	371.455	178.307	371.408	214.521	387.177	280.192	392.152	392.477	407.336	148.565	141.195	278.491	393.313	301.331	396.901	331.042	402.645	342.445	415.004	410.18	446.377		36	-0.548104	0.503792	5.26667	48.5928	9.55709	48.5834	16.7854	51.7309	29.8934	52.724	52.3056	55.7547	0.939521	0.130339	26.8729	50.4533	31.4317	51.1695	37.3621	52.316	39.6381	54.7828	53.1581
37	129.476	130.434	155.472	375.656	176.761	371.667	212.935	391.047	285.644	392.836	399.306	405.818	146.948	142.019	282.362	396.414	306.622	395.918	339.602	407	345.677	417.864	411.786	451.444		37	-0.189621	0.48483	4.9992	49.4313	9.2485	48.6351	16.4689	52.5034	30.9816	52.8605	53.6687	55.4517	0.616766	0.29481	27.6455	51.0723	32.4878	50.9733	39.0707	53.1852	40.2832	55.3537	53.4786
38	128.972	130.213	156.156	373.806	179.564	376.49	212.24	394.229	286.56	398.152	406.17	408.703	145.971	141.198	287.648	400.856	309.223	399.175	337.464	405.297	345.747	419.717	412.358	448.607		38	-0.29022	0.440719	5.13573	49.0621	9.80798	49.5978	16.3301	53.1385	31.1645	53.9216	55.0387	56.0275	0.421756	0.130938	28.7006	51.9589	33.007	51.6234	38.6439	52.8453	40.2972	55.7236	53.5928
39	128.739	128.599	156.543	380.022	182.074	380.167	218.732	393.809	289.297	397.414	408.776	408.702	147.566	142.468	288.626	399.965	315.919	404.667	340.852	410.032	352.729	423.598	413.05	452.565		39	-0.336727	0.118563	5.21297	50.3028	10.309	50.3317	17.6259	53.0547	31.7108	53.7743	55.5589	56.0273	0.74012	0.384431	28.8958	51.781	34.3435	52.7196	39.3202	53.7904	41.6908	56.4982	53.7309
40	128.763	130.609	156.377	380.089	181.895	383.015	219.629	394.769	291.409	398.704	409.656	411.938	148.702	142.514	292.887	403.114	318.921	402.927	344.824	409.454	354.586	427.086	415.335	456.191		40	-0.331936	0.51976	5.17984	50.3162	10.2733	50.9002	17.805	53.2463	32.1323	54.0317	55.7345	56.6733	0.966866	0.393613	29.7463	52.4096	34.9427	52.3723	40.113	53.675	42.0615	57.1944	54.187
41	128.029	130.487	156.414	382.082	185.713	381.836	221.519	399.389	294.941	404.141	417.219	415.087	148.151	142.42	296.67	406.233	317.508	409.539	350.132	411.996	357.185	426.656	412.815	461.083		41	-0.478443	0.495409	5.18723	50.714	11.0353	50.6649	18.1822	54.1685	32.8373	55.117	57.2441	57.3018	0.856886	0.37485	30.5014	53.0321	34.6607	53.692	41.1725	54.1824	42.5802	57.1086	53.684
42	128.583	132.151	161.77	381.155	186.56	382.488	223.891	398.406	301.154	407.696	420.853	415.967	146.949	140.255	301.978	402.792	323.908	409.964	350.727	413.568	357.989	430.121	414.297	466.843		42	-0.367864	0.827545	6.25629	50.5289	11.2044	50.795	18.6557	53.9723	34.0774	55.8265	57.9695	57.4774	0.616966	-0.0572854	31.5609	52.3453	35.9381	53.7768	41.2912	54.4962	42.7407	57.8002	53.9798
43	128.163	129.229	160.101	384.318	185.497	387.467	227.096	400.924	298.135	406.892	424.07	414.853	147.321	141.926	302.583	409.697	326.159	412.95	351.364	411.279	360.706	431.875	419.987	459.8		43	-0.451697	0.244311	5.92315	51.1603	10.9922	51.7888	19.2954	54.4749	33.4749	55.6661	58.6116	57.2551	0.691218	0.276248	31.6816	53.7236	36.3874	54.3729	41.4184	54.0393	43.283	58.1503	55.1156
44	124.648	130.056	159.471	387.933	189.146	390.862	227.414	401.604	303.249	406.535	425.776	418.257	147.615	140.809	308.9	408.731	326.868	414.306	352.982	416.561	361.774	433.104	413.249	463.264		44	-1.15329	0.409381	5.79741	51.8818	11.7206	52.4665	19.3589	54.6106	34.4956	55.5948	58.9521	57.9345	0.7499	0.0532934	32.9425	53.5307	36.5289	54.6435	41.7413	55.0936	43.4962	58.3956	53.7707
45	123.094	130.155	159.503	388.466	190.934	387.327	231.359	403.337	307.251	410.645	428.693	421.987	145.298	142.037	307.17	409.739	331.426	414.455	356.734	417.536	356.117	439.559	418.895	469.896		45	-1.46347	0.429142	5.80379	51.9882	12.0774	51.7609	20.1463	54.9565	35.2944	56.4152	59.5343	58.679	0.287425	0.298403	32.5972	53.7319	37.4387	54.6733	42.4902	55.2882	42.3671	59.684	54.8976
46	126.788	131.679	161.066	388.237	193.83	389.344	233.77	405.586	308.09	413.695	432.121	424.5	148.428	142.239	309.683	407.756	335.068	415.538	360.213	422.309	360.408	438.739	411.73	472.649		46	-0.726148	0.733333	6.11577	51.9425	12.6555	52.1635	20.6275	55.4054	35.4619	57.024	60.2186	59.1806	0.912176	0.338723	33.0988	53.3361	38.1657	54.8894	43.1846	56.2409	43.2236	59.5204	53.4675
47	127.58	129.535	161.001	388.544	190.06	392.736	232.871	409.418	310.927	412.612	436.422	426.124	146.703	141.39	311.142	415.545	334.777	418.228	359.82	422.21	362.226	439.097	417.033	468.977		47	-0.568064	0.305389	6.10279	52.0038	11.903	52.8405	20.4481	56.1703	36.0281	56.8078	61.077	59.5048	0.567864	0.169261	33.39	54.8908	38.1076	55.4263	43.1062	56.2212	43.5864	59.5918	54.5259
48	126.296	131.41	160.905	390.837	196.011	391.11	234.644	405.671	311.187	416.209	436.729	431.088	145.87	142.823	315.36	416.225	332.806	419.777	361.689	423.777	365.101	441.587	415.459	469.633		48	-0.824351	0.679641	6.08363	52.4615	13.0908	52.516	20.802	55.4224	36.08	57.5257	61.1383	60.4956	0.401597	0.455289	34.2319	55.0265	37.7142	55.7355	43.4792	56.5339	44.1603	60.0888	54.2118
49	125.552	130.156	163.371	391.772	196.687	394.533	238.304	410.09	313.202	415.471	429.923	432.976	146.278	142.246	312.621	418.87	336.485	420.991	359.591	426.712	365.688	442.932	420.864	477.277		49	-0.972854	0.429341	6.57585	52.6481	13.2257	53.1992	21.5325	56.3044	36.4822	57.3784	59.7798	60.8725	0.483034	0.34012	33.6852	55.5545	38.4485	55.9778	43.0605	57.1198	44.2774	60.3573	55.2906
50	123.64	131.313	166.17	396.364	196.792	394.165	238.17	410.159	317.238	418.446	432.632	430.269	147.262	141.984	315.29	417.861	339.185	422.74	359.914	428.218	365.92	444.177	414.029	482.136		50	-1.35449	0.660279	7.13453	53.5647	13.2467	53.1257	21.5058	56.3182	37.2878	57.9723	60.3206	60.3321	0.679441	0.287824	34.218	55.3531	38.9874	56.3269	43.125	57.4204	44.3238	60.6058	53.9263
51	124.739	129.567	166.027	395.303	195.912	394.858	240.914	415.681	318.765	418.83	434.43	429.911	144.55	141.43	319.756	421.243	339.766	422.882	355.544	429.922	366.095	446.183	413.423	480.132		51	-1.13513	0.311776	7.10599	53.3529	13.0711	53.2641	22.0535	57.4204	37.5926	58.0489	60.6794	60.2607	0.138124	0.177246	35.1094	56.0281	39.1034	56.3553	42.2527	57.7605	44.3587	61.0062	53.8054
52	126.068	129.95	166.686	398.089	195.036	394.273	238.065	412.281	319.419	422.459	438.921	432.994	144.569	142.043	317.134	423.391	336.953	424.654	359.198	432.409	376.095	448.382	413.26	475.055		52	-0.86986	0.388224	7.23752	53.909	12.8962	53.1473	21.4848	56.7417	37.7232	58.7733	61.5758	60.876	0.141916	0.299601	34.586	56.4569	38.5419	56.709	42.982	58.2569	46.3547	61.4451	53.7729
53	125.994	131.924	172.747	399.407	202.203	394.735	244.51	414.548	320.039	424.522	437.533	433.599	142.991	141.515	324.49	425.076	349.636	425.572	364.538	432.304	366.917	445.044	416.773	482.885		53	-0.884631	0.782236	8.44731	54.1721	14.3267	53.2395	22.7713	57.1942	37.8469	59.185	61.2988	60.9968	-0.173054	0.194212	36.0543	56.7932	41.0735	56.8922	44.0479	58.2359	44.5228	60.7788	54.4741
54	121.364	132.464	168.968	400.451	198.293	396.878	244.714	416.72	319.608	421.862	432.103	435.053	141.768	143.502	330.948	422.473	346.57	427.216	371.289	434.074	357.042	448.332	402.804	479.849		54	-1.80878	0.89002	7.69301	54.3804	13.5463	53.6673	22.812	57.6277	37.7609	58.6541	60.215	61.287	-0.417166	0.590818	37.3433	56.2737	40.4615	57.2204	45.3954	58.5892	42.5517	61.4351	51.6858
55	126.243	132.542	167.532	401.146	198.83	395.649	243.732	418.966	321.429	424.439	427.528	437.623	140.189	142.681	323.389	426.432	349.844	428.777	357.811	433.699	365.708	452.434	403.784	479.098		55	-0.83493	0.905589	7.40639	54.5192	13.6535	53.422	22.616	58.076	38.1244	59.1685	59.3018	61.8	-0.732335	0.426946	35.8345	57.0639	41.115	57.5319	42.7052	58.5144	44.2814	62.2539	51.8814
56	126.205	131.122	173	406.344	196.259	402.181	243.264	420.023	326.174	427.37	431.29	438.752	141.539	144.115	316.202	424.888	349.558	431.309	372.341	437.663	370.884	451.302	409.486	482.961		56	-0.842515	0.622156	8.4978	55.5567	13.1403	54.7257	22.5226	58.287	39.0715	59.7535	60.0527	62.0253	-0.462874	0.713174	34.4	56.7557	41.0579	58.0373	45.6054	59.3056	45.3146	62.0279	53.0196
57	125.493	131.257	171.76	404.78	209.291	402.638	246.335	420.198	323.777	429.623	431.177	438.646	142.712	141.948	322.545	427.682	345.966	431.854	362.218	437.007	371.357	456.527	402.001	476.525		57	-0.984631	0.649102	8.2503	55.2445	15.7415	54.817	23.1355	58.322	38.593	60.2032	60.0301	62.0042	-0.228743	0.280639	35.6661	57.3134	40.3409	58.1461	43.5848	59.1747	45.409	63.0709	51.5255
58	125.962	133.19	174.436	403.028	203.242	401.34	242.827	422.541	330.097	430.31	433.627	436.464	142.202	140.7	336.303	428.224	343.159	435.628	359.029	439.223	362.185	453.103	400.943	480.787		58	-0.891018	1.03493	8.78443	54.8948	14.5341	54.5579	22.4353	58.7896	39.8545	60.3403	60.5192	61.5687	-0.330539	0.0315369	38.4122	57.4216	39.7806	58.8994	42.9483	59.617	43.5782	62.3874	51.3144
59	124.608	130.992	171.124	403.458	209.505	402.246	241.742	419.861	332.711	430.381	432.103	439.955	139.294	140.96	338.265	426.902	340.288	433.093	359.899	440.699	358.853	457.785	402.467	480.14		59	-1.16128	0.596208	8.12335	54.9806	15.7842	54.7387	22.2188	58.2547	40.3762	60.3545	60.215	62.2655	-0.910978	0.0834331	38.8038	57.1577	39.2076	58.3934	43.122	59.9116	42.9132	63.322	51.6186
60	117.51	130.899	174.704	405.624	217.297	406.275	247.052	424.049	327.54	432.045	427.536	440.429	138.844	142.122	325.417	431.76	358.377	435.468	369.623	441.928	359.743	456.499	399.253	477.581		60	-2.57804	0.577645	8.83792	55.413	17.3395	55.5429	23.2786	59.0906	39.3441	60.6866	59.3034	62.3601	-1.0008	0.315369	36.2393	58.1273	42.8182	58.8675	45.0629	60.1569	43.0908	63.0653	50.977
MIN in 30'	130.426	128.005											143.858	140.542
[truncated: 52 more columns]

## Sheet: Figure C and D
																																		delta max	599	599	599	599	599	599	599	599	599	599	599	599	599	599	599
																																		lowest val in 30' rep1	126.277	125.98	126.277	125.98	126.277	125.98	126.277	125.98	126.277	125.98	126.277	125.98	126.277	125.98	126.277
	from AO 19-19C																from AO19-19F																	lowest val in 30' rep2	128.037	127.98	128.037	127.98	128.037	127.98	128.037	127.98	128.037	127.98	128.037	127.98	128.037	127.98	128.037
	R+Qb with curve of Qa and constant (4uM) Qc																R+Qb with curve of Qc and constant (4uM) Qa																	lowest val in 30' rep3	125.176	127.913	125.176	127.913	125.176	127.913	125.176	127.913	125.176	127.913	125.176	127.913	125.176	127.913	125.176
	C1	C2	C3	C4	C5	C6	C7	C8	C9	C10	C11	C12	C13	C14	C15	C16	A1	A2	A3	A4	A5	A6	A7	A8	A9	A10	A11	A12	A13	A14	A15	A16			C1	C2	C3	C4	C5	C6	C7	C8	C9	C10	C11	C12	C13	C14	C15
0	142.106	140.899	143.748	145.575	147.801	146.32	143.693	156.984	150.369	153.118	148.742	154.103	155.331	149.387	148.615	147.702	142.553	151.394	154.205	163.675	149.756	156.177	153.6	168.063	153.771	162.702	154.92	171.188	154.905	165.274	150.345	158.25		0	2.64257	2.49065	2.91669	3.27129	3.59332	3.39566	2.90751	5.17596	4.02204	4.53055	3.75042	4.69499	4.85042	3.90768	3.72922
1	132.392	132.543	138.831	143.595	139.918	145.743	141.513	158.147	143.448	152.697	147.735	152.586	149.633	152.353	149.174	150.178	134.687	143.167	147.351	155.261	145.088	153.341	151.241	163.294	152.044	160.212	152.417	153.92	154.401	163.322	148.828	159.794		1	1.02087	1.09566	2.09583	2.94073	2.2773	3.29933	2.54357	5.37012	2.86661	4.46027	3.5823	4.44174	3.89917	4.40284	3.82254
2	132.585	133.138	136.004	148.689	138.863	148.842	140.032	161.057	142.41	154.742	144.821	156.689	151.008	156.73	152.29	156.918	134.35	140.796	145.853	153.028	145.972	154.301	151.61	163.379	149.991	161.982	152.171	157.173	153.427	168.909	152.453	161.065		2	1.05309	1.19499	1.62387	3.79115	2.10117	3.81669	2.29633	5.85593	2.69332	4.80167	3.09583	5.12671	4.12871	5.13356	4.34274
3	131.636	134.637	136.684	150.6	136.732	151.1	140.678	165.172	146.424	158.795	147.613	160.225	153.573	161.583	156.36	162.194	132.173	138.807	142.115	153.78	145.894	155.616	148.531	164.759	149.716	165.883	152.587	163.039	155.23	172.926	156.467	170.978		3	0.894658	1.44524	1.7374	4.11018	1.74541	4.19366	2.40417	6.5429	3.36344	5.4783	3.56194	5.71703	4.55693	5.94374	5.0222
4	130.678	131.736	137.187	158.019	136.885	159.207	143.045	168.443	144.571	163.513	148.541	166.211	154.043	168.922	159.477	169.357	131.955	137.307	144.855	155.334	144.153	158.139	148.619	164.69	148.341	167.896	154.295	167.047	159.102	175.901	161.727	175.753		4	0.734725	0.960935	1.82137	5.34875	1.77095	5.54708	2.79933	7.08898	3.05409	6.26594	3.71686	6.71636	4.63539	7.16895	5.54257
5	128.639	131.038	135.921	163.595	137.494	162.311	142.609	174.547	147.244	171.691	151.126	171.791	158.656	176.435	166.419	177.352	132.507	134.918	143.56	161.004	144.73	162.69	150.875	166.004	149.869	168.275	155.59	173.072	161.252	180.129	168.311	181.589		5	0.394324	0.844407	1.61002	6.27963	1.87262	6.06528	2.72654	8.10801	3.50033	7.63122	4.14841	7.64791	5.40551	8.42321	6.7015
6	129.73	130.64	136.359	171.697	139.554	170.899	144.532	183.035	149.913	177.748	155.547	179.209	164.601	183.005	170.413	183.037	130.007	135.745	141.539	161.88	144.04	166.429	149.639	171.697	152.873	169.52	158.144	179.544	166.179	184.251	171	188.211		6	0.576461	0.777963	1.68314	7.63222	2.21653	7.499	3.04758	9.52504	3.94591	8.6424	4.88648	8.88631	6.398	9.52003	7.36828
7	132.639	129.807	137.018	176.894	140.352	176.245	146.534	188.741	154.891	188.194	160.781	186.407	168.358	191.738	178.144	192.834	130.396	135.741	142.831	165.051	144.331	169.847	150.296	175.899	151.719	178.126	160.167	186.08	167.097	189.498	174.983	198.127		7	1.0621	0.638898	1.79316	8.49983	2.34975	8.39149	3.3818	10.4776	4.77696	10.3863	5.76027	10.088	7.02521	10.978	8.65893
8	130.496	130.571	138.431	183.323	142.238	184.443	150.201	194.856	156.173	194.315	163.563	194.659	175.275	197.392	185.499	203.429	130.188	134.791	141.75	168.602	145.592	176.209	148.63	184.658	153.998	183.931	159.858	194.162	170.729	197.351	176.546	203.232		8	0.704341	0.766444	2.02905	9.57312	2.66461	9.7601	3.99399	11.4985	4.99098	11.4082	6.22471	11.4656	8.17997	11.9219	9.88681
9	128.268	128.414	140.412	193.033	143.791	188.881	151.446	204.158	160.846	203.696	170.106	200.965	182.009	206.038	192.657	212.38	131.516	133.643	142.075	174.091	144.237	180.713	152.542	188.938	157.777	190.844	164.258	200.829	174.669	203.484	183.494	211.232		9	0.332387	0.406344	2.35977	11.1942	2.92387	10.501	4.20184	13.0514	5.77112	12.9743	7.31703	12.5184	9.30417	13.3653	11.0818
10	129.416	130.532	140.831	198.517	146.983	197.14	154.057	209.478	163.985	211.34	174.922	208.246	187.458	214.392	198.534	217.083	130	135.885	141.389	177.007	144.049	187.095	151.637	195.025	158.585	195.68	165.531	207.458	178.624	210.5	187.61	221.577		10	0.52404	0.759933	2.42972	12.1097	3.45676	11.8798	4.63773	13.9396	6.29516	14.2504	8.12104	13.7339	10.2139	14.7599	12.0629
11	128.809	128.308	141.693	208.086	149.46	204.35	156.131	218.611	169.386	219.368	179.176	216.856	194.835	223.342	202.758	225.621	133.53	134.661	143.396	182.68	145.779	193.469	152.839	201.137	159.579	201.465	167.746	216.646	183.405	216.447	194.851	227.015		11	0.422705	0.388648	2.57362	13.7072	3.87028	13.0835	4.98397	15.4643	7.19683	15.5907	8.83122	15.1713	11.4454	16.2541	12.7681
12	128.209	128.139	145.173	213.697	150.492	215.511	159.63	224.507	170.339	224.992	183.26	224.102	197.142	226.967	210.349	231.638	130.17	136.695	141.011	190.144	145.338	197.131	154.835	207.374	160.71	208.624	173.077	220.832	185.244	222.365	196.775	233.792		12	0.322538	0.360434	3.15459	14.6439	4.04257	14.9467	5.56811	16.4486	7.35593	16.5295	9.51302	16.381	11.8306	16.8593	14.0354
13	127.264	126.925	144.441	221.432	152.527	219.7	163.535	233.27	175.105	233.457	188.735	229.74	204.578	237.608	219.288	237.547	128.216	135.591	143.523	193.769	145.706	203.449	156.283	215.339	163.458	214.248	174.983	227.165	192.219	230.649	202.499	239.888		13	0.164775	0.157763	3.03239	15.9352	4.3823	15.6461	6.22003	17.9115	8.15159	17.9427	10.427	17.3222	13.072	18.6357	15.5277
14	126.277	128.629	145.383	227.765	156.906	222.684	164.067	242.286	176.895	244.634	195.277	234.965	211.259	245.641	224.603	248.007	127.695	131.043	144.19	199.597	150.181	206.626	158.363	219.37	166.545	220.103	179.323	235.252	197.596	236.636	208.195	250.422		14	0	0.442237	3.18965	16.9925	5.11336	16.1442	6.30885	19.4167	8.45042	19.8087	11.5192	18.1945	14.1873	19.9768	16.415
15	129.664	128.177	146.577	236.813	155.943	231.616	166.097	248.152	180.5	250.525	198.088	244.91	212.84	251.695	228.89	253.662	126.626	130.993	143.685	204.636	149.454	212.717	159.095	227.948	168.968	224.379	182.752	245.052	203.526	241.642	214.943	251.512		15	0.565442	0.366778	3.38898	18.503	4.95259	17.6354	6.64775	20.396	9.05225	20.7922	11.9885	19.8548	14.4513	20.9875	17.1307
16	128.138	125.98	150.664	242.826	158.708	237.936	167.755	255.434	181.221	256.744	202.652	248.343	217.448	259.554	234.679	263.103	126.105	132.168	142.98	209.438	147.741	220.805	159.738	231.833	172.813	232.651	186.722	249.023	206.783	250.662	219.194	261.523		16	0.310684	0	4.07129	19.5068	5.41419	18.6905	6.92454	21.6117	9.17262	21.8304	12.7504	20.4279	15.2205	22.2995	18.0972
17	128.599	127.151	151.773	251.905	159.615	246.438	171.665	260.208	187.188	264.896	204.155	254.562	221.988	267.508	243.028	269.346	126.434	129.956	145.499	215.6	148.414	225.983	160.496	238.685	173.297	236.442	191.118	256.871	208.816	258.171	225.975	275.385		17	0.387646	0.195492	4.25643	21.0225	5.56561	20.1098	7.5773	22.4087	10.1688	23.1913	13.0013	21.4661	15.9785	23.6274	19.491
18	128.551	127.382	149.532	256.457	161.92	250.488	170.225	268.451	189.586	271.376	208.083	266.143	227.18	273.492	236.408	273.019	124.641	129.934	143.381	219.644	146.793	231.67	160.182	247.541	175.162	246.129	190.81	262.255	212.28	268.315	229.739	280.233		18	0.379633	0.234057	3.8823	21.7825	5.95042	20.786	7.33689	23.7848	10.5691	24.2731	13.6571	23.3995	16.8452	24.6264	18.3858
19	127.522	127.729	153.54	263.769	162.829	260.712	175.504	276.352	192.22	277.78	209.925	271.799	231.39	280.919	252.775	280.357	125.769	129.923	143.48	227.087	147.455	240.698	162.683	255.151	173.809	252.748	194.869	266.993	216.876	272.517	233.25	289.065		19	0.207846	0.291987	4.55142	23.0032	6.10217	22.4928	8.2182	25.1038	11.0088	25.3422	13.9646	24.3437	17.5481	25.8663	21.1182
20	128.446	127.326	151.759	269.086	164.687	264.534	177.134	283.958	194.217	286.001	217.295	276.165	233.119	285.843	257.143	288.343	126.566	128.875	142.544	233.404	150.096	246.332	163.711	262.483	176.127	257.08	197.09	275.756	229.612	278.257	232.147	299.983		20	0.362104	0.224708	4.25409	23.8908	6.41235	23.1309	8.49032	26.3736	11.3422	26.7147	15.195	25.0726	17.8367	26.6883	21.8474
21	129.83	126.135	153.129	274.128	165.781	269.841	180.471	292.289	199.966	297.182	223.915	283.162	235.238	294.739	254.753	293.802	127.768	129.019	143.435	236.883	148.734	252.737	162.519	268.886	175.881	264.744	199.096	284.243	224.567	284.844	235.427	302.521		21	0.593155	0.0258765	4.4828	24.7326	6.59499	24.0169	9.04741	27.7644	12.302	28.5813	16.3002	26.2407	18.1905	28.1735	21.4484
22	129.147	126.833	153.072	282.032	167.768	276.076	181.666	300.645	201.861	300.147	224.748	290.25	240.428	300.155	260.584	300.612	125.606	130.092	143.489	243.974	151.921	258.351	165.817	273.288	179.788	270.724	200.141	286.817	229.841	288.614	244.267	307.406		22	0.479132	0.142404	4.47329	26.0521	6.92671	25.0578	9.24691	29.1594	12.6184	29.0763	16.4392	27.424	19.0569	29.0776	22.4219
23	129.051	126.336	155.328	287.09	170.892	280.406	182.093	307.138	206.056	307.108	227.1	295.404	247.952	305.73	262.062	307.629	127.13	129.1	144.551	249.485	150.646	262.837	165.16	282.619	183.265	275.736	200.117	293.706	228.826	296.854	255.153	316.608		23	0.463105	0.0594324	4.84992	26.8965	7.44825	25.7806	9.3182	30.2434	13.3187	30.2384	16.8319	28.2845	20.313	30.0083	22.6686
24	130.608	126.427	155.127	292.475	170.095	287.345	184.431	310.184	209.929	311.456	229.437	301.469	255.13	313.193	267.433	315.636	130.52	130.46	143.898	252.56	150.924	269.345	167.246	284.686	181.601	280.24	202.127	299.411	233.13	303.323	256.389	321.333		24	0.723038	0.0746244	4.81636	27.7955	7.31519	26.9391	9.70851	30.7519	13.9653	30.9643	17.222	29.297	21.5114	31.2543	23.5653
25	128.74	126.339	156.926	298.61	171.572	292.936	185.151	320.646	209.193	322.26	230.577	307.297	255.231	315.603	271.177	317.584	128.025	129.458	143.729	258.395	151.108	274.24	168.278	292.006	184.209	285.396	207.835	303.584	234.899	306.185	263.227	327.291		25	0.411185	0.0599332	5.11669	28.8197	7.56177	27.8725	9.82871	32.4985	13.8424	32.7679	17.4124	30.2699	21.5282	31.6566	24.1903
26	131.154	126.748	159.278	305.086	173.272	298.915	187.852	323.007	213.504	327.597	237.435	312.276	259.967	323.287	271.29	326.336	128.989	129.999	143.615	264.219	151.922	278.849	168.345	294.377	185.067	292.102	212.479	309.222	236.02	313.164	268.724	334.366		26	0.81419	0.128214	5.50935	29.9008	7.84558	28.8706	10.2796	32.8927	14.5621	33.6589	18.5573	31.1012	22.3189	32.9394	24.2092
27	132.004	127.98	159.033	309.685	174.224	305.289	186.145	331.192	213.251	332.883	237.577	317.564	262.433	328.202	276.553	327.436	127.707	128.963	144.329	266.372	153.399	281.593	170.328	299.509	186.503	297.954	210.816	314.268	243.091	318.807	270.202	342.177		27	0.956093	0.33389	5.46845	30.6686	8.00451	29.9347	9.99466	34.2591	14.5199	34.5414	18.581	31.984	22.7306	33.7599	25.0878
28	130.674	127.986	158.731	314.223	174.705	310.146	190.157	337.678	214.817	337.144	242.061	324.996	265.189	336.347	280.36	331.657	128.742	129.671	144.419	272.298	154.135	288.703	170.768	301.908	186.151	301.055	212.451	319.523	244.969	323.042	274.106	350.527		28	0.734057	0.334891	5.41803	31.4262	8.08481	30.7456	10.6644	35.3419	14.7813	35.2528	19.3295	33.2247	23.1907	35.1197	25.7234
29	131.307	127.103	160.52	318.141	176.314	314.597	191.585	342.917	216.137	340.851	243.686	328.819	271.324	337.483	281.863	337.071	129.393	130.861	145.49	276.252	153.205	290.809	170.036	307.482	185.99	304.574	217.522	323.284	246.285	326.963	277.414	349.514		29	0.839733	0.187479	5.71669	32.0803	8.35342	31.4886	10.9028	36.2165	15.0017	35.8716	19.6008	33.8629	24.2149	35.3093	25.9743
30	133.074	127.361	160.415	322.894	175.339	319.873	193.75	347.743	219.192	349.421	246.101	333.983	273.741	342.699	287.348	345.025	128.644	129.361	147.397	283.455	154.958	295.962	169.59	313.372	188.451	309.774	217.54	327.528	245.914	330.421	281.211	359.894		30	1.13472	0.230551	5.69917	32.8738	8.19065	32.3694	11.2643	37.0222	15.5117	37.3023	20.004	34.725	24.6184	36.1801	26.89
31	133.325	128.554	161.402	324.408	178.075	323.251	193.613	355.482	219.778	352.774	248.887	339.094	276.999	349.853	288.689	350.524	127.344	128.595	144.953	285.356	154.276	298.475	171.775	316.746	189.492	311.312	219.822	334.381	250.897	339.175	285.007	362.173		31	1.17663	0.429716	5.86394	33.1265	8.64741	32.9334	11.2414	38.3142	15.6095	37.8621	20.4691	35.5783	25.1623	37.3745	27.1139
32	130.365	129.059	161.02	332.843	178.598	328.612	194.333	358.998	222.894	357.058	248.579	344.203	277.471	351.641	286.29	353.756	131.245	130.039	146.717	289.449	156.986	302.685	172.057	321.918	193.115	315.176	218.896	337.969	252.076	341.042	287.586	368.535		32	0.682471	0.514023	5.80017	34.5347	8.73472	33.8284	11.3616	38.9012	16.1297	38.5773	20.4177	36.4312	25.2411	37.673	26.7134
33	132.695	127.282	164.236	337.955	181.361	337.457	194.391	364.072	223.064	362.529	252.992	348.006	283.638	355.849	291.977	356.118	128.833	129.587	146.519	291.545	156.589	304.324	172.805	323.462	192.951	322.436	223.365	341.101	254.824	343.158	292.166	371.743		33	1.07145	0.217362	6.33706	35.3881	9.19599	35.305	11.3713	39.7482	16.1581	39.4907	21.1544	37.0661	26.2706	38.3755	27.6628
34	131.136	128.47	163.773	339.432	181.202	337.946	197.029	366.534	223.121	365.879	251.711	353.18	280.805	361.927	294.149	361.343	130.794	128.615	148.428	293.765	156.385	309.386	173.433	330.589	194.601	323.281	225.395	343.957	257.665	351.456	295.076	376.724		34	0.811185	0.415693	6.25977	35.6347	9.16945	35.3866	11.8117	40.1593	16.1676	40.0499	20.9406	37.9299	25.7977	39.3902	28.0254
35	133.883	128.879	164.972	343.398	182.858	341.914	198.013	370.384	224.71	372.332	254.711	358.604	283.19	366.721	298.173	368.236	130.087	129.578	147.622	297.935	157.496	313.647	172.944	331.334	197.344	327.661	225.003	348.971	259.34	355.253	298.756	380.326		35	1.26978	0.483973	6.45993	36.2968	9.44591	36.0491	11.976	40.802	16.4329	41.1272	21.4414	38.8354	26.1958	40.1905	28.6972
36	133.978	127.462	164.761	348.235	182.036	346.826	198.462	372.862	225.446	375.62	253.914	364.438	282.771	371.07	296.254	369.958	130.449	130.578	148.226	301.176	157.039	317.836	176.917	334.262	197.083	330.395	230.114	353.098	263.768	356.253	301.421	384.131		36	1.28564	0.247412	6.42471	37.1043	9.30868	36.8691	12.0509	41.2157	16.5558	41.6761	21.3083	39.8093	26.1259	40.9165	28.3768
37	130.934	128.166	166.531	352.235	183.99	354.232	197.335	380.352	231.615	384.862	257.325	370.376	285.975	374.22	302.589	374.098	130.205	129.985	147.493	305.207	157.77	319.214	176.622	338.122	196.872	333.661	230.552	356.894	263.522	361.97	302.489	386.217		37	0.777462	0.364942	6.7202	37.7721	9.63489	38.1055	11.8628	42.4661	17.5856	43.219	21.8778	40.8007	26.6608	41.4424	29.4344
38	133.382	129.196	165.466	354.356	186.604	357.384	202.241	384.624	228.932	384.451	257.909	376.16	283.688	381.715	297.869	379.116	128.084	130.194	149.837	305.957	159.959	326.064	176.196	340.107	201.622	338.192	234.338	362.673	267.927	366.177	303.949	390.573		38	1.18614	0.536895	6.5424	38.1262	10.0713	38.6317	12.6818	43.1793	17.1377	43.1504	21.9753	41.7663	26.279	42.6937	28.6464
39	133.012	128.172	168.748	357.71	184.237	360.549	202.477	389.395	230.014	387.778	260.636	380.806	291.971	385.217	300.521	382.649	129.865	132.001	149.177	311.954	159.161	324.553	177.555	345.631	199.971	336.812	235.696	362.73	270.141	368.136	313.143	397.477		39	1.12437	0.365943	7.09032	38.6861	9.67613	39.1601	12.7212	43.9758	17.3184	43.7058	22.4306	42.5419	27.6618	43.2783	29.0891
40	133.608	128.219	169.394	360.335	186.003	361.196	201.917	387.846	232.593	396.788	257.794	383.939	290.716	385.095	304.733	387.296	128.777	129.401	147.539	315.939	160.579	328.059	177.737	348	199.795	345.154	234.208	366.242	272.567	371.536	315.312	403.637		40	1.22387	0.37379	7.19816	39.1244	9.97095	39.2681	12.6277	43.7172	17.7489	45.21	21.9561	43.0649	27.4523	43.2579	29.7923
41	134.715	128.571	168.17	365.515	187.149	363.966	203.193	391.92	232.508	401.487	265.452	384.806	290.358	389.915	308.789	392.381	130.154	130.019	148.437	315.058	158.443	333.103	179.527	351.69	201.561	345.951	239.444	366.728	271.441	374.14	311.359	405.091		41	1.40868	0.432554	6.99382	39.9891	10.1623	39.7306	12.8407	44.3973	17.7347	45.9945	23.2346	43.2097	27.3925	44.0626	30.4694
42	133.949	128.892	168.32	366.424	185.821	368.575	204.767	393.473	233.864	398.095	260.896	388.356	287.352	393.091	310.151	395.362	129.567	130.061	146.988	317.924	159.081	334.409	180.472	353.591	204.571	349.489	243.06	370.999	274.982	376.366	314.806	406.751		42	1.2808	0.486144	7.01886	40.1409	9.94057	40.5	13.1035	44.6566	17.9611	45.4282	22.474	43.8023	26.8907	44.5928	30.6968
43	134.902	129.408	171.717	373.633	189.102	371.608	205.426	405.681	236.254	407.897	264.613	392.922	292.494	399.612	304.974	398.753	130.827	131.815	148.354	319.368	158.787	336.176	182.077	353.358	205.123	353.4	242.621	373.444	275.769	383.474	318.553	412.229		43	1.4399	0.572287	7.58598	41.3444	10.4883	41.0063	13.2135	46.6947	18.3601	47.0646	23.0945	44.5646	27.7491	45.6815	29.8326
44	134.872	129.504	173.697	371.252	190.06	374.971	205.191	408.637	232.94	411.983	263.721	395.585	292.535	403.956	312.676	403.229	129.251	131.133	151.99	321.932	159.083	336.632	180.863	358.686	205.203	355.997	244.49	377.658	277.447	381.608	318.592	413.532		44	1.43489	0.588314	7.91653	40.9469	10.6482	41.5678	13.1743	47.1881	17.8068	47.7467	22.9456	45.0092	27.7559	46.4067	31.1184
45	136.269	129.035	170.787	376.018	186.958	379.139	209.138	409.523	237.695	413.687	268.86	400.964	296.961	406.39	308.785	408.117	131.708	131.455	150.369	326.142	161.85	343.991	182.335	362.961	208.876	358.4	247.875	382.854	280.618	386.639	321.326	424.58		45	1.66811	0.510017	7.43072	41.7426	10.1304	42.2636	13.8332	47.3361	18.6007	48.0312	23.8035	45.9072	28.4948	46.813	30.4688
46	136.263	130.264	167.558	375.293	188.406	382.823	211.561	409.847	239.686	413.01	269.316	401.014	294.818	408.635	301.113	408.721	128.234	129.616	152.382	328.004	160.421	345.66	182.336	363.867	208.528	361.959	253.988	384.176	280.333	387.27	323.604	431.941		46	1.66711	0.715192	6.89165	41.6215	10.3721	42.8786	14.2377	47.3902	18.9331	47.9182	23.8796	45.9155	28.1371	47.1878	29.188
47	136.226	129.585	170.34	378.171	188.946	384.831	207.604	407.587	237.515	417.866	274.834	404.994	300.584	410.747	310.703	416.745	130.566	130.472	148.87	331.328	164.107	345.776	187.131	366.98	213.329	364.63	252.911	387.471	282.223	394.64	322.187	437.779		47	1.66093	0.601836	7.35609	42.102	10.4623	43.2139	13.5771	47.0129	18.5706	48.7289	24.8008	46.58	29.0997	47.5404	30.789
48	134.185	130.505	173.255	376.896	192.102	382.71	213.239	415.35	235.992	423.578	273.063	405.538	303.466	413.625	304.211	415.188	129.531	131.541	150.967	331.93	165.058	351.728	187.073	369.444	213.052	365.211	256.658	388.909	280.659	393.724	321.632	439.346		48	1.3202	0.755426	7.84274	41.8891	10.9891	42.8598	14.5179	48.3088	18.3164	49.6825	24.5052	46.6708	29.5808	48.0209	29.7052
49	136.589	129.64	169.939	381.177	190.51	387.981	211.996	420.548	239.309	426.099	270.868	409.601	305.363	418.076	304.71	424.625	128.31	131.156	153.807	335.52	165.231	353.676	188.353	371.315	215.385	370.513	254.251	391.867	283.937	399.02	321.488	442.06		49	1.72154	0.611018	7.28915	42.6038	10.7234	43.7397	14.3104	49.1766	18.8701	50.1033	24.1387	47.3491	29.8975	48.7639	29.7885
50	138.215	129.539	171.741	384.056	189.912	391.484	209.926	437.603	243.607	428.45	274.365	409.932	292.908	421.182	297.004	424.651	129.407	132.182	152.911	336.956	161.679	352.704	192.893	374.65	216.855	373.32	260.354	388.444	282.163	403.736	327.149	448.631		50	1.99299	0.594157	7.58998	43.0845	10.6235	44.3245	13.9648	52.0239	19.5876	50.4958	24.7225	47.4043	27.8182	49.2825	28.502
51	133.158	130.938	172.749	386.032	196.046	395.996	211.754	433.541	238.315	435.574	276.145	417.188	314.901	428.906	307.493	425.596	127.505	130.717	150.924	341.327	165.403	356.437	188.012	378.269	218	376.361	262.948	394.572	284.104	403.271	328.038	446.196		51	1.14875	0.827713	7.75826	43.4144	11.6476	45.0778	14.2699	51.3457	18.7042	51.6851	25.0197	48.6157	31.4898	50.572	30.2531
52	137.047	128.686	169.536	389.863	191.363	390.207	214.137	433.53	238.764	439.51	284.426	421.868	307.14	423.517	310.112	427.227	130.347	131.964	151.233	345.027	164.219	361.124	189.133	378.945	222.605	377.446	262.143	398.244	283.823	409.098	326.231	447.412		52	1.798	0.451753	7.22187	44.0539	10.8658	44.1114	14.6678	51.3439	18.7791	52.3422	26.4022	49.397	30.1942	49.6723	30.6903
53	139.181	130.384	177.741	390.264	195.791	399.061	218.243	434.162	235.227	440.886	276.983	424.488	305.011	434.114	313.954	432.827	130.765	131.869	152.278	347.049	170.364	362.761	194.834	379.711	221.145	382.061	264.178	401.149	283.751	410.104	327.443	451.49		53	2.15426	0.735225	8.59165	44.1209	11.605	45.5895	15.3533	51.4494	18.1886	52.572	25.1596	49.8344	29.8387	51.4414	31.3317
54	137.403	129.406	177.096	392.631	191.379	400.465	221.053	440.91	243.041	452.063	267.44	431.182	320.242	442.17	313.999	430.806	130.17	132.177	150.732	345.927	174.403	366.331	193.299	381.76	221.092	382.834	264.796	405.317	282.827	410.021	326.46	449.344		54	1.85743	0.571953	8.48397	44.516	10.8684	45.8239	15.8224	52.576	19.4932	54.4379	23.5664	50.9519	32.3815	52.7863	31.3392
55	132.043	129.991	177.551	394.601	186.756	406.897	216.055	451.013	250.112	456.98	263.002	433.887	307.782	444.687	314.898	439.845	124.949	132.174	153.033	349.598	167.516	366.342	192.615	384.157	221.617	384.87	271.5	405.551	291.346	411.649	339.861	456.449		55	0.962604	0.669616	8.55993	44.8449	10.0967	46.8977	14.988	54.2626	20.6736	55.2588	22.8255	51.4035	30.3013	53.2065	31.4893
56	133.304	131.819	177.911	398.119	185.098	412.22	222.619	456.113	238.175	451.873	272.364	433.074	319.773	445.071	330.109	444.142	123.601	132.399	155.708	350.284	171.012	368.354	199.232	388.042	223.242	389.186	275.541	408.515	289.176	418.319	340.914	459.658		56	1.17312	0.974791	8.62003	45.4322	9.81987	47.7863	16.0838	55.114	18.6808	54.4062	24.3885	51.2678	32.3032	53.2706	34.0287
57	132.055	129.991	179.227	399.221	190.992	415.909	218.303	455.059	243.4	451.213	275.843	435.581	307.373	446.093	318.724	446.847	127.453	132.136	148.463	354.731	173.282	372.266	194.842	391.849	221.782	388.466	277.367	411.394	297.249	419.656	341.993	460.608		57	0.964608	0.669616	8.83973	45.6162	10.8038	48.4022	15.3633	54.9381	19.5531	54.296	24.9693	51.6863	30.2331	53.4412	32.128
58	136.231	131.054	180.142	395.658	185.193	415.722	225.659	458.813	232.791	453.183	270.564	443.64	334.03	453.069	324.445	443.666	127.587	133.985	150.697	355.366	172.059	370.855	191.12	392.667	227.689	392.385	267.953	414.676	299.769	423.193	336.234	453.131		58	1.66177	0.847078	8.99249	45.0214	9.83573	48.371	16.5913	55.5648	17.782	54.6249	24.088	53.0317	34.6833	54.6058	33.0831
59	137.913	131.812	175.094	397.773	185.197	418.525	225.788	458.532	252.024	457.357	257.747	451.938	359.259	451.821	317.908	452.448	127.49	133.128	147.62	356.16	170.156	375.444	200.492	394.913	239.7	397.919	267.412	414.359	310.004	425.31	342.349	459.345		59	1.94257	0.973623	8.14975	45.3745	9.83639	48.8389	16.6129	55.5179	20.9928	55.3217	21.9482	54.417	38.8952	54.3975	31.9918
60	141.737	131.829	176.032	399.891	191.805	425.854	221.632	473.365	230.001	461.213	285.366	458.092	335.105	450.308	301.953	457.344	128.462	131.614	148.207	362.453	184.845	375.831	195.054	395.616	237.5	397.804	268.534	420.413	307.736	424.529	366.919	449.51		60	2.58097	0.976461	8.30634	45.728	10.9396	50.0624	15.919	57.9942	17.3162	55.9654	26.5591	55.4444	34.8628	54.1449	29.3282
low in 30'	126.277	125.98															124.641	128.875
	E1	E2	E3	E4	E5	E6	E7	E8	E9	E10	E11	E12	E13	E14	E15	E16	C1	C2	C3	C4	C5	C6	C7	C8	C9	C10	C11	C12	C13	C14	C15	C16
0	145.411	141.86	143.36	142.814	146.445	143.261	152.295	148.792	144.226	145.387	147.776	146.088	146.197	142.002	143.353	139.785	141.041	135.599	132.816	144.676	137.054	135.073	142.774	137.52	145.468	136.855	151.131	136.941	150.623	139.716	141.733	141.474		0	2.9005	2.3172	2.5581	2.47646	3.07312	2.55109	4.04975	3.47446	2.70267	2.90601	3.29533	3.02304	3.03172	2.3409	2.55693
1	133.433	133.041	137.845	138.422	141.43	141.235	144.599	146.667	142.131	143.727	144.487	144.253	146.207	143.874	144.425	142.199	130.354	128.935	127.76	137.135	132.906	137.677	140.306	139.721	138.954	139.803	145.783	138.048	149.309	140.758	140.009	142.943		1	0.900835	0.844908	1.6374	1.74324	2.23589	2.21285	2.76494	3.1197	2.35292	2.62888	2.74624	2.71669	3.03339	2.65342	2.73589
2	132.409	134.136	136.916	141.093	140.081	141.174	143.806	148.958	140.8	149.068	144.755	148.944	148.121	147.771	146.982	146.555	128.605	127.418	127.545	139.209	134.01	140.615	138.323	142.424	137.977	143.029	144.486	144.155	147.543	146.134	145.384	148.023		2	0.729883	1.02771	1.4823	2.18915	2.01068	2.20267	2.63255	3.50217	2.13072	3.52053	2.79098	3.49983	3.35292	3.30401	3.16277
3	131.314	132.77	135.195	140.964	141.803	144.393	141.1	150.132	144.28	149.31	145.724	151.912	149.944	153.812	150.909	148.918	128.63	129.339	127.369	142.806	131.637	144.685	135.889	146.406	140.422	148.855	148.274	148.196	152.413	150.576	149.896	155.386		3	0.547078	0.799666	1.19499	2.16761	2.29816	2.74007	2.1808	3.69816	2.71169	3.56093	2.95275	3.99533	3.65726	4.31252	3.81836
4	131.795	131.449	134.604	145.186	139.232	149.969	142.472	156.061	142.026	154.126	147.965	156.026	152.729	157.856	155.502	157.747	128.955	128.458	128.148	146.444	131.315	148.378	137.78	152.112	141.279	152.378	148.87	152.553	154.535	154.77	155.763	161.406		4	0.627379	0.579132	1.09633	2.87245	1.86895	3.67095	2.40985	4.68798	2.33539	4.36494	3.32688	4.68214	4.1222	4.98765	4.58514
5	132.031	131.981	133.595	146.83	139.375	151.106	144.339	159.361	145.533	157.832	149.972	159.529	154.188	163.932	160.82	161.947	125.18	128.329	127.108	153.254	130.03	154.164	138.096	156.945	143.494	158.15	153.5	157.792	160.051	164.277	163.61	170.016		5	0.666778	0.667947	0.92788	3.14691	1.89282	3.86077	2.72154	5.2389	2.92087	4.98364	3.66194	5.26694	4.36578	6.002	5.47295
6	132.386	131.584	135.47	152.866	139.428	156.738	144.361	162.864	147.545	162.565	151.733	164.335	157.693	173.255	162.687	167.485	125.404	128.02	127.611	156.886	132.759	159.464	139.365	160.408	144.55	162.904	155.791	165.825	163.538	170.557	167.217	179.502		6	0.726043	0.601669	1.2409	4.15459	1.90167	4.801	2.72521	5.82371	3.25676	5.77379	3.95593	6.06928	4.95092	7.55843	5.78464
7	130.675	131.747	135.548	154.681	139.429	160.157	145.175	169.229	145.951	167.88	154.245	169.345	162.271	176.635	169.173	176.503	125.474	129.185	127.733	161.388	131.271	166.006	138.833	167.419	147.939	170.732	160.662	170.597	169.072	177.635	172.153	185.484		7	0.440401	0.628881	1.25392	4.4576	1.90184	5.37179	2.8611	6.88631	2.99065	6.6611	4.37529	6.90568	5.71519	8.1227	6.86745
8	130.48	132.514	135.008	157.365	140.514	166.246	146.684	173.099	148.226	171.587	156.999	175.966	166.983	183.558	170.874	184.174	126.32	128.4	127.258	166.039	131.627	170.787	140.423	173.087	150.071	174.868	163.822	174.352	174.626	186.086	179.896	195.556		8	0.407846	0.756928	1.16377	4.90568	2.08297	6.38831	3.11302	7.53239	3.37045	7.27997	4.83506	8.01102	6.50184	9.27846	7.15142
9	129.887	132.933	135.677	161.79	140.641	170.191	146.981	178.627	150.364	179.4	161.482	181.568	168.889	191.159	174.543	190.434	126.816	128.026	128.905	171.769	132.875	177.228	140.592	179.26	152.579	180.466	169.272	183.346	180.227	193.954	188.775	202.998		9	0.308848	0.826878	1.27546	5.64441	2.10417	7.04691	3.1626	8.45526	3.72738	8.58431	5.58347	8.94624	6.82003	10.5474	7.76394
10	129.984	133.15	135.787	165.381	142.459	175.369	148.496	182	151.015	183.686	164.786	185.872	173.831	195.367	179.518	194.796	127	128.178	128.479	177.222	133.523	182.976	143.318	187.195	155.216	189.664	175.371	191.868	185.44	201.745	194.068	209.597		10	0.325042	0.863105	1.29382	6.24391	2.40768	7.91135	3.41553	9.01836	3.83606	9.29983	6.13506	9.66477	7.64508	11.2499	8.59449
11	132.017	132.953	135.828	170.084	141.669	175.964	149.735	187.78	153.25	188.573	167.865	192.953	177.861	203.85	183.375	199.486	128.922	128.387	129.276	183.455	134.079	186.578	145.002	191.398	157.498	194.326	180.468	198.697	191.188	205.817	198.917	217.336		11	0.664441	0.830217	1.30067	7.02905	2.27579	8.01068	3.62237	9.98331	4.20918	10.1157	6.64908	10.8469	8.31786	12.6661	9.2384
12	133.247	129.97	137.484	174.76	142.004	184.624	153.211	194.146	155.547	193.77	172.24	198.761	182.012	211.469	186.161	206.278	126.607	125.974	130.201	187.284	135.328	193.004	146.283	197.217	161.698	201.142	184.16	205.481	194.496	216.705	204.495	224.693		12	0.869783	0.33222	1.57713	7.80968	2.33172	9.45643	4.20267	11.0461	4.59265	10.9833	7.37947	11.8165	9.01085	13.9381	9.70351
13	132.3	128.585	137.723	178.942	146.905	189.182	154.81	198.931	155.946	200.727	174.478	202.197	186.531	216.045	191.001	211.054	125.816	126.87	131.396	192.926	136.348	197.373	148.189	202.943	165.293	207.432	189.008	209.704	199.803	224.426	212.579	231.844		13	0.711686	0.101002	1.61703	8.50785	3.14992	10.2174	4.46962	11.8449	4.65927	12.1447	7.75309	12.3902	9.76528	14.702	10.5115
14	130.245	127.993	136.662	183.006	144.643	190.627	157.173	204.929	159.407	203.079	178.069	208.018	190.072	221.664	195.434	216.342	126.419	126.267	130.008	198.569	137.42	204.093	149.514	208.155	168.397	213.522	189.221	214.681	202.757	228.072	215.022	242.854		14	0.368614	0.00217028	1.4399	9.18631	2.77229	10.4586	4.86411	12.8462	5.23706	12.5374	8.35259	13.3619	10.3564	15.6401	11.2516
15	128.239	130.09	136.089	186.872	147.526	197.818	158.372	209.568	160.506	209.074	181.691	213.862	195.016	230.251	201.118	222.317	125.983	124.679	132.058	207.008	137.744	211.381	152.447	211.62	170.367	216.31	194.904	223.306	209.738	234.058	222.722	251.684		15	0.0337229	0.352254	1.34424	9.83172	3.25359	11.6591	5.06427	13.6207	5.42053	13.5382	8.95726	14.3376	11.1818	17.0736	12.2005
16	128.037	127.98	136.782	192.964	148.538	200.974	161.974	213.767	162.935	213.155	184.839	218.724	196.806	233.88	204.917	227.026	127.525	125.962	132.559	208.556	140.802	215.42	152.897	219.375	174.711	225.543	200.629	227.606	215.104	239.427	231.025	256.134		16	0	0	1.45993	10.8487	3.42254	12.186	5.66561	14.3217	5.82604	14.2195	9.4828	15.1492	11.4806	17.6795	12.8347
17	129.244	129.445	138.281	198.567	147.51	210.49	162.267	216.748	166.464	219.314	189.534	223.412	202.6	239.699	209.855	231.122	126.181	124.707	134.059	212.716	141.611	219.573	156.017	226.324	173.858	229.104	202.208	232.922	216.881	246.123	236.702	262.177		17	0.201503	0.244574	1.71018	11.7841	3.25092	13.7746	5.71452	14.8194	6.41519	15.2477	10.2666	15.9319	12.4479	18.6509	13.6591
18	129.553	130.194	140.463	204.078	149.018	217.37	164.312	223.121	168.315	223.153	191.403	229.002	207.033	248.171	214.112	235.462	127.275	125.738	134.231	220.098	143.154	223.545	156.335	230.315	174.69	233.6	205.233	236.954	220.892	252.604	240.42	269.504		18	0.253088	0.369616	2.07446	12.7042	3.50267	14.9232	6.05593	15.8833	6.72421	15.8886	10.5786	16.8651	13.188	20.0653	14.3698
19	129.044	129.433	143.205	207.223	150.123	219.491	164.71	228.406	171.464	226.633	195.216	235.148	212.68	250.66	218.896	248.129	126.005	126.209	134.695	223.657	141.589	229.431	158.347	236.098	176.339	238.988	203.14	240.637	221.238	260.709	244.262	275.464		19	0.168114	0.242571	2.53222	13.2292	3.68715	15.2773	6.12237	16.7656	7.24992	16.4696	11.2152	17.8912	14.1307	20.4808	15.1684
20	128.917	130.1	144.691	209.481	152.748	228.373	166.257	232.798	173.07	234.574	198.322	239.502	216.777	259.122	224.606	251.105	125.865	125.768	137.52	227.055	144.881	234.737	161.162	241.271	181.116	245.051	206.879	247.719	220.363	265.828	241.971	281.94		20	0.146912	0.353923	2.7803	13.6062	4.12538	16.7601	6.38063	17.4988	7.51803	17.7953	11.7337	18.618	14.8147	21.8935	16.1217
21	128.969	130.2	142.49	216.11	153.029	230.417	170.37	238.217	175.222	239.215	203.258	244.759	220.075	265.417	226.48	255.494	127.67	125.218	135.954	231.397	146.723	240.124	162.025	244.719	183.852	251.255	213.135	252.161	233.959	272.961	245.645	287.316		21	0.155593	0.370618	2.41285	14.7129	4.17229	17.1013	7.06728	18.4035	7.8773	18.5701	12.5578	19.4957	15.3653	22.9444	16.4346
22	128.144	128.734	144.975	219.497	156.826	237.984	171.403	244.488	178.556	246.016	206.544	252.492	221.718	270.998	229.979	263.449	127.554	125.452	136.159	236.96	145.141	241.631	162.232	252.056	183.053	256.513	215.559	258.467	236.931	278.777	258.157	294.495		22	0.0178631	0.125876	2.82771	15.2783	4.80618	18.3646	7.23973	19.4504	8.43389	19.7055	13.1063	20.7866	15.6396	23.8761	17.0187
23	128.265	130.083	144.424	226.054	157.121	243.38	173.185	251.312	177.922	248.912	211.126	258.656	224.724	278.667	236.597	267.996	128.192	126.069	139.433	240.214	146.534	247.106	164.014	255.428	185.723	260.104	218.383	262.439	237.99	285.089	255.876	300.212		23	0.0380634	0.351085	2.73573	16.373	4.85543	19.2654	7.53723	20.5896	8.32805	20.189	13.8713	21.8157	16.1414	25.1564	18.1235
24	129.636	131.529	146.936	230.764	159.905	248.882	174.593	253.777	179.964	256.211	211.073	261.417	230.302	284.954	241.068	273.512	127.396	125.474	138.411	246.268	148.491	250.819	167.138	259.69	185.576	262.157	221.059	269.636	240.497	289.509	263.38	306.237		24	0.266945	0.592487	3.15509	17.1593	5.3202	20.184	7.77229	21.0012	8.66895	21.4075	13.8624	22.2766	17.0726	26.206	18.8699
25	130.946	129.443	146.734	236.115	156.999	252.974	176.231	261.314	182.947	262.362	216.622	266.684	236.369	287.91	247.046	279.476	128.326	125.843	137.81	248.928	149.837	258.146	166.307	265.762	188.039	267.95	221.588	274.263	242.527	291.59	265.039	310.221		25	0.485643	0.24424	3.12137	18.0526	4.83506	20.8671	8.04574	22.2594	9.16694	22.4344	14.7888	23.1559	18.0855	26.6995	19.8679
26	130.289	129.438	146.521	240.384	158.334	255.555	177.5	266.057	187.081	265.046	218.854	270.63	234.651	292.511	246.466	284.549	128.574	126.703	140.462	256.038	148.674	260.663	167.523	268.565	190.13	273.356	225.142	279.001	245.426	296.444	270.768	319.152		26	0.37596	0.243406	3.08581	18.7653	5.05793	21.298	8.2576	23.0513	9.8571	22.8825	15.1614	23.8147	17.7987	27.4676	19.7711
27	129.486	132.001	147.081	244.024	160.264	261.853	178.184	271.776	186.438	269.9	223.13	275.588	235.109	297.162	256.208	289.836	129.478	124.61	140.008	259.266	150.751	264.466	169.727	274.85	193.284	279.463	226.523	282.437	249.944	302.34	274.544	322.331		27	0.241903	0.671285	3.1793	19.373	5.38013	22.3494	8.37179	24.006	9.74975	23.6928	15.8753	24.6424	17.8751	28.2441	21.3975
28	128.855	129.308	148.297	247.536	161.551	265.802	179.381	277.35	185.903	273.07	223.144	280.201	239.627	303.992	261.041	291.705	130.336	125.579	141.009	261.189	150.268	267.873	169.873	276.967	194.139	283.988	225.666	287.673	250.054	309.237	277.658	326.165		28	0.136561	0.221703	3.3823	19.9593	5.59499	23.0087	8.57162	24.9366	9.66043	24.222	15.8776	25.4125	18.6294	29.3843	22.2043
29	130.83	130.846	148.791	251.372	162.536	271.706	181.606	282.03	190.053	279.721	220.303	286.081	242.654	309.375	264.471	297.279	128.865	126.115	141.562	264.843	151.927	271.965	169.095	280.866	193.867	287.027	230.859	290.69	252.613	314.002	280.747	329.931		29	0.466277	0.478464	3.46477	20.5997	5.75943	23.9943	8.94307	25.7179	10.3533	25.3324	15.4033	26.3942	19.1347	30.283	22.777
30	129.407	130.866	149.913	257.739	163.663	275.341	181.978	286.084	189.442	283.612	225.039	292.707	244.271	311.408	259.715	304.026	128.542	126.324	140.473	269.066	150.48	275.175	171.475	285.299	195.645	289.624	230.939	296.494	254.068	315.171	283.516	334.741		30	0.228715	0.481803	3.65209	21.6626	5.94758	24.6012	9.00518	26.3947	10.2513	25.982	16.194	27.5003	19.4047	30.6224	21.983
31	130.983	128.641	151.17	260.353	163.848	280.441	184.001	288.523	190.356	289.236	228.763	297.662	246.206	315.815	263.234	309.896	128.195	125.713	141.364	272.536	150.671	278.627	172.707	285.793	198.204	297.926	235.812	300.706	257.059	318.79	287.085	342.54		31	0.49182	0.110351	3.86194	22.099	5.97846	25.4526	9.3429	26.8018	10.4038	26.9209	16.8157	28.3275	19.7277	31.3581	22.5705
32	129.84	130.321	150.548	262.956	165.654	283.643	183.738	296.843	190.089	292.838	227.692	301.61	255.839	322.665	269.628	313.074	128.445	125.552	144.323	274.604	153.673	281.785	174.656	294.115	198.18	297.22	233.338	301.954	256.871	324.397	288.245	345.386		32	0.301002	0.390818	3.7581	22.5336	6.27997	25.9871	9.299	28.1908	10.3593	27.5222	16.6369	28.9866	21.3359	32.5017	23.6379
33	130.878	130.288	150.914	264.849	165.146	287.854	184.47	298.902	196.142	299.549	231.411	306.496	257.33	323.546	273.365	315.601	130.671	127.05	143.674	278.421	153.867	285.101	173.221	297.209	200.149	302.485	239.709	306.975	259.272	327.834	288.888	349.632		33	0.47429	0.385309	3.8192	22.8496	6.19516	26.6902	9.4212	28.5346	11.3698	28.6426	17.2578	29.8023	21.5848	32.6487	24.2618
34	131.494	129.561	152.954	270.257	166.818	291.65	186.311	304.47	195.205	300.905	230.226	308.901	258.969	331.314	275.394	323.123	130.574	126.151	143.345	281.411	155.265	288.506	176.736	296.772	203.038	305.521	242.295	310.858	263.332	332.412	293.67	354.014		34	0.577129	0.26394	4.15977	23.7524	6.47429	27.3239	9.72855	29.4641	11.2134	28.8689	17.0599	30.2038	21.8584	33.9456	24.6005
35	132.614	129.713	150.134	272.046	168.531	297.478	188.185	304.915	196.785	305.898	232.436	314.167	260.796	334.218	275.977	324.724	129.804	126.198	144.025	285.126	156.54	291.544	176.883	302.993	201.963	309.017	239.826	314.162	263.862	335.906	293.831	358.324		35	0.764107	0.289316	3.68898	24.0511	6.76027	28.2968	10.0414	29.5384	11.4771	29.7025	17.4289	31.083	22.1634	34.4304	24.6978
36	130.623	131.936	151.143	277.093	168.253	299.999	187.591	309.362	199.244	312.857	238.524	321.345	262.964	338.112	279.771	330.878	130.416	127.341	144.581	287.62	155.44	296.319	177.505	302.165	203.086	312.847	244.474	317.282	263.946	337.492	292.958	363.987		36	0.43172	0.660434	3.85743	24.8937	6.71386	28.7177	9.94224	30.2808	11.8876	30.8643	18.4452	32.2813	22.5254	35.0805	25.3312
37	131.656	131.369	152.085	280.077	168.651	303.328	188.192	317.607	198.898	315.983	240.315	322.095	265.875	342.196	282.166	332.509	129.92	126.729	144.345	291.938	157.283	298.465	179.663	307.457	206.461	316.358	245.124	320.109	262.962	343.019	298.776	367.607		37	0.604174	0.565776	4.01469	25.3918	6.7803	29.2735	10.0426	31.6573	11.8299	31.3861	18.7442	32.4065	23.0114	35.7623	25.7311
38	132.191	132.038	153.297	284.578	169.547	305.773	188.813	313.636	200.644	320.175	244.071	328.733	268.971	347.138	284.262	337.587	130.413	126.156	147.616	296.036	157.136	299.631	178.492	309.79	205.792	316.691	246.511	323.668	267.53	343.336	295.759	371.236		38	0.693489	0.677462	4.21703	26.1432	6.92988	29.6816	10.1462	30.9943	12.1214	32.086	19.3713	33.5147	23.5282	36.5873	26.081
39	130.231	132.362	153.176	286.911	170.891	310.713	187.169	322.826	202.62	324.01	244.047	329.882	268.981	350.768	288.899	338.737	128.79	126.477	146.006	296.039	159.254	305.103	181.851	313.31	207.705	322.29	248.636	326.322	268.896	347.826	300.993	373.612		39	0.366277	0.731553	4.19683	26.5327	7.15426	30.5063	9.87179	32.5285	12.4513	32.7262	19.3673	33.7065	23.5299	37.1933	26.8551
40	133.426	130.894	153.005	291.301	169.295	314.465	189.982	326.279	201.856	327.128	244.433	335.72	272.242	352.903	289.084	342.762	128.282	126.614	145.247	298.312	158.927	304.99	182.356	317.146	208.856	325.369	246.933	332.524	269.239	353.359	302.288	381.125		40	0.899666	0.486477	4.16828	27.2656	6.88781	31.1327	10.3414	33.105	12.3237	33.2467	19.4317	34.6811	24.0743	37.5497	26.886
41	132.307	128.384	153.853	293.414	171.115	317.451	192.738	330.227	202.865	329.167	245.477	336.466	276.898	356.365	290.377	347.672	130.934	128.85	147.938	301.71	160.298	309.712	182.715	321.101	211.463	325.634	249.661	332.673	269.699	354.785	301.388	379.86		41	0.712855	0.0674457	4.30985	27.6184	7.19165	31.6312	10.8015	33.7641	12.4922	33.5871	19.606	34.8057	24.8516	38.1277	27.1018
42	131.063	130.813	155.128	297.479	172.702	319.51	194.51	333.831	207.057	333.424	245.727	340.874	278.768	358.739	293.62	350.954	129.936	127.598	148.27	305.177	162.032	310.336	182.908	320.63	211.737	330.983	252.105	338.5	272.766	359.519	304.89	386.301		42	0.505175	0.472955	4.5227	28.297	7.45659	31.975	11.0973	34.3658	13.192	34.2978	19.6477	35.5416	25.1638	38.524	27.6432
43	132.547	131.622	155.825	298.616	172.479	324.398	193.001	336.173	206.543	335.981	247.55	346.721	278.783	360.423	292.214	355.512	129.54	127.317	148.751	307.271	161.937	312.85	184.37	323.002	211.133	333.174	254.877	339.586	275.94	358.078	303.694	388.225		43	0.752922	0.608013	4.63907	28.4868	7.41937	32.791	10.8454	34.7568	13.1062	34.7247	19.9521	36.5177	25.1663	38.8052	27.4085
44	133.503	129.148	154.743	303.12	172.608	325.481	195.043	336.817	205.92	339.691	246.548	348.156	278.658	369.746	292.855	359.259	129.747	128.858	150.439	307.08	163.615	314.3	183.777	326.634	214.433	335.812	254.029	338.854	279.678	360.044	302.902	395.239		44	0.912521	0.194992	4.45843	29.2387	7.4409	32.9718	11.1863	34.8643	13.0022	35.3441	19.7848	36.7573	25.1454	40.3616	27.5155
45	132.784	129.857	155.553	306.708	173.028	332.874	195.788	343.576	206.765	346.532	250.956	356.097	279.425	371.509	296.018	361.777	129.153	127.878	150.685	309.105	162.736	319.537	187.414	328.77	211.391	339.534	258.058	345.623	276.277	364.98	309.02	394.596		45	0.792487	0.313356	4.59366	29.8377	7.51102	34.206	11.3107	35.9927	13.1432	36.4861	20.5207	38.083	25.2735	40.6559	28.0436
46	134.713	130.974	157.142	306.481	173.503	330.918	193.904	345.701	207.081	347.977	248.212	354.857	283.795	377.278	299.15	366.858	131.443	128.264	149.325	314.407	163.077	320.222	187.913	329.3	215.256	344.573	259.034	346.63	277.381	363.525	310.763	396.907		46	1.11452	0.499833	4.85893	29.7998	7.59032	33.8795	10.9962	36.3474	13.196	36.7274	20.0626	37.876	26.003	41.619	28.5664
47	132.485	131.512	156.491	310.246	174.617	335.623	194.425	348.411	208.679	351.872	249.116	365.525	283.077	377.477	298.49	368.961	128.879	128.893	150.796	316.846	164.668	319.829	188.357	330.816	216.799	346.466	263.804	349.646	282.818	371.239	308.754	400.369		47	0.742571	0.589649	4.75025	30.4284	7.77629	34.6649	11.0831	36.7998	13.4628	37.3776	20.2135	39.6569	25.8831	41.6523	28.4563
48	132.415	131.936	158.275	312.075	173.035	336.822	195.385	353.746	208.987	354.968	251.655	366.017	279.904	379.86	301.018	370.042	129.345	129.312	148.847	319.17	166.101	322.135	190.821	336.142	218.686	346.624	262.327	352.992	282.184	373.731	308.84	408.1		48	0.730885	0.660434	5.04808	30.7337	7.51219	34.8651	11.2434	37.6905	13.5142	37.8945	20.6374	39.7391	25.3534	42.0501	28.8783
49	133.26	132.098	155.204	314.595	173.358	340.222	196.411	357.652	208.772	360.112	255.611	365.6	285.011	384.028	304.045	373.575	129.318	128.554	152.12	319.315	166.377	325.21	192.197	339.18	218.614	350.386	261.202	354.314	283.231	378.4	314.046	416.425		49	0.871953	0.687479	4.53539	31.1544	7.56611	35.4327	11.4147	38.3426	13.4783	38.7533	21.2978	39.6694	26.206	42.7459	29.3836
50	133.914	133.05	155.851	315.596	172.584	345.659	199.523	354.996	210.089	358.16	252.038	368.366	284.671	386.37	305.503	376.816	128.817	129.221	149.556	321.648	162.884	325.207	191.702	341	218.113	352.434	261.252	357.469	284.274	380.069	312.775	413.741		50	0.981135	0.846411	4.64341	31.3215	7.43689	36.3404	11.9342	37.8992	13.6982	38.4274	20.7013	40.1312	26.1492	43.1369	29.627
51	132.315	132.269	158.991	319.441	173.696	345.46	193.272	358.798	210.689	367.488	248.24	371.731	284.431	393.837	305.846	380.214	128.786	129.889	149.913	325.052	164.776	330.075	191.795	343.178	224.377	352.956	261.273	359.273	286.74	379.376	317.217	415.507		51	0.71419	0.716027	5.16761	31.9634	7.62254	36.3072	10.8907	38.5339	13.7983	39.9846	20.0673	40.693	26.1092	44.3835	29.6843
52	135.03	131.538	158.248	323.507	172.875	346.484	196.633	364.503	211.166	366.316	255.984	377.508	287.677	392.749	302.54	383.88	127.721	129.31	148.989	322.992	166.354	329.708	193.969	343.673	225.043	358.333	267.956	361.655	289.175	383.044	314.164	419.039		52	1.16745	0.59399	5.04357	32.6422	7.48548	36.4781	11.4518	39.4863	13.878	39.789	21.3601	41.6574	26.6511	44.2018	29.1324
53	132.6	132.352	157.255	324.397	172.829	347.797	199.379	365.809	206.436	370.104	256.224	378.12	290.18	396.128	306.092	385.972	132.912	128.482	155.66	326.214	167.01	332.042	192.155	345.306	221.52	360.11	266.121	363.71	287.389	383.73	311.274	424.812		53	0.76177	0.729883	4.8778	32.7908	7.4778	36.6973	11.9102	39.7043	13.0883	40.4214	21.4002	41.7596	27.0689	44.7659	29.7254
54	131.808	134.135	157.6	329.793	173.224	351.116	197.368	368.424	212.615	372.731	253.941	382.032	286.06	398.044	305.504	387.853	128.346	128.828	155.366	330.122	166.929	337.352	192.884	346.096	227.685	361.907	272.603	365.161	289.128	387.151	309.36	428.587		54	0.629549	1.02755	4.93539	33.6917	7.54374	37.2514	11.5745	40.1409	14.1199	40.8599	21.019	42.4127	26.3811	45.0858	29.6272
55	131.06	133.985	157.49	329.365	174.846	353.245	195.257	371.455	212.356	372.564	255.315	386.248	285.965	400.733	310.192	389.911	127.744	129.34	151.848	334.727	166.599	338.539	194.112	350.198	223.38	365.617	272.462	371.616	292.058	389.965	314.019	425.364		55	0.504674	1.0025	4.91703	33.6202	7.81452	37.6068	11.222	40.6469	14.0766	40.8321	21.2484	43.1165	26.3653	45.5347	30.4098
56	133.729	133.157	160.2	332.555	173.489	358.882	195.16	373.271	213.077	378.775	260.656	389.733	292.081	404.509	303.326	396.508	127.36	127.408	157.115	334.998	172.745	339.458	198.005	352.252	232.391	366.378	274.72	372.865	286.757	394.454	316.155	425.405		56	0.95025	0.864274	5.36945	34.1528	7.58798	38.5479	11.2058	40.9501	14.197	41.8689	22.1401	43.6983	27.3863	46.1651	29.2636
57	135.211	133.607	159.13	334.109	173.176	360.423	193.773	372.184	212.269	377.924	255.985	392.803	283.779	407.027	309.303	397.815	130.809	128.377	153.484	333.195	175.71	340.984	204.705	354.335	226.907	366.922	271.677	372.994	282.587	395.955	322.423	433.399		57	1.19766	0.939399	5.19082	34.4122	7.53573	38.8052	10.9743	40.7686	14.0621	41.7269	21.3603	44.2109	26.0003	46.5855	30.2614
58	132.815	133.199	158.328	333.935	173.887	360.692	198.229	376.551	211.252	382.213	255.873	395.57	293.892	408.878	317.504	398.891	126.84	130.499	153.589	337.801	177.045	342.989	204.127	356.076	227.833	369.142	266.966	378.503	304.006	396.185	319.998	443.187		58	0.797663	0.871285	5.05693	34.3831	7.65442	38.8501	11.7182	41.4977	13.8923	42.4429	21.3416	44.6728	27.6886	46.8945	31.6306
59	134.727	133.449	159.976	337.631	175.169	364.696	200.306	376.742	215.853	382.979	256.205	394.483	294.448	412.803	307.626	401.931	122.23	128.178	150.444	336.982	175.054	344.051	196.615	358.289	224.869	370.35	274.621	375.621	308.537	400.032	308.13	437.91		59	1.11686	0.913022	5.33205	35.0002	7.86845	39.5185	12.0649	41.5295	14.6604	42.5708	21.397	44.4913	27.7815	47.5497	29.9815
60	135.342	133.632	158.708	339.845	174.628	365.21	200.609	382.586	218.099	387.597	261.017	401.32	304.669	417.244	308.742	407.492	129.823	130.414	151.667	340.829	180.408	344.178	198.823	360.776	234.178	372.478	278.188	379.123	308.008	406.122	301.124	440.18		60	1.21953	0.943573	5.12037	35.3698	7.77813	39.6043	12.1155	42.5052	15.0354	43.3417	22.2003	45.6327	29.4878	48.2912	30.1678
low in 30'	128.037	127.98															125.18	124.61
	B1	B2	B3	B4	B5	B6	B7	B8	B9	B10	B11	B12	B13	B14	B15	B16	E1	E2	E3	E4	E5	E6	E7	E8	E9	E10	E11	E12	E13	E14	E15	E16
0	140.99	152.864	140.019	148.256	144.774	153.215	148.985	158.695	148.521	146.382	156.206	160.795	152.858	146.149	142.038	144.877	139.748	130.105	134.079	136.883	136.56	133.417	138.02	138.15	137.185	138.718	140.669	140.256	138.922	135.199	139.426	132.115		0	2.64007	4.16544	2.47796	3.39616	3.27179	4.22404	3.97479	5.1389	3.89733	3.08331	5.1803	5.48948	4.62137	3.04441	2.81503
1	132.979	137.002	135.892	142.996	141.086	146.452	145.83	158.633	149.381	145.618	152.104	161.647	152.307	146.349	147.031	147.578	129.191	124.507	129.805	134.975	133.296	135.535	137.005	139.819	134.59	141.819	141.421	140.75	140.943	137.355	140.375	135.023		1	1.30267	1.51736	1.78898	2.51803	2.65609	3.09499	3.44808	5.12855	4.0409	2.95576	4.49549	5.63172	4.52938	3.0778	3.64858
2	131.118	136.313	135.537	143.848	141.637	149.708	146.762	160.862	147.48	149.056	153.139	162.979	150.635	151.889	148.953	150.634	126.459	125.278	130.201	136.417	132.43	138.124	136.702	140.985	135.438	141.994	140.824	143.391	142.345	141.695	143.824	140.257		2	0.991987	1.40234	1.72972	2.66027	2.74808	3.63856	3.60367	5.50067	3.72354	3.52972	4.66828	5.85409	4.25025	4.00267	3.96945
3	129.279	134.645	135.323	147.377	141.938	152.676	146.452	162.464	149.17	151.316	153.103	165.652	154.463	155.854	152.76	155.158	127.963	124.868	126.579	138.723	131.217	139.919	135.646	143.158	137.545	145.962	143.781	145.821	147.119	145.996	145.732	145.006		3	0.684975	1.12387	1.69399	3.24942	2.79833	4.13406	3.55192	5.76811	4.00568	3.90701	4.66227	6.30033	4.88932	4.66461	4.60501
4	128.54	133.76	136.947	151.353	140.104	155.535	146.477	166.631	147.742	158.019	154.78	168.103	154.586	161.515	156.262	162.591	126.583	125.79	128.342	142.964	130.545	142.6	136.792	149.068	137.477	149.251	146.181	151.437	150.127	150.452	150.669	151.16		4	0.561603	0.976127	1.96511	3.91319	2.49215	4.61135	3.55609	6.46377	3.76728	5.02604	4.94224	6.70952	4.90985	5.60968	5.18965
5	129.692	132.637	132.997	155.819	143.657	158.919	147.093	168.446	151.438	162.571	154.425	168.533	157.426	167.518	160.417	169.477	125.685	125.137	128.239	144.133	132.554	148.278	138.544	154.559	139.929	154.522	149.202	155.875	154.889	158.182	154.913	158.06		5	0.753923	0.788648	1.30568	4.65876	3.08531	5.17629	3.65893	6.76678	4.38431	5.78598	4.88297	6.7813	5.38397	6.61185	5.88331
6	128.298	132.785	135.704	161.434	142.263	164.887	146.903	173.558	150.894	170.078	156.106	173.295	157.699	172.94	165.129	177.789	125.287	124	128.082	151.063	132.713	152.806	138.143	157.048	140.091	159.836	152.176	161.839	155.947	161.634	160.375	167.071		6	0.521202	0.813356	1.7576	5.59616	2.85259	6.17262	3.62721	7.6202	4.29349	7.03923	5.16361	7.57629	5.42955	7.51703	6.66995
7	128.116	133.214	134.06	165.722	141.095	169.143	147.123	177.74	151.385	174.971	158.494	177.153	162.422	178.948	170.234	185.158	126.755	124.841	128.582	154.064	132.287	156.736	138.339	161.122	142.119	161.788	156.457	166.373	161.625	170.225	164.035	174.205		7	0.490818	0.884975	1.48314	6.31202	2.6576	6.88314	3.66394	8.31836	4.37546	7.85609	5.56227	8.22037	6.21803	8.52003	7.5222
8	129.653	133.252	135.509	170.861	143.353	173.787	145.676	182.583	155.327	183.527	159.195	182.205	163.868	186.439	178.045	192.102	126.869	121.007	128.686	159.96	133.734	160.677	141.559	168.006	145.834	169.67	158.437	173.503	165.029	176.621	165.997	182.343		8	0.747412	0.891319	1.72504	7.16995	3.03456	7.65843	3.42237	9.12688	5.03356	9.28447	5.6793	9.06377	6.45943	9.77062	8.82621
9	129.356	132.397	135.97	176.533	144.988	181.191	149.193	187.266	153.438	187.871	162.899	186.687	165.415	192.374	181.89	201.156	125.132	121.381	128.507	162.243	133.997	166.839	141.614	171.763	149.278	172.962	161.863	177.808	170.693	182.563	172.358	188.633		9	0.69783	0.748581	1.802	8.11686	3.30751	8.89449	4.00952	9.90868	4.7182	10.0097	6.29766	9.81202	6.7177	10.7614	9.46811
10	128.781	130.886	136.829	182.393	144.743	184.953	149.008	193.321	157.283	194.311	164.229	194.82	169.831	200.863	186.922	207.25	125.013	121.738	128.768	167.751	134.031	171.816	144.646	177.729	151.954	179.488	167.195	184.987	173.575	189.779	178.625	196.245		10	0.601836	0.496327	1.94541	9.09516	3.26661	9.52254	3.97863	10.9195	5.3601	11.0848	6.5197	11.1698	7.45492	12.1786	10.3082
11	130.624	133.141	137.444	188.97	146.688	191.749	149.947	196.937	158.085	203.799	166.743	201.317	171.576	203.641	194.429	211.536	126.663	121.933	130.288	173.234	135.029	175.255	145.416	183.141	154.848	185.207	170.286	188.941	176.201	195.075	181.129	203.087		11	0.909516	0.872788	2.04808	10.1932	3.59132	10.6571	4.13539	11.5232	5.49399	12.6688	6.9394	12.2544	7.74624	12.6424	11.5614
12	128.669	130.122	139.25	194.308	148.107	197.886	153.613	205.542	161.235	206.717	168.516	205.185	176.219	212.59	197.978	219.273	126.377	122.657	129.837	176.001	135.691	181.06	147.676	188.259	155.909	190.582	173.395	195.378	183.566	200.752	185.829	209.142		12	0.583139	0.368781	2.34958	11.0843	3.82821	11.6816	4.74741	12.9598	6.01987	13.1559	7.23539	12.9002	8.52137	14.1364	12.1539
13	129.833	131.079	140.822	199.751	148.362	203.789	154.457	209.33	164.83	215.432	172.947	212.584	179.054	219.311	205.913	228.78	124.253	124.033	131.423	179.87	138.523	186.827	148.612	194.833	160.325	196.336	178.801	200.27	187.677	206.949	192.521	217.565		13	0.777462	0.528548	2.61202	11.993	3.87078	12.6671	4.88831	13.5922	6.62003	14.6109	7.97513	14.1354	8.99466	15.2584	13.4786
14	126.766	130.571	141.309	206.693	152.515	209.007	155.915	215.39	166.092	220.018	175.206	218.655	184.484	227.836	209.421	234.912	122.686	121.586	132.464	185.878	136.818	189.739	150.743	200.472	161.334	199.909	181.391	207.937	192.696	212.602	196.504	223.602		14	0.265442	0.44374	2.69332	13.1519	4.56411	13.5382	5.13172	14.6038	6.83072	15.3765	8.35225	15.1489	9.90117	16.6816	14.0643
15	125.234	128.509	141.926	210.998	152.88	216.465	159.588	222.12	169.499	226.113	178.646	224.608	186.595	233.299	215.9	243.182	121.485	122.79	131.617	187.796	138.864	195.2	154.104	203.378	164.579	206.353	184.668	213.455	198.364	217.897	200.358	230.157		15	0.0096828	0.0994992	2.79633	13.8706	4.62504	14.7833	5.74491	15.7274	7.3995	16.394	8.92654	16.1427	10.2536	17.5937	15.1459
16	126.009	128.479	145.438	219.086	155.106	219.885	162.219	225.068	172.172	232.922	180.354	228.599	191.881	236.161	222.727	247.111	121.826	121.039	134.768	194.756	140.158	199.926	153.696	210.058	169.877	210.037	189.914	217.787	200.882	224.065	207.658	237.388		16	0.139065	0.0944908	3.38264	15.2209	4.99666	15.3543	6.18414	16.2195	7.84574	17.5307	9.21169	16.809	11.1361	18.0715	16.2856
17	126.484	127.913	146.932	225.322	155.651	226.07	163.5	232.974	173.657	242.242	185.046	231.078	195.748	242.189	227.781	255.075	125.171	122.09	134.588	197.523	141.315	204.667	156.426	213.443	171.727	217.649	193.496	220.618	205.691	231.236	209.302	244.582		17	0.218364	0	3.63205	16.2619	5.08765	16.3868	6.398	17.5394	8.09366	19.0866	9.99499	17.2229	11.7816	19.0778	17.1294
18	127.012	130.383	147.586	229.54	158.366	231.235	165.024	243.994	177.269	246.599	185.871	240.616	196.01	250.873	232.096	261.997	124.22	121.908	133.727	201.965	139.787	208.509	159.228	220.237	172.771	219.658	197.01	228.169	204.719	238.126	217.421	248.884		18	0.306511	0.412354	3.74124	16.9661	5.5409	17.2491	6.65242	19.3791	8.69666	19.814	10.1327	18.8152	11.8254	20.5275	17.8497
19	125.374	129.438	149.43	238.8	159.119	239.953	166.658	248.806	179.937	253.964	191.683	250.234	201.284	258.307	237.317	267.731	123.905	121.119	133.787	202.383	142.344	212.651	159.442	224.772	174.113	225.862	198.7	233.226	202.391	243.879	218.497	255.849		19	0.0330551	0.254591	4.04908	18.512	5.66661	18.7045	6.92521	20.1825	9.14207	21.0436	11.103	20.4209	12.7058	21.7686	18.7214
20	125.176	130.146	149.175	244.387	161.247	246.314	167.78	254.252	180.805	261.477	194.958	256.863	201.609	263.146	242.32	273.855	122.428	122.926	132.71	208.049	142.28	215.696	160.143	224.973	174.663	229.339	193.968	236.009	209.287	248.607	224.86	259.844		20	0	0.372788	4.00651	19.4447	6.02187	19.7664	7.11252	21.0917	9.28698	22.2978	11.6497	21.5275	12.7601	22.5765	19.5566
21	125.787	129.776	149.92	249.302	163.603	251.963	169.132	262.974	186.556	265.183	197.334	261.269	205.996	268.552	240.007	281.482	124.036	123.32	133.958	211.79	144.875	221.433	161.85	230.845	177.029	236.231	197.131	242.279	210.875	253.285	221.185	267.347		21	0.102003	0.311018	4.13088	20.2653	6.41519	20.7095	7.33823	22.5477	10.2471	22.9165	12.0464	22.2631	13.4925	23.479	19.1705
22	125.696	129.423	150.072	253.087	164.6	256.813	171.81	270.85	186.534	272.608	200.458	269.176	210.116	275.565	240.213	284.903	122.725	124.01	133.848	217.27	145.349	221.082	165.391	234.66	179.875	239.356	202.982	244.051	220.067	257.548	229.929	272.487		22	0.0868114	0.252087	4.15626	20.8972	6.58164	21.5192	7.78531	23.8626	10.2434	24.1561	12.5679	23.5831	14.1803	24.6497	19.2048
23	126.292	128.895	150.294	261.93	168.745	265.516	173.78	275.743	188.854	278.643	204.587	273.617	212.857	282.419	243.314	293.485	123.454	121.517	134.931	217.897	146.675	226.793	166.884	237.9	181.976	242.017	205.788	253.809	224.196	265.03	231.286	278.44		23	0.186311	0.16394	4.19332	22.3735	7.27362	22.9721	8.11419	24.6795	10.6307	25.1636	13.2573	24.3245	14.6379	25.794	19.7225
24	127.09	128.106	151.738	267.94	168.033	271.338	172.976	283.774	188.146	282.064	207.56	282.014	217.758	288.979	259.283	297.045	123.449	122.611	134.437	224.932	148.456	232.291	167.893	244.095	185.792	248.266	206.467	257.833	229.529	268.325	232.909	282.993		24	0.319533	0.0322204	4.43439	23.3768	7.15476	23.9441	7.97997	26.0202	10.5125	25.7347	13.7536	25.7264	15.4561	26.8891	22.3885
25	127.687	129.083	151.467	271.053	168.544	276.334	179.444	289.443	189.912	289.934	207.422	284.421	217.812	291.966	262.78	303.492	122.96	122.718	136.115	225.67	148.354	234.863	168.057	248.923	184.776	250.563	208.47	261.557	228.554	272.51	235.901	288.064		25	0.419199	0.195326	4.38915	23.8965	7.24007	24.7781	9.05977	26.9666	10.8073	27.0486	13.7306	26.1282	15.4651	27.3878	22.9723
26	126.939	128.371	153.907	280.79	170.038	281.625	181.805	293.82	195.193	293.366	210.856	293.585	220.099	298.061	264.63	309.941	122.701	123.853	135.96	229.34	149.065	238.241	168.015	253.196	190.038	255.463	212.788	265.603	231.277	276.538	239.474	293.858		26	0.294324	0.0764608	4.79649	25.522	7.48948	25.6614	9.45392	27.6973	11.689	27.6215	14.3038	27.6581	15.8469	28.4053	23.2811
27	129.763	130.694	153.326	284.522	169.964	284.303	182.914	301.044	195.868	301.45	210.673	298.165	226.71	305.373	268.534	313.569	125.082	122.098	136.224	231.856	148.188	242.043	170.216	256.1	190.142	259.679	218.326	270.647	233.086	278.908	243.763	298.59		27	0.765776	0.464274	4.6995	26.1451	7.47713	26.1085	9.63907	28.9033	11.8017	28.9711	14.2733	28.4227	16.9506	29.626	23.9329
28	128.415	128.584	153.784	288.707	171.875	294.092	181.782	308.495	197.977	307.261	216.525	302.164	230.015	310.936	270.508	318.699	125.364	121.393	136.366	235.458	150.141	244.968	170.993	259.198	190.071	262.336	219.56	273.776	234.014	286.039	244.954	300.684		28	0.540735	0.11202	4.77596	26.8437	7.79616	27.7427	9.45008	30.1472	12.1538	29.9412	15.2503	29.0903	17.5023	30.5548	24.2624
29	128.681	130.14	155.467	293.032	173.396	300.814	182.42	312.44	199.737	313.246	216.628	310.308	230.287	314.034	276.469	324.58	124.495	123.844	136.347	237.424	151.13	249.35	173.194	261.655	191.403	267.245	221.422	277.748	237.96	286.146	247.463	307.654		29	0.585142	0.371786	5.05693	27.5658	8.05008	28.8649	9.55659	30.8058	12.4476	30.9404	15.2674	30.4499	17.5477	31.072	25.2576
30	129.99	129.908	156.641	302.73	171.959	306.787	184.457	313.742	203.784	318.593	213.403	315.944	228.955	319.677	275.378	330.28	124.198	124.587	135.937	242.659	149.717	253.378	172.884	266.957	191.861	271.128	221.656	282.514	241.722	292.665	253.554	313.391		30	0.803673	0.333055	5.25292	29.1848	7.81018	29.8621	9.89666	31.0232	13.1232	31.8331	14.729	31.3908	17.3254	32.014	25.0755
31	127.944	129.43	157.917	304.362	174.822	310.092	185.965	325.239	204.566	325.079	217.097	317.758	230.249	324.137	277.762	334.267	124.911	123.47	136.163	245.722	151.117	255.868	175.354	271.879	194.246	274.13	223.482	286.459	242.523	297.773	257.078	315.553		31	0.462104	0.253255	5.46594	29.4573	8.28815	30.4139	10.1484	32.9426	13.2538	32.9159	15.3457	31.6937	17.5414	32.7586	25.4735
32	128.734	129.882	156.975	310.294	175.334	316.091	186.416	329.687	205.528	329.79	218.748	325.93	233.873	329.396	279.695	338.487	126.096	126.143	138.174	248	150.509	256.991	173.252	275.703	194.03	275.846	225.902	289.889	243.283	302.384	260.868	322.627		32	0.59399	0.328715	5.30868	30.4476	8.37362	31.4154	10.2237	33.6851	13.4144	33.7023	15.6214	33.0579	18.1464	33.6366	25.7962
33	130.887	129.681	157.511	315.763	174.745	321.025	187.52	333.849	206.451	336.157	221.531	331.986	235.588	334.903	281.766	341.656	127.213	123.8	136.494	252.056	152.6	260.766	175.482	275.423	197.37	279.652	227.319	295.363	247.116	303.872	264.491	326.142		33	0.953422	0.295159	5.39816	31.3606	8.27529	32.2391	10.408	34.38	13.5684	34.7653	16.086	34.0689	18.4327	34.5559	26.1419
34	128.214	128.922	160.572	320.288	178.349	326.758	189.417	337.154	206.136	342.546	220.156	334.731	232.543	340.225	286.215	345.855	126.822	123.97	138.231	254.791	149.82	263.04	174.699	281.522	197.869	285.578	226.407	295.73	247.648	310.726	265.4	331.901		34	0.507179	0.168447	5.90918	32.116	8.87696	33.1962	10.7247	34.9317	13.5159	35.8319	15.8564	34.5272	17.9244	35.4444	26.8846
35	129.66	129.688	158.616	327.755	177.561	331.793	189.835	345.722	208.01	344.621	223.646	342.404	237.191	343.988	287.211	351.522	125.321	125.305	140.318	255.442	152.695	264.587	177.437	283.792	196.328	286.625	229.074	300.842	250.607	311.28	270.406	336.71		35	0.748581	0.296327	5.58264	33.3626	8.74541	34.0367	10.7945	36.3621	13.8287	36.1783	16.4391	35.8082	18.7003	36.0726	27.0509
36	129.979	131.311	160.051	328.479	178.171	334.031	186.491	349.707	207.841	347.161	223.372	349.731	240.749	347.367	286.795	352.815	126.738	123.536	138.827	259.577	154.417	268.395	177.34	283.052	198.677	289.217	230.425	303.64	253.021	316.443	273.478	335.942		36	0.801836	0.567279	5.8222	33.4835	8.84725	34.4104	10.2362	37.0274	13.8005	36.6023	16.3933	37.0314	19.2943	36.6367	26.9815
37	129.407	130.478	162.364	332.271	180.13	340.065	189.36	353.493	210.68	354.246	225.271	352.063	242.805	351.635	288.794	358.686	128.535	125.577	140.878	261.056	152.589	272.979	180.521	287.025	200.144	292.467	234.106	307.791	254.768	320.493	273.251	342.329		37	0.706344	0.428214	6.20835	34.1165	9.17429	35.4177	10.7152	37.6594	14.2745	37.7851	16.7104	37.4207	19.6376	37.3492	27.3152
38	131.499	132.369	160.948	333.788	178.696	342.937	191.267	358.177	208.823	360.598	225.771	351.97	243.344	355.35	288.944	362.209	126.287	124.628	138.643	262.556	153.691	275.033	180.487	288.051	201.294	294.284	231.714	310.038	259.346	321.981	276.976	348.138		38	1.05559	0.743907	5.97195	34.3698	8.93489	35.8972	11.0336	38.4414	13.9644	38.8456	16.7938	37.4052	19.7275	37.9694	27.3402
39	130.557	130.274	161.776	337.535	180.114	346.77	191.575	363.105	212.064	362.359	227.079	359.224	244.984	356.738	291.525	366.197	127.008	126.736	139.701	268.741	153.509	275.599	178.755	293.899	202.874	300.088	235.39	312.881	260.258	325.723	276.394	347.229		39	0.898331	0.394157	6.11018	34.9953	9.17162	36.5371	11.085	39.2641	14.5055	39.1396	17.0122	38.6162	20.0013	38.2012	27.7711
40	131.306	130.506	162.105	342.508	179.876	349.333	195.016	367.067	213.381	365.374	229.461	364.216	246.837	363.296	291.304	369.209	127.101	125.403	141.681	268.628	154.348	279.23	181.107	295.653	203.873	302.565	235.376	314.29	260.279	330.985	277.408	353.432		40	1.02337	0.432888	6.16511	35.8255	9.13189	36.9649	11.6594	39.9255	14.7254	39.6429	17.4098	39.4496	20.3107	39.296	27.7342
41	131.813	130.94	164.172	347.506	181.832	356.511	192.632	373.659	210.68	370.379	231.283	369.251	251.894	369.798	295.383	375.284	127.528	125.869	140.706	271.867	153.383	282.641	179.394	299.829	205.198	305.304	236.056	317.967	263.053	329.51	282.527	357.829		41	1.10801	0.505342	6.51018	36.6599	9.45843	38.1633	11.2614	41.026	14.2745	40.4785	17.714	40.2902	21.1549	40.3815	28.4152
42	131.503	132.124	162.847	348.037	184.14	359.858	196.835	374.045	214.684	376.321	233.679	373.061	247.372	372.885	294.222	378.782	127.213	126.165	141.563	273.499	154.242	281.588	180.751	297.59	206.996	305.336	240.435	322.937	262.686	334.894	282.194	362.353		42	1.05626	0.703005	6.28898	36.7486	9.84374	38.722	11.9631	41.0905	14.9429	41.4705	18.114	40.9262	20.4	40.8968	28.2214
43	132.436	132.373	164.199	357.246	184.186	361.044	196.566	383.311	215.057	382.964	232.127	376.106	252.662	375.791	294.995	382.636	127.668	125.018	141.864	276.085	154.406	285.011	183.052	302.124	206.816	309.879	242.607	323.952	263.204	339.522	286.31	362.522		43	1.21202	0.744574	6.51469	38.286	9.85142	38.92	11.9182	42.6374	15.0052	42.5795	17.8549	41.4346	21.2831	41.382	28.3504
44	131.226	131.781	165.76	355.857	185.029	364.163	197.447	382.926	214.907	385.63	231.535	381.179	251.608	378.71	294.737	384.441	129.343	126.388	140.641	278.03	156.948	289.041	181.45	308.668	207.663	314.733	240.307	328.379	265.354	341.92	284.531	367.849		44	1.01002	0.645743	6.77529	38.0541	9.99215	39.4407	12.0653	42.5731	14.9801	43.0245	17.7561	42.2815	21.1072	41.8693	28.3073
45	131.738	130.103	163.19	359.773	184.062	369.607	196.424	386.162	218.007	388.602	232.637	382.396	253.83	382.193	299.018	388.717	127.012	125.567	139.751	280.802	156.87	291.035	184.048	307.658	211.202	314.064	242.72	331.102	268.931	342.638	283.808	373.001		45	1.09549	0.365609	6.34624	38.7078	9.83072	40.3496	11.8945	43.1134	15.4977	43.5207	17.9401	42.4846	21.4781	42.4508	29.022
46	131.716	131.917	165.06	363.025	185.027	372.955	195.741	393.773	217.826	390.496	229.518	388.792	252.924	389.434	297.612	390.779	128.399	126.808	139.407	281.561	155.359	290.929	185.618	315.689	211.288	317.176	244.245	331.88	268.173	346.659	286.964	376.069		46	1.09182	0.668447	6.65843	39.2508	9.99182	40.9085	11.7805	44.384	15.4674	43.8369	17.4194	43.5524	21.3269	43.6596	28.7873
47	132.107	132.733	164.033	366.848	185.693	376.623	200.857	396.237	220.039	395.678	235.852	391.25	255.34	387.395	294.741	393.187	128.895	124.822	140.998	286.333	156.508	294.533	185.393	311.537	212.199	320.226	246.995	333.941	268.547	347.421	287.94	377.993		47	1.1571	0.804674	6.48698	39.889	10.103	41.5209	12.6346	44.7953	15.8369	44.702	18.4768	43.9628	21.7302	43.3192	28.308
48	129.579	131.185	164.772	370.549	186.662	380.022	198.884	398.592	217.839	398.88	236.802	393.003	255.471	393.96	302.095	399.647	127.576	126.619	140.832	289.288	155.738	298.281	185.395	317.543	214.782	322.017	247.22	338.483	268.878	354.763	294.739	380.379		48	0.735058	0.546244	6.61035	40.5068	10.2648	42.0883	12.3052	45.1885	15.4696	45.2366	18.6354	44.2554	21.7521	44.4152	29.5357
49	129.4	132.39	165.697	370.695	188.221	383.628	200.979	402.265	222.232	398.71	238.034	398.38	256.686	396.21	297.145	403.127	128.946	126.009	142.682	288.208	157.783	297.248	187.178	316.04	214.652	327.937	249.808	342.89	272.802	355.473	294.78	381.403		49	0.705175	0.747412	6.76477	40.5312	10.525	42.6903	12.6549	45.8017	16.203	45.2082	18.8411	45.1531	21.9549	44.7908	28.7093
50	131.268	132.201	170.678	374.082	185.907	386.293	198.823	407.947	218.333	400.743	237.578	405.575	255.055	403.369	300.673	407.083	127.305	126.889	140.375	292.943	156.594	300.484	187.111	320.142	214.5	330.205	249.147	345.025	275.715	358.666	292.236	386.001		50	1.01703	0.71586	7.59633	41.0967	10.1387	43.1352	12.295	46.7503	15.5521	45.5476	18.7649	46.3543	21.6826	45.986	29.2983
51	131.62	132.395	164.516	378.61	186.707	391.743	203.041	412.049	224.55	404.988	234.795	407.142	258.534	405.731	301.369	412.261	127.929	126.277	143.244	293.562	156.451	305.635	187.892	321.073	216.665	330.804	252.956	343.69	274.167	361.086	287.655	388.977		51	1.07579	0.748247	6.56761	41.8526	10.2723	44.0451	12.9992	47.4351	16.59	46.2563	18.3003	46.6159	22.2634	46.3803	29.4145
52	134.043	134.302	166.535	380.679	187.625	393.516	200.755	413.362	223.401	407.235	236.319	411.936	262.475	404.177	302.689	413.899	127.989	126.921	145.055	293.315	157.874	305.387	191.752	323.196	213.058	333.545	251.138	347.213	280.159	361.692	286.497	390.575		52	1.4803	1.06661	6.90467	42.198	10.4255	44.3411	12.6175	47.6543	16.3982	46.6314	18.5548	47.4162	22.9214	46.1209	29.6349
53	135.544	133.194	165.835	379.335	189.678	395.338	201.621	417.423	218.461	412.343	237.345	417.011	265.224	412.853	304.166	412.523	126.188	124.982	143.555	295.257	159.462	304.81	190.884	325.159	213.947	336.47	254.09	350.817	280.634	366.896	309.451	391.079		53	1.73088	0.881636	6.78781	41.9736	10.7683	44.6452	12.7621	48.3322	15.5735	47.4841	18.726	48.2634	23.3803	47.5693	29.8815
54	133.181	132.123	164.34	387.122	185.702	399.605	201.885	423.242	222.192	420.544	232.668	415.991	254.9	414.662	305.521	414.076	125.388	127.719	143.95	296.881	158.694	307.738	189.617	327.958	219.636	335.979	251.553	351.957	279.02	369.143	297.822	393.773		54	1.33639	0.702838	6.53823	43.2736	10.1045	45.3576	12.8062	49.3037	16.1963	48.8533	17.9452	48.0932	21.6568	47.8713	30.1077
55	131.565	132.931	163.972	382.559	190.082	404.07	202.757	428.263	223.23	421.648	236.059	419.914	255.68	412.686	306.568	420.206	127.362	126.891	145.994	299.681	159.145	311.353	190.638	328.662	218.929	337.874	258.847	354.14	288.417	370.802	300.221	396.69		55	1.06661	0.83773	6.47679	42.5119	10.8357	46.103	12.9518	50.1419	16.3696	49.0376	18.5114	48.7481	21.787	47.5414	30.2825
56	130.535	133.745	169.09	384.446	188.666	410.61	205.134	436.989	223.463	418.728	238.42	426.562	265.91	419.519	285.916	422.92	125.505	127.574	144.072	301.614	165.999	313.461	196.528	331.998	224.031	343.752	258.42	357.818	282.992	371.818	300.518	402.396		56	0.894658	0.973623	7.33122	42.8269	10.5993	47.1948	13.3486	51.5987	16.4085	48.5501	18.9055	49.8579	23.4948	48.6821	26.8347
57	134.036	132.37	167.53	390.845	187.45	413.898	202.179	439.448	221.524	423.148	243.084	428.008	269.972	424.69	300.248	425.315	129.783	127.625	145.486	302.265	162.012	314.549	193.716	333.377	225.17	344.192	261.431	360.637	289.381	373.583	285.356	405.496		57	1.47913	0.744073	7.07078	43.8952	10.3963	47.7437	12.8553	52.0092	16.0848	49.288	19.6841	50.0993	24.173	49.5454	29.2274
58	133.256	131.894	165.8	390.038	191.265	408.69	201.893	446.176	219.749	428.579	247.737	429.71	271.598	422.005	300.05	425.933	127.877	129.253	147.299	303.848	159.253	316.859	193.39	335.605	224.375	348.024	262.857	362.735	282.087	378.25	294.266	405.499		58	1.34891	0.664608	6.78197	43.7604	11.0332	46.8743	12.8075	53.1324	15.7885	50.1947	20.4609	50.3835	24.4444	49.0972	29.1943
59	134.757	132.134	165.434	391.112	187.564	418.789	205.74	456.058	227.604	433.548	238.161	426.617	258.062	424.103	300.396	432.995	130.466	129.142	144.782	304.779	163.952	315.31	192.718	335.9	223.838	349.068	259.256	365.288	276.268	377.758	297.736	407.545		59	1.5995	0.704674	6.72087	43.9397	10.4154	48.5603	13.4497	54.7821	17.0998	51.0242	18.8623	49.8671	22.1846	49.4474	29.2521
60	129.459	133.543	165.45	390.052	188.502	423.525	199.26	454.856	224.265	440.207	249.704	430.783	246.722	430.608	295.649	433.539	133.217	126.369	147.793	306.265	160.047	317.509	194.956	338.346	222.999	348.218	259.883	367.124	284.56	380.699	300.681	412.415		60	0.715025	0.9399	6.72354	43.7628	10.572	49.3509	12.3679	54.5815	16.5424	52.1359	20.7893	50.5626	20.2915	50.5334	28.4596
low in 30'	125.176	127.913															121.485	121.007
	I1	I2	I3	I4	I5	I6	I7	I8	I9	I10	I11	I12	I13	I14	I15	I16
	M1	M2	M3	M4	M5	M6	M7	M8	M9	M10	M11	M12	M13	M14	M15	M16
	A1	A2	A3	A4	A5	A6	A7	A8	A9	A10	A11	A12	A13	A14	A15	A16
	E1	E2	E3	E4	E5	E6	E7	E8	E9	E10	E11	E12	E13	E14	E15	E16
	I1	I2	I3	I4	I5	I6	I7	I8	I9	I10	I11	I12	I13	I14	I15	I16
	M1	M2	M3	M4	M5	M6	M7	M8	M9	M10	M11	M12	M13	M14	M15	M16
[truncated: 51 more columns]

## Sheet: Figure E and F
																		delta max	386	386	386	386	386	386	386	386	373	373	373	373	373	373	373	373
																		lowest val in 30' rep1	107.38	107.38	107.38	107.38	107.38	107.38	107.38	107.38	101.708	101.708	101.708	101.708	101.708	101.708	101.708	101.708				curve of sQa with 4uM sQb									curve of sQb with 4uM sQa
	from AO19-19G								from AO19-19H									lowest val in 30' rep2	101.363	101.363	101.363	101.363	101.363	101.363	101.363	101.363	108.68	108.68	108.68	108.68	108.68	108.68	108.68	108.68
	R+Qc with curve of Qa and constant (4uM sQb)								R+Qc with curve of sQb and constant (4uM) sQa									lowest val in 30' rep3	99.391	99.391	99.391	99.391	99.391	99.391	99.391	99.391	107.453	107.453	107.453	107.453	107.453	107.453	107.453	107.453		average of 3 reps:
	J2	J4	J6	J8	J10	J12	J14	J16	O2	O4	O6	O8	O10	O12	O14	O16			HOPS + 0uM sQa	HOPS + 0.0625uM sQa	HOPS + 0.125uM sQa	HOPS + 0.25uM sQa	HOPS + 0.5uM sQa	HOPS + 1.0uM sQa	HOPS + 2.0uM sQa	HOPS + 4.0uM sQa	HOPS + 0uM sQb	HOPS + 0.0625uM sQb	HOPS + 0.125uM sQb	HOPS + 0.25uM sQb	HOPS + 0.5uM sQb	HOPS + 1.0uM sQb	HOPS + 2.0uM sQb	HOPS + 4.0uM sQb			HOPS + 0uM sQa	HOPS + 0.0625uM sQa	HOPS + 0.125uM sQa	HOPS + 0.25uM sQa	HOPS + 0.5uM sQa	HOPS + 1.0uM sQa	HOPS + 2.0uM sQa	HOPS + 4.0uM sQa		HOPS + 0uM sQb	HOPS + 0.0625uM sQb	HOPS + 0.125uM sQb	HOPS + 0.25uM sQb
0	123.242	120	123.139	115.799	116.478	118.205	119.611	120.468	119.259	127.494	122.781	134.156	135.067	136.021	127.042	126.274		0	4.10933	3.26943	4.08264	2.18109	2.35699	2.8044	3.16865	3.39067	4.70536	6.91314	5.6496	8.6992	8.94343	9.1992	6.79196	6.58606		0	3.22185	3.52945	4.16822	3.57142	3.19413	4.14344	3.67798	4.36908	0	3.59821	4.72878	4.57775	5.44987
1	116.75	117.268	120.634	116.116	114.719	117.829	119.318	116.967	112.814	117.484	120.428	128.936	129.581	130.002	124.407	126.548		1	2.42746	2.56166	3.43368	2.26321	1.9013	2.70699	3.09275	2.48368	2.97748	4.22949	5.01877	7.29973	7.47265	7.58552	6.08552	6.65952		1	1.83195	2.73523	3.46235	3.26356	2.81857	3.87064	3.51002	3.89853	1	1.96425	3.33119	4.00411	4.61662
2	114.679	117.96	120.5	116.989	115.34	119.764	117.962	117.893	111.38	118.541	116.677	128.11	124.299	125.984	124.508	126.642		2	1.89093	2.74093	3.39896	2.48938	2.06218	3.20829	2.74145	2.72358	2.59303	4.51287	4.01314	7.07828	6.05657	6.50831	6.1126	6.68472		2	1.66226	2.66865	3.41442	3.29301	2.94991	3.69128	3.39845	3.91744	2	1.86515	3.3059	3.42297	4.76542
3	113.521	119.209	120.628	119.475	116.752	119.778	122.401	119.41	111.575	116.774	118.36	126.91	124.045	125.735	123.017	125.95		3	1.59093	3.06451	3.43212	3.13342	2.42798	3.21192	3.89145	3.11658	2.64531	4.03914	4.46434	6.75657	5.98847	6.44155	5.71287	6.4992		3	1.35302	2.87737	3.49188	3.81934	3.33584	3.94931	4.06537	3.9766	3	1.71743	3.28347	3.57176	4.69017
4	113.417	118.802	120.238	119.717	117.16	121.556	123.725	120.483	108.639	116.317	117.052	126.084	123.87	124.969	124.784	127.488		4	1.56399	2.95907	3.33109	3.19611	2.53368	3.67254	4.23446	3.39456	1.85818	3.91662	4.11367	6.53512	5.94155	6.23619	6.1866	6.91153		4	1.23204	2.8367	3.40967	3.86805	3.53126	4.25216	4.28446	4.15354	4	1.31376	3.28213	3.68552	4.61966
5	112.643	120.784	121.394	122.442	122.451	124.38	125.464	122.171	107.682	116.633	118.916	125.437	125.455	125.902	125	129.265		5	1.36347	3.47254	3.63057	3.90207	3.9044	4.40415	4.68497	3.83187	1.60161	4.00134	4.6134	6.36166	6.36649	6.48633	6.2445	7.38794		5	1.29568	3.41667	3.95674	3.95648	4.13964	4.68731	4.4475	4.31339	5	1.27739	3.46443	4.0345	4.82529
6	112.898	120.926	122.922	124.976	124.637	126.582	126.343	125.101	107.234	118.395	118.547	128.348	127.37	125.955	127.219	131.703		6	1.42953	3.50933	4.02642	4.55855	4.47073	4.97461	4.91269	4.59093	1.4815	4.47373	4.51448	7.14209	6.87989	6.50054	6.83941	8.04155		6	1.15967	3.27591	3.96494	4.64171	4.60354	5.07979	4.9063	4.78394	6	1.4017	4.05996	4.47319	5.60527
7	112.227	123.833	124.61	125.802	126.439	127.548	132.338	128.311	106.922	118.662	120.135	127.182	128.452	128.473	128.785	134.712		7	1.2557	4.26244	4.46373	4.77254	4.93756	5.22487	6.4658	5.42254	1.39786	4.54531	4.94021	6.82949	7.16997	7.1756	7.25925	8.84826		7	1.01244	3.56926	4.15406	4.82453	4.86408	5.43869	5.25898	5.46623	7	1.10304	4.44647	4.85094	5.72815
8	113.106	125.687	125.958	129.001	129.414	129.966	133.317	133.038	107.731	118.776	119.791	127.073	129.419	129.99	130.631	138.877		8	1.48342	4.74275	4.81295	5.6013	5.70829	5.8513	6.71943	6.64715	1.61475	4.57587	4.84799	6.80027	7.42922	7.58231	7.75416	9.96488		8	0.863385	4.05268	4.64326	5.42055	5.46174	5.72444	5.88679	6.17556	8	0.985255	5.00277	4.76863	6.32735
9	113.879	128.278	127.311	134.291	131.235	133.56	138.583	137.517	106.245	121.141	123.758	128.945	129.288	131.171	133.878	143.488		9	1.68368	5.41399	5.16347	6.97176	6.18005	6.78238	8.08368	7.80751	1.21635	5.20992	5.91153	7.30214	7.3941	7.89893	8.62466	11.2011		9	1.08618	4.4361	4.95069	5.78601	5.79326	6.51157	6.88627	6.72988	9	0.847006	5.25594	5.7882	6.72404
10	111.126	129.083	130.355	132.219	134.436	138.419	141.09	139.669	106.06	122.23	124.2	129.756	131.546	132.269	134.906	146.239		10	0.970466	5.62254	5.95207	6.43497	7.00933	8.04119	8.73316	8.36503	1.16676	5.50188	6.03003	7.51957	7.99946	8.1933	8.90027	11.9386		10	0.708981	4.931	5.20889	6.08515	6.67306	7.09672	7.20199	7.25449	10	0.69008	5.82538	6.21483	7.31171
11	112.888	132.955	130.616	137.468	138.816	140.182	146.263	143.092	105.896	124.023	125.717	132.617	133.734	133.829	138.279	149.332		11	1.42694	6.62565	6.01969	7.79482	8.14404	8.49793	10.0733	9.25181	1.12279	5.98257	6.43673	8.2866	8.58606	8.61153	9.80456	12.7678		11	0.570984	5.48126	5.82625	6.75544	7.06287	7.67694	8.03653	7.81667	11	0.768186	6.40116	6.47873	7.77015
12	111.492	133.359	135.275	140.804	142.532	142.398	147.666	144.674	104.942	123.788	126.259	132.552	134.717	136.024	142.698	152.355		12	1.06528	6.73031	7.22668	8.65907	9.10674	9.07202	10.4368	9.66166	0.867024	5.91957	6.58204	8.26917	8.8496	9.2	10.9893	13.5783		12	0.648273	5.4171	6.12383	7.27124	7.79655	7.82306	8.64111	8.4133	12	0.465594	6.75827	7.06005	8.10036
13	109.259	136.006	136.665	143.445	146.001	145.802	152.289	146.679	104.557	125.464	127.717	135.233	136.174	139.555	144.551	156.04		13	0.486788	7.41606	7.58679	9.34326	10.0054	9.95389	11.6345	10.1811	0.763807	6.3689	6.97292	8.98794	9.24021	10.1466	11.4861	14.5662		13	0.363558	5.9133	6.53981	7.93834	8.55432	8.31857	9.37392	8.96356	13	0.433155	7.2798	7.75228	8.91975
14	108.464	139.041	137.685	145.511	147.783	148.23	154.008	152.449	103.547	125.332	129.271	135.182	139.052	140.619	148.587	157.656		14	0.280829	8.20233	7.85104	9.8785	10.4671	10.5829	12.0798	11.6759	0.493029	6.33351	7.38954	8.97426	10.0118	10.4319	12.5681	14.9995		14	0.426166	6.64249	6.98273	8.37487	8.93739	8.90544	10.0023	9.89767	14	0.384004	7.94021	8.21868	9.43333
15	107.47	141.805	140.045	150.196	153.192	152.986	160.006	154.967	103.998	129.909	132.605	138.066	139.876	143.71	150.14	158.427		15	0.0233161	8.91839	8.46244	11.0922	11.8684	11.815	13.6337	12.3282	0.613941	7.56059	8.28338	9.74745	10.2327	11.2606	12.9845	15.2062		15	0.361054	7.09206	7.26468	9.12712	9.65812	9.71718	10.8353	10.482	15	0.279088	8.58794	8.88391	10.2412
16	107.38	144.26	142.588	152.804	155.679	156.612	162.711	159.24	102.041	129.796	132.969	137.609	143.706	144.561	155.187	164.455		16	0	9.5544	9.12124	11.7679	12.5127	12.7544	14.3345	13.4352	0.0892761	7.53029	8.38097	9.62493	11.2595	11.4887	14.3375	16.8223		16	0.268912	7.56891	7.78739	9.65415	10.4459	10.3113	11.294	11.07	16	0.243342	9.179	9.32431	10.8731
17	108.992	146.897	144.086	154.629	154.192	159.243	163.897	160.253	102.87	131.544	135.572	138.591	146.564	149.027	156.557	167.065		17	0.417617	10.2376	9.50933	12.2407	12.1275	13.436	14.6417	13.6977	0.311528	7.99893	9.07882	9.8882	12.0257	12.6861	14.7048	17.522		17	0.562003	8.14845	8.1956	10.0604	10.3826	10.9307	11.9666	11.7101	17	0.265594	9.74754	10.1639	11.2319
18	108.558	149.29	147.216	158.85	159.967	160.252	167.975	164.389	102.814	132.881	137.198	140.834	149.599	151.899	162.879	173.901		18	0.305181	10.8575	10.3202	13.3342	13.6236	13.6974	15.6982	14.7692	0.296515	8.35737	9.51475	10.4895	12.8394	13.456	16.3997	19.3547		18	0.329447	8.8076	8.97755	11.1979	11.5006	11.3617	12.8042	12.5774	18	0.307775	10.5089	11.0511	12.1164
19	108.836	153.993	148.564	160.534	162.615	165.578	172.099	167.301	103.443	135.422	138.154	142.305	152.411	153.408	165.444	177.602		19	0.377202	12.0759	10.6694	13.7705	14.3096	15.0772	16.7666	15.5236	0.465147	9.03861	9.77105	10.8839	13.5933	13.8606	17.0874	20.3469		19	0.480656	9.45734	9.40682	11.3162	12.1452	12.2731	13.5328	12.9671	19	0.357551	11.4604	11.5592	12.8901
20	107.783	155.918	152.569	165.868	165.478	167.262	174.494	170.57	103.856	136.576	141.971	146.08	155.372	156.303	167.811	182.18		20	0.104404	12.5746	11.707	15.1523	15.0513	15.5135	17.387	16.3705	0.575871	9.34799	10.7944	11.896	14.3871	14.6367	17.722	21.5743		20	0.579965	10.263	10.2434	12.2455	12.7693	12.8616	14.6427	13.8234	20	0.362735	11.7343	12.2481	13.941
21	107.532	157.793	155.365	169.137	172.845	173.783	178.831	176.331	103.102	137.913	142.452	146.57	159.422	160.806	172.168	186.45		21	0.0393782	13.0604	12.4313	15.9992	16.9598	17.2028	18.5106	17.863	0.373727	9.70643	10.9233	12.0273	15.4729	15.844	18.8901	22.719		21	0.565976	10.4815	10.5152	13.0357	13.9482	13.883	15.3816	15.0693	21	0.338248	12.5761	12.7948	14.2189
22	107.848	161.982	156.845	172.816	174.37	176.767	181.81	181.773	103.286	142.425	144.879	151.276	163.549	163.019	176.112	189.327		22	0.121244	14.1456	12.8148	16.9523	17.3549	17.9759	19.2824	19.2728	0.423056	10.9161	11.574	13.289	16.5794	16.4373	19.9475	23.4903		22	0.438083	11.7351	11.2014	13.84	14.6271	14.4601	16.1744	15.7683	22	0.259786	13.2663	13.5368	15.3908
23	108.675	165.233	160.468	175.235	176.588	181.582	188.21	185.938	104.227	142.759	148.336	152.947	166.98	168.192	181.336	194.237		23	0.335492	14.9878	13.7534	17.579	17.9295	19.2233	20.9404	20.3518	0.675335	11.0056	12.5008	13.737	17.4992	17.8241	21.348	24.8067		23	0.464076	12.3352	11.888	14.5459	15.2817	15.5229	17.1145	16.7486	23	0.439589	14.1765	14.4248	16.0696
24	108.523	169.241	162.325	180.029	182.005	184.06	192.341	189.051	104.487	146.346	151.264	156.104	168.395	169.174	184.223	199.073		24	0.296114	16.0262	14.2345	18.821	19.3329	19.8653	22.0106	21.1583	0.74504	11.9673	13.2858	14.5834	17.8786	18.0874	22.122	26.1032		24	0.551813	13.106	12.4821	15.5614	16.3776	16.2886	18.2746	17.7171	24	0.518767	14.7818	15.1921	16.8098
25	108.009	173.021	165.731	185.376	185.412	188.522	196.154	195.123	103.675	148.306	152.162	158.5	172.365	172.916	187.009	204.84		25	0.162953	17.0054	15.1168	20.2062	20.2155	21.0212	22.9984	22.7313	0.527346	12.4928	13.5265	15.2257	18.9429	19.0906	22.8689	27.6493		25	0.371157	13.882	13.4401	16.5385	17.0569	17.1908	19.112	18.7721	25	0.594549	15.5952	16.0106	17.6245
26	109.44	176.932	168.885	187.381	187.339	191.629	202.708	195.661	104.416	150.538	156.57	161.672	175.334	176.885	193.778	205.009		26	0.533679	18.0187	15.9339	20.7256	20.7148	21.8262	24.6964	22.8707	0.726005	13.0912	14.7083	16.0761	19.7389	20.1547	24.6836	27.6946		26	0.815544	14.6396	14.2262	17.2811	18.0482	18.2095	20.0789	19.2763	26	0.535925	16.4193	16.8074	18.6994
27	110.14	180.594	172.247	192.478	193.329	196.58	206.573	201.765	103.544	153.801	158.884	163.551	179.454	180.893	196.315	210.02		27	0.715026	18.9674	16.8049	22.0461	22.2666	23.1088	25.6977	24.4521	0.492225	13.966	15.3287	16.5799	20.8434	21.2292	25.3638	29.0381		27	0.815458	15.8541	15.0449	18.3266	19.0392	18.9514	21.1206	20.3567	27	0.631725	17.2283	17.3403	19.5618
28	109.93	182.883	175.045	196.151	198.005	200.689	207.913	206.049	103.418	158.148	160.962	165.168	184.628	183.693	200.844	213.262		28	0.660622	19.5604	17.5298	22.9977	23.478	24.1733	26.0448	25.5619	0.458445	15.1314	15.8858	17.0134	22.2306	21.9799	26.578	29.9072		28	0.836701	16.2358	15.7108	18.9751	20.0048	19.9929	21.866	20.7871	28	0.47042	18.0623	18.243	19.9102
29	108.676	188.731	179.709	200.599	201.318	204.333	212.863	209.945	104.487	162.012	162.405	170.922	188.59	186.048	203.27	217.224		29	0.335751	21.0754	18.7381	24.15	24.3363	25.1174	27.3272	26.5712	0.74504	16.1673	16.2727	18.556	23.2928	22.6113	27.2284	30.9694		29	0.712003	17.4205	16.5404	20.0385	20.9875	20.8603	22.9845	22.4356	29	0.699821	18.9874	18.797	21.0001
30	107.661	191.475	180.973	202.438	206.216	205.772	215.015	212.9	103.565	163.095	168.869	171.158	189.984	190.813	208.842	225.252		30	0.0727979	21.7863	19.0655	24.6264	25.6052	25.4902	27.8847	27.3368	0.497855	16.4576	18.0056	18.6193	23.6665	23.8887	28.7223	33.1217		30	0.669948	18.0666	17.0125	20.7985	21.8637	21.5513	23.3915	22.8387	30	0.645755	19.7647	19.8252	21.9112
31	110.38	197.969	184.17	206.047	210.038	213.184	220.061	218.454	103.243	168.165	170.703	175.711	193.049	194.422	210.469	229.733		31	0.777202	23.4687	19.8938	25.5614	26.5953	27.4104	29.192	28.7756	0.411528	17.8169	18.4973	19.8399	24.4882	24.8563	29.1584	34.3231		31	0.790242	19.4438	18.0699	21.7553	22.9921	22.6845	24.7704	24.0895	31	0.622609	20.4116	20.6383	22.6177
32	109.516	200.954	189.384	211.83	213.711	214.485	226.462	222.613	102.624	170.495	173.968	178.437	197.103	196.889	218.769	229.6		32	0.553368	24.242	21.2446	27.0596	27.5469	27.7474	30.8503	29.8531	0.245576	18.4416	19.3727	20.5708	25.5751	25.5177	31.3836	34.2874		32	0.712349	20.1645	19.0557	22.8908	23.7372	23.7274	25.5515	24.9851	32	0.742627	21.2847	21.5613	23.7959
33	109.041	204.848	192.172	213.365	216.798	219.571	228.62	226.752	102.983	171.546	173.649	182.033	200.706	199.75	218.812	234.625		33	0.430311	25.2508	21.9668	27.4573	28.3466	29.065	31.4093	30.9254	0.341823	18.7233	19.2871	21.5349	26.541	26.2847	31.3952	35.6346		33	0.766926	21.1644	19.8841	23.6153	24.6695	24.4321	26.7158	25.7768	33	0.807149	21.5382	21.7107	24.5324
34	110.084	208.693	196.39	218.595	218.304	222.844	233.454	228.569	101.708	175.435	178.691	185.814	203.449	204.054	227.186	238.263		34	0.700518	26.2469	23.0596	28.8122	28.7368	29.913	32.6617	31.3961	0	19.766	20.6389	22.5485	27.2764	27.4386	33.6402	36.6099		34	0.847409	21.9604	20.4826	24.7534	25.3194	25.2503	27.9236	26.5314	34	0.501519	22.5254	22.8062	25.1533
35	111.092	212.717	199.311	222.733	224.424	226.226	236.085	235.296	103.206	178.299	181.613	187.699	207.363	207.663	224.985	240.151		35	0.961658	27.2894	23.8163	29.8842	30.3223	30.7891	33.3433	33.1389	0.401609	20.5338	21.4223	23.0539	28.3257	28.4062	33.0501	37.1161		35	0.928152	23.0626	21.4463	25.5512	26.8787	26.1877	28.5115	27.8494	35	0.610366	23.3007	23.6949	25.9769
36	109.224	213.909	202.131	224.934	228.602	229.553	239.492	236.105	104.825	182.066	184.888	191.831	209.415	207.948	231.918	245.371		36	0.47772	27.5982	24.5469	30.4544	31.4047	31.651	34.2259	33.3484	0.835657	21.5437	22.3003	24.1617	28.8759	28.4826	34.9088	38.5155		36	1.03394	23.9266	22.332	26.2607	27.5168	27.1105	29.6082	28.5278	36	0.994727	24.118	24.2079	26.6261
37	113.143	217.302	206.971	226.82	229.787	232.826	243.292	240.131	103.712	182.997	188.231	193	213.153	214.094	232.429	248.544		37	1.49301	28.4772	25.8008	30.943	31.7117	32.499	35.2104	34.3915	0.537265	21.7933	23.1965	24.4751	29.878	30.1303	35.0458	39.3662		37	1.31149	24.5615	23.3066	27.4113	28.1959	27.8131	30.3216	29.1966	37	0.826184	24.513	24.9597	27.5398
38	109.776	222.138	208.392	232.783	233.659	235.066	246.545	244.393	103.014	186.087	189.284	196.731	216.252	217.208	237.756	249.669		38	0.620725	29.7301	26.1689	32.4878	32.7148	33.0793	36.0531	35.4956	0.350134	22.6217	23.4788	25.4753	30.7088	30.9651	36.474	39.6678		38	0.890155	25.3284	23.9281	28.5136	29.4911	28.5705	31.1201	30.3915	38	0.806077	25.2836	25.5718	28.3231
39	109.114	224.182	213.215	235.555	237.474	240.006	250.161	245.29	103.576	189.402	193.363	200.185	218.889	221.413	242.246	254.513		39	0.449223	30.2596	27.4184	33.206	33.7031	34.3591	36.9899	35.728	0.500804	23.5105	24.5724	26.4013	31.4158	32.0925	37.6777	40.9665		39	0.974266	26.3109	24.7598	29.2229	30.1843	29.5898	32.3352	30.7508	39	0.757462	26.2083	26.6703	29.3577
40	111.352	228.628	216.602	237.051	241.275	243.062	253.313	249.555	104.492	193.552	198.007	201.9	222.365	225.259	246.281	256.532		40	1.02902	31.4114	28.2959	33.5935	34.6878	35.1508	37.8065	36.8329	0.746381	24.6231	25.8174	26.8611	32.3477	33.1236	38.7595	41.5078		40	1.23532	27.1358	25.761	29.8839	31.0063	30.5092	32.8875	31.945	40	0.93101	26.8366	27.1918	29.6832
41	110.458	231.609	219.817	242.318	243.678	245.151	256.857	250.918	104.826	194.859	200.072	207.207	227.757	228.482	247.166	260.328		41	0.797409	32.1837	29.1288	34.958	35.3104	35.692	38.7246	37.186	0.835925	24.9735	26.371	28.2839	33.7933	33.9877	38.9968	42.5255		41	1.25449	27.9541	26.5902	30.7744	31.6266	31.2446	34.0262	32.4712	41	1.01099	27.3252	27.965	30.8894
42	111.391	232.868	222.368	244.964	246.221	248.747	260.53	254.889	104.037	198.594	200.172	208.417	229.766	230.603	251.611	264.438		42	1.03912	32.5098	29.7896	35.6435	35.9692	36.6236	39.6762	38.2148	0.624397	25.9748	26.3979	28.6083	34.3319	34.5563	40.1885	43.6273		42	1.35173	28.5604	27.536	31.9317	32.8157	32.11	34.9554	33.2019	42	0.960947	28.1593	28.4828	31.3343
43	111.129	236.002	225.862	247.988	250.614	251.152	260.24	257.09	104.892	200.292	204.344	213.346	230.643	233.337	255.084	267.265		43	0.971244	33.3218	30.6948	36.4269	37.1073	37.2466	39.601	38.785	0.853619	26.43	27.5164	29.9298	34.567	35.2893	41.1196	44.3853		43	1.13523	29.4462	28.0447	32.456	33.5818	33.0756	35.3623	33.8843	43	1.09911	28.4438	29.0157	32.3504
44	112.417	238.809	227.656	252.4	252.02	255.323	263.5	261.145	104.302	204.359	207.034	215.541	235.696	234.145	255.134	271.162		44	1.30492	34.049	31.1596	37.5699	37.4715	38.3272	40.4456	39.8355	0.695442	27.5204	28.2375	30.5182	35.9217	35.5059	41.133	45.43		44	1.51623	30.2337	28.8825	33.4402	34.4099	33.6798	36.0521	34.9984	44	0.9437	29.3126	29.7811	32.8132
45	110.894	242.276	230.553	251.746	257.307	258.611	268.334	263.627	103.781	208.592	209.591	218.645	239.759	239.114	256.645	271.848		45	0.910363	34.9472	31.9101	37.4005	38.8412	39.179	41.6979	40.4785	0.555764	28.6552	28.9231	31.3504	37.011	36.8381	41.5381	45.6139		45	1.15466	31.053	29.7192	34.02	35.2183	34.6328	37.0048	35.9663	45	0.889991	30.4764	30.5584	33.4543
46	111.456	244.834	233.044	254.354	255.529	260.147	266.871	266.105	104.034	210.156	211.472	221.161	238.934	239.187	260.239	275.455		46	1.05596	35.6098	32.5554	38.0762	38.3806	39.5769	41.3189	41.1205	0.623592	29.0745	29.4273	32.0249	36.7898	36.8576	42.5016	46.581		46	1.48282	31.5881	29.6727	34.9326	35.7078	35.1968	37.5359	36.5916	46	1.06872	30.6724	30.8919	34.2056
47	110.726	245.488	233.822	255.438	258.83	263.331	273.522	265.102	103.737	214.599	214.972	224.254	241.636	242.279	263.733	277.524		47	0.866839	35.7793	32.757	38.357	39.2358	40.4018	43.042	40.8606	0.543968	30.2657	30.3657	32.8542	37.5142	37.6866	43.4383	47.1357		47	1.40622	32.0761	30.8462	35.291	36.5417	36.2604	38.3106	37.1459	47	1.05022	31.4766	31.8903	34.74
48	111.612	247.731	237.188	261.843	261.598	263.046	272.728	269.205	104.01	214.305	220.356	225.736	245.545	246.616	262.389	280.092		48	1.09637	36.3604	33.629	40.0163	39.9528	40.328	42.8363	41.9236	0.617158	30.1869	31.8091	33.2515	38.5622	38.8493	43.078	47.8241		48	1.33031	32.7921	31.5113	36.2016	37.2281	36.5348	39.0123	37.7451	48	1.04415	31.9173	32.4509	35.5868
49	110.554	251.87	239.884	258.932	264.744	267.607	273.516	274.132	105.417	218.905	219.653	230.192	246.783	249.446	267.878	280.302		49	0.82228	37.4326	34.3275	39.2622	40.7679	41.5096	43.0404	43.2	0.99437	31.4201	31.6206	34.4461	38.8941	39.608	44.5496	47.8804		49	1.44145	33.5757	32.0744	36.6229	37.8301	37.264	39.3825	38.6489	49	1.42216	32.7595	33.0408	36.4349
50	112.701	255.163	243.132	264.939	266.243	268.596	278.547	273.523	103.874	221.152	223.655	231.956	253.169	253.097	268.678	284.39		50	1.3785	38.2858	35.1689	40.8184	41.1562	41.7658	44.3438	43.0422	0.580697	32.0225	32.6936	34.919	40.6062	40.5869	44.7641	48.9764		50	1.70734	34.4508	33.0693	37.498	38.3691	38.0316	40.5683	39.0521	50	1.05362	33.1124	33.7307	36.8235
51	111.436	255.477	244.745	266.188	269.043	270.655	280.815	275.386	103.465	223.435	225.558	232.447	255.382	254.482	273.815	285.481		51	1.05078	38.3671	35.5868	41.142	41.8816	42.2992	44.9313	43.5249	0.471046	32.6346	33.2038	35.0507	41.1995	40.9582	46.1413	49.2689		51	1.45104	34.6482	33.5681	38.2474	39.1991	38.8054	40.8861	39.7956	51	1.13333	33.6248	34.1842	37.2274
52	113.734	255.941	246.69	270.658	270.743	272.32	281.846	278.643	105.526	227.683	230.254	236.995	252.013	256.755	273.885	290.031		52	1.64611	38.4873	36.0907	42.3	42.322	42.7306	45.1984	44.3687	1.02359	33.7735	34.4627	36.27	40.2962	41.5676	46.1601	50.4887		52	1.78826	35.3465	34.2003	39.1065	39.7311	39.3233	41.457	40.5145	52	1.34084	34.4707	35.1412	37.7902
53	113.253	257.375	247.225	270.301	271.599	276.914	282.838	279.094	105.536	227.846	231.01	238.487	257.773	258.893	277.452	292.177		53	1.5215	38.8588	36.2293	42.2075	42.5438	43.9207	45.4554	44.4855	1.02627	33.8172	34.6654	36.67	41.8405	42.1408	47.1164	51.0641		53	1.97979	35.9059	34.7502	39.2188	40.1558	40.1125	42.0645	41.0094	53	1.54415	34.5845	35.3538	38.5968
54	113.701	259.658	251.958	273.181	274.401	276.014	283.983	281.046	105.437	230.786	232.516	240.789	259.081	260.806	275.712	292.412		54	1.63756	39.4503	37.4554	42.9536	43.2697	43.6876	45.7521	44.9912	0.999732	34.6054	35.0692	37.2871	42.1912	42.6536	46.6499	51.1271		54	2.02288	36.4274	35.5376	39.8485	40.8864	40.4482	42.4766	41.5718	54	1.47194	35.6319	35.6147	39.0544
55	112.939	262.606	252.497	273.8	273.027	277.295	286.713	280.635	103.924	232.281	237.583	244.575	262.318	262.289	280.22	292.954		55	1.44016	40.214	37.5951	43.114	42.9137	44.0194	46.4593	44.8847	0.594102	35.0062	36.4276	38.3021	43.059	43.0512	47.8584	51.2724		55	1.93523	36.9359	35.8222	40.6799	41.1592	40.7743	43.2642	41.811	55	1.08856	35.7563	36.653	39.713
56	113.562	263.785	256.058	275.335	275.538	279.424	288.184	286.573	104.562	234.312	239.413	247.58	263.21	265.592	283.48	294.79		56	1.60155	40.5194	38.5176	43.5117	43.5642	44.571	46.8404	46.4231	0.765147	35.5507	36.9182	39.1078	43.2981	43.9367	48.7324	51.7646		56	1.93946	37.6263	36.4491	40.6801	42.0457	41.4252	43.7878	42.7406	56	1.20724	36.1984	37.2145	40.386
57	112.027	266.137	257.05	277.328	277.705	282.841	290.441	288.261	105.299	234.613	241.339	248.835	266.63	267.052	283.681	296.521		57	1.20389	41.1288	38.7746	44.028	44.1256	45.4562	47.4251	46.8604	0.962735	35.6314	37.4346	39.4442	44.215	44.3282	48.7863	52.2287		57	1.71952	38.1604	37.0685	41.6307	42.3837	42.1693	44.4003	43.4174	57	1.25076	36.6051	37.361	40.8845
58	112.621	266.13	259.772	278.646	284.629	285.286	292.891	288.528	104.987	236.681	241.913	251.377	266.905	268.947	286.201	300.512		58	1.35777	41.1269	39.4798	44.3694	45.9194	46.0896	48.0598	46.9295	0.879088	36.1858	37.5885	40.1257	44.2887	44.8362	49.4619	53.2987		58	1.79974	38.1055	37.8832	42.0187	43.0246	42.5671	44.6801	43.3373	58	1.56506	36.9804	37.7754	41.2657
59	112.595	271.114	259.86	281.294	280.974	284.87	290.609	289.695	105.787	239.657	245.048	253.527	268.476	270.27	287.6	297.318		59	1.35104	42.4181	39.5026	45.0554	44.9725	45.9819	47.4687	47.2319	1.09357	36.9836	38.429	40.7021	44.7099	45.1909	49.837	52.4424		59	2.00216	39.1415	37.7914	42.6555	43.0349	43.4642	45.0825	43.797	59	1.48865	37.7962	38.3525	41.6712
60	112.109	270.403	259.895	280.888	284.749	286.335	295.235	292.951	107.182	242.263	245.945	255.204	270.271	272.399	289.63	301.57		60	1.22513	42.2339	39.5117	44.9503	45.9505	46.3614	48.6671	48.0754	1.46756	37.6823	38.6694	41.1517	45.1912	45.7617	50.3812	53.5823		60	1.88826	39.2737	38.292	42.6558	44.0802	43.6619	45.4933	44.8932	60	1.62216	38.3345	38.7117	42.3788
low in 30'	107.38								101.708
	L2	L4	L6	L8	L10	L12	L14	L16	B2	B4	B6	B8	B10	B12	B14	B16
0	109.184	111.679	112.903	114.247	113.036	113.957	111.558	111.617	119.411	120.774	121.544	123.043	122.498	123.439	121.195	118.406		0	2.02617	2.67254	2.98964	3.33782	3.02409	3.26269	2.64119	2.65648	2.87694	3.24236	3.44879	3.85067	3.70456	3.95684	3.35523	2.60751
1	106.318	109.109	111.37	112.9	112.342	113.485	113.187	111.558	113.538	120.195	121.41	121.018	120.585	122.404	120.971	119.169		1	1.28368	2.00674	2.59249	2.98886	2.8443	3.14041	3.06321	2.64119	1.30241	3.08713	3.41287	3.30777	3.19169	3.67936	3.29517	2.81206			0	0.0625	0.125	0.25	0.5	1	2	4		0	0.0625	0.125	0.25
2	107.188	107.957	110.775	113.332	111.838	112.667	112.741	111.967	114.161	119.595	120.513	123.035	121.745	123.266	120.527	120.913		2	1.50907	1.70829	2.43834	3.10078	2.71373	2.9285	2.94767	2.74715	1.46944	2.92627	3.17239	3.84853	3.50268	3.91046	3.17614	3.27962		AVERAGE	0.669948	18.0666	17.0125	20.7985	21.8637	21.5513	23.3915	22.8387	AVERAGE	0.645755	19.7647	19.8252	21.9112
3	106.089	110.211	111.345	114.191	113.07	115.388	114.779	111.489	112.694	121.616	119.755	122.722	121.964	124.994	123.899	122.083		3	1.22435	2.29223	2.58601	3.32332	3.0329	3.63342	3.47565	2.62332	1.07614	3.4681	2.96917	3.76461	3.56139	4.37373	4.08016	3.5933		STD DEV	0.541787	3.46064	2.82501	3.3355	3.41439	4.01064	4.31974	4.11586	STD DEV	0.142097	10.3742	8.92348	7.72491
4	105.129	109.432	112.007	114.688	115.948	116.484	113.974	113.853	111.719	122.208	122.366	124.218	124.432	128.462	124.284	123.642		4	0.975648	2.09041	2.75751	3.45207	3.7785	3.91736	3.2671	3.23575	0.814745	3.62681	3.66917	4.16568	4.22306	5.30349	4.18338	4.01126
5	105.941	110.744	115.182	114.285	115.977	118.148	115.096	114.347	112.06	123.869	124.309	125.852	127.822	129.675	127.1	130.438		5	1.18601	2.43031	3.58005	3.34767	3.78601	4.34845	3.55777	3.36373	0.906166	4.07212	4.19008	4.60375	5.1319	5.62869	4.93834	5.83324
6	105.539	111.269	113.96	117.776	117.934	119.396	118.839	116.396	114.678	127.639	127.99	128.831	130.331	130.926	130.038	134.427		6	1.08187	2.56632	3.26347	4.25207	4.29301	4.67176	4.52746	3.89456	1.60804	5.08284	5.17694	5.40241	5.80456	5.96408	5.72601	6.90268
7	104.301	111.603	114.983	118.001	118.5	120.655	117.703	119.29	112.353	129.311	130.649	131.48	133.592	134.839	133.431	139.813		7	0.76114	2.65285	3.5285	4.31036	4.43964	4.99793	4.23316	4.6443	0.984718	5.5311	5.88981	6.1126	6.67882	7.01314	6.63566	8.34665
8	103.91	113.828	118.973	119.78	119.538	121.104	121.137	120.072	112.18	133.729	130.796	136.181	136.431	138.107	137.268	146.308		8	0.659845	3.22927	4.56218	4.77124	4.70855	5.11425	5.1228	4.84689	0.938338	6.71555	5.92922	7.37292	7.43995	7.88928	7.66434	10.0879
9	104.111	115.378	119.154	118.465	122.355	124.897	124.2	121.66	112.458	135.412	137.059	137.61	139.541	140.015	140.84	150.792		9	0.711917	3.63083	4.60907	4.43057	5.43834	6.09689	5.91632	5.25829	1.01287	7.16676	7.60831	7.75603	8.27373	8.4008	8.62198	11.2901
10	103.834	116.752	118.986	122.68	126.028	125.867	126.097	124.7	110.92	139.761	139.837	142.308	142.602	145.871	144.557	157.436		10	0.640155	3.98679	4.56554	5.52254	6.3899	6.34819	6.40777	6.04585	0.600536	8.33271	8.35308	9.01555	9.09437	9.97078	9.6185	13.0713
11	101.363	118.983	123.06	124.583	126.918	130.1	128.509	127.033	110.971	144.215	143.453	144.095	145.365	147.021	147.881	162.347		11	0	4.56477	5.62098	6.01554	6.62047	7.44482	7.03264	6.65026	0.614209	9.52681	9.32252	9.49464	9.83512	10.2791	10.5097	14.3879
12	103.114	118.927	123.972	125.836	128.479	128	130.872	128.828	109.688	147.717	146.106	147.187	150.798	150.645	151.842	164.233		12	0.453627	4.55026	5.85725	6.34016	7.02487	6.90078	7.64482	7.11528	0.270241	10.4657	10.0338	10.3236	11.2917	11.2507	11.5716	14.8936
13	103.694	121.961	124.252	128.336	132.759	130.535	133.907	132.547	110.557	151.326	150.08	151.898	153.233	154.568	153.821	175.26		13	0.603886	5.33627	5.92979	6.98782	8.13368	7.55751	8.43109	8.07876	0.503217	11.4332	11.0992	11.5866	11.9445	12.3024	12.1021	17.8499
14	104.315	124.109	129.573	132.282	134.04	133.63	136.775	135.09	110.041	156.276	154.031	154.991	156.973	157.172	160.281	179.729		14	0.764767	5.89275	7.30829	8.0101	8.46554	8.35933	9.17409	8.73756	0.364879	12.7603	12.1584	12.4158	12.9472	13.0005	13.834	19.048
15	103.447	125.388	128.63	132.959	135.631	135.359	139.187	137.956	108.971	159.017	157.371	159.085	163.384	161.637	162.38	186.948		15	0.539896	6.22409	7.06399	8.18549	8.87772	8.80725	9.79896	9.48005	0.0780161	13.4952	13.0539	13.5134	14.666	14.1976	14.3968	20.9834
16	103.477	128.061	129.319	135.795	139.228	138.301	139.482	140.129	109.757	164.131	160.969	164.644	165.794	163.091	167.804	191.254		16	0.547668	6.91658	7.24249	8.92021	9.80959	9.56943	9.87539	10.043	0.28874	14.8662	14.0185	15.0038	15.3121	14.5874	15.8509	22.1378
17	102.885	130.083	133.004	136.452	138.814	141.063	143.862	141.386	108.68	167.958	166.09	167.259	170.525	168.685	172.387	193.982		17	0.394301	7.44041	8.19715	9.09041	9.70233	10.285	11.0101	10.3687	0	15.8922	15.3914	15.7048	16.5804	16.0871	17.0796	22.8692
18	103.63	133.142	135.761	141.222	143.494	142.617	147.127	146.83	109.045	173.754	172.077	171.98	176.422	173.834	176.292	203.189		18	0.587306	8.2329	8.9114	10.3262	10.9148	10.6876	11.856	11.779	0.0978552	17.4461	16.9965	16.9705	18.1614	17.4676	18.1265	25.3375
19	104.383	135.656	139.834	141.33	145.955	147.318	149.356	147.795	110.589	179.771	175.794	176.616	179.583	178.375	182.226	207.365		19	0.782383	8.8842	9.96658	10.3541	11.5523	11.9054	12.4334	12.029	0.511796	19.0592	17.993	18.2134	19.0088	18.685	19.7174	26.4571
20	104.889	137.997	140.771	142.583	147.878	150.412	154.506	150.89	109.578	182.324	178.473	182.4	184.889	181.766	187.927	213.336		20	0.913472	9.49067	10.2093	10.6788	12.0505	12.707	13.7676	12.8308	0.240751	19.7437	18.7113	19.7641	20.4314	19.5941	21.2458	28.0579
21	104.39	139.786	142.177	147.478	151.902	153.182	157.114	156.56	109.764	186.821	182.899	184.844	187.19	185.408	191.96	219.432		21	0.784197	9.95415	10.5736	11.9469	13.093	13.4246	14.4433	14.2997	0.290617	20.9493	19.8979	20.4193	21.0483	20.5705	22.3271	29.6922
22	104.432	145.137	147.652	148.941	155.448	154.678	161.478	158.347	110.009	189.871	187.356	188.484	192.99	190.542	194.666	225.124		22	0.795078	11.3404	11.992	12.3259	14.0117	13.8122	15.5738	14.7627	0.3563	21.767	21.0928	21.3952	22.6032	21.9469	23.0525	31.2182
23	103.588	145.656	149.518	152.426	158.736	158.656	163.793	162.026	109.791	196.397	190.836	194.201	196.503	192.012	198.418	230.547		23	0.576425	11.4749	12.4754	13.2288	14.8635	14.8427	16.1736	15.7158	0.297855	23.5166	22.0257	22.9279	23.545	22.341	24.0584	32.6721
24	103.701	149.675	151.435	157.196	161.73	162.478	168.269	167.838	109.341	198.974	194.999	196.93	201.197	198.354	203.814	232.83		24	0.605699	12.5161	12.972	14.4645	15.6391	15.8329	17.3332	17.2215	0.177212	24.2075	23.1418	23.6595	24.8035	24.0413	25.5051	33.2842
25	102.426	151.657	157.439	158.392	165.416	165.33	171.762	169.545	111.561	204.123	201.308	201.165	204.524	202.318	206.29	237.104		25	0.275389	13.0295	14.5275	14.7744	16.594	16.5718	18.2381	17.6637	0.772386	25.5879	24.8332	24.7949	25.6954	25.104	26.1689	34.43
26	104.363	154.207	159.186	161.132	168.302	171.731	174.196	173.156	110.885	209.432	203.112	207.506	208.665	206.222	211.594	241.646		26	0.777202	13.6902	14.9801	15.4842	17.3417	18.2301	18.8687	18.5992	0.591153	27.0113	25.3169	26.4949	26.8056	26.1507	27.5909	35.6477
27	104.857	159.367	162.435	165.694	170.257	173.505	179.936	175.69	111.973	212.849	206.551	210.99	212.573	209.787	213.699	245.291		27	0.905181	15.0269	15.8218	16.6661	17.8482	18.6896	20.3557	19.2557	0.882842	27.9273	26.2389	27.429	27.8534	27.1064	28.1552	36.6249
28	105.737	162.355	165.715	166.767	177.255	176.886	183.345	177.316	110.131	216.873	211.261	212.175	219.146	213.534	218.658	249.395		28	1.13316	15.801	16.6715	16.944	19.6611	19.5655	21.2389	19.6769	0.389008	29.0062	27.5016	27.7466	29.6155	28.111	29.4847	37.7252
29	104.893	165.029	167.612	169.853	179.455	180.734	185.657	185.775	110.675	222.704	216.168	216.287	223.133	219.587	220.879	253.393		29	0.914508	16.4938	17.163	17.7435	20.2311	20.5624	21.8378	21.8684	0.534853	30.5694	28.8172	28.8491	30.6845	29.7338	30.0802	38.7971
30	104.478	168.802	171.543	175.681	182.692	185.091	190.222	185.968	111.135	225.762	218.783	223.328	224.645	221.404	227.498	256.845		30	0.806995	17.4712	18.1813	19.2534	21.0697	21.6912	23.0205	21.9184	0.658177	31.3893	29.5182	30.7367	31.0898	30.2209	31.8547	39.7225
31	104.536	172.514	175.561	178.84	187.235	188.268	193.615	191.068	111.807	226.681	223.608	225.495	225.847	225.404	229.278	262.147		31	0.822021	18.4329	19.2223	20.0718	22.2466	22.5142	23.8995	23.2396	0.838338	31.6357	30.8118	31.3177	31.4121	31.2933	32.3319	41.144
32	104.193	176	180.265	183.334	189.603	193.038	195.872	195.617	114.41	230.818	227.593	229.213	230.632	227.797	234.369	263.87		32	0.733161	19.336	20.4409	21.236	22.8601	23.75	24.4842	24.4181	1.53619	32.7448	31.8802	32.3145	32.6949	31.9349	33.6968	41.6059
33	104.958	179.176	183.684	186.786	193.064	194.463	200.301	197.003	113.645	235.286	227.798	233.263	234.571	232.592	238.873	266.622		33	0.931347	20.1588	21.3267	22.1303	23.7567	24.1192	25.6316	24.7772	1.3311	33.9426	31.9351	33.4003	33.7509	33.2204	34.9043	42.3437
34	104.907	181.839	187.289	189.694	196.264	197.911	205.605	201.366	111.656	237.614	231.773	233.349	235.358	236.77	241.311	267.492		34	0.918135	20.8487	22.2606	22.8837	24.5858	25.0124	27.0057	25.9075	0.797855	34.5668	33.0008	33.4233	33.9619	34.3405	35.5579	42.5769
35	103.944	186.687	190.235	192.353	200.704	202.779	208.782	204.975	110.779	241.552	236.868	238.266	241.616	241.114	242.966	271.736		35	0.668653	22.1047	23.0238	23.5725	25.736	26.2736	27.8288	26.8425	0.562735	35.6225	34.3668	34.7416	35.6397	35.5051	36.0016	43.7147
36	106.955	190.258	193.197	196.757	203.274	206.824	210.481	210.538	112.478	244.777	238.2	241.287	242.095	241.933	246.38	273.545		36	1.4487	23.0298	23.7912	24.7135	26.4018	27.3215	28.2689	28.2837	1.01823	36.4871	34.7239	35.5515	35.7681	35.7247	36.9169	44.1997
37	107.086	193.801	197.001	202.563	206.554	209.23	214.343	211.797	112.984	247.304	242.559	246.153	248.296	245.137	251.459	276.087		37	1.48264	23.9477	24.7767	26.2176	27.2516	27.9448	29.2694	28.6098	1.15389	37.1646	35.8925	36.856	37.4306	36.5836	38.2786	44.8812
38	105.679	195.637	200.273	204.286	211.701	210.227	217.374	217.585	112.24	249.764	244.211	247.395	248.494	247.668	253.294	280.036		38	1.11813	24.4233	25.6244	26.664	28.585	28.2031	30.0547	30.1093	0.954424	37.8241	36.3354	37.189	37.4836	37.2622	38.7705	45.9399
39	106.117	198.835	201.353	206.462	213.979	216.684	222.067	218.547	111.956	253.599	249.636	252.812	254.491	249.944	256.051	282.719		39	1.23161	25.2518	25.9041	27.2277	29.1751	29.8759	31.2705	30.3585	0.878284	38.8523	37.7898	38.6413	39.0914	37.8724	39.5097	46.6592
40	105.315	201.736	207.456	208.903	216.647	221.023	223.991	222.308	112.027	255.471	249.449	251.979	254.173	254.771	258.872	285.147		40	1.02383	26.0034	27.4852	27.8601	29.8663	31	31.7689	31.3329	0.897319	39.3542	37.7397	38.418	39.0062	39.1665	40.266	47.3102
41	106.586	205.009	209.338	212.786	218.06	220.904	230.15	224.134	113.491	257.231	254.033	258.353	259.64	255.451	260.054	285.648		41	1.35311	26.8513	27.9728	28.8661	30.2324	30.9692	33.3645	31.806	1.28981	39.826	38.9686	40.1268	40.4718	39.3488	40.5828	47.4445
42	106.853	206.721	214.576	216.685	225.373	226.719	231.655	228.88	113.516	261.394	256.19	259.207	260.761	261.142	263.474	287.736		42	1.42228	27.2948	29.3298	29.8762	32.1269	32.4756	33.7544	33.0355	1.29651	40.9421	39.5469	40.3558	40.7724	40.8745	41.4997	48.0043
43	106.295	210.532	214.622	218.345	227.453	230.655	235.824	230.806	113.542	260.565	257.535	262.618	264.003	263.049	269.63	289.217		43	1.27772	28.2821	29.3417	30.3062	32.6658	33.4953	34.8345	33.5345	1.30349	40.7198	39.9075	41.2702	41.6416	41.3858	43.1501	48.4013
44	108.122	212.772	218.83	221.53	230.774	230.4	235.407	234.533	112.764	263.171	259.773	263.079	266.272	264.91	267.853	291.455		44	1.75104	28.8624	30.4319	31.1313	33.5262	33.4293	34.7264	34.5	1.09491	41.4185	40.5075	41.3938	42.2499	41.8847	42.6737	49.0013
45	106.154	216.259	222.388	227.841	231.132	233.42	240.166	240.643	112.756	269.215	264.571	265.743	268.116	265.647	270.302	293.523		45	1.24119	29.7658	31.3536	32.7663	33.6189	34.2117	35.9593	36.0829	1.09276	43.0389	41.7938	42.108	42.7442	42.0823	43.3303	49.5558
46	108.05	218.284	221.046	228.316	235.687	235.464	242.542	241.019	113.675	268.662	264.806	266.802	270.498	269.361	271.2	294.348		46	1.73238	30.2904	31.006	32.8894	34.799	34.7412	36.5749	36.1803	1.33914	42.8906	41.8568	42.392	43.3828	43.078	43.571	49.7769
47	107.68	221.194	227.053	231.445	239.738	241.932	245.168	244.63	113.874	270.34	268.301	269.536	271.385	271.429	277.664	292.915		47	1.63653	31.0443	32.5622	33.7	35.8484	36.4168	37.2552	37.1158	1.39249	43.3405	42.7938	43.1249	43.6206	43.6324	45.304	49.3928
48	107.098	222.112	229.479	233.402	242.349	243.32	248.379	246.626	114	272.606	267.949	272.071	274.71	273.084	276.49	296.295		48	1.48575	31.2821	33.1907	34.207	36.5249	36.7764	38.087	37.6329	1.42627	43.948	42.6995	43.8046	44.5121	44.0761	44.9893	50.2989
49	107.732	224.734	230.149	236.469	244.058	245.212	250.382	249.466	115.173	274.504	273.255	275.052	274.838	275.188	278.323	300.791		49	1.65	31.9614	33.3642	35.0016	36.9676	37.2666	38.606	38.3687	1.74075	44.4568	44.122	44.6038	44.5464	44.6402	45.4807	51.5043
50	108.252	229.404	233.992	235.811	244.782	248.929	254.662	251.82	113.766	274.874	273.229	274.816	277.422	277.137	281.827	298.807		50	1.78472	33.1712	34.3598	34.8311	37.1552	38.2295	39.7148	38.9785	1.36354	44.556	44.115	44.5405	45.2391	45.1627	46.4201	50.9724
51	107.465	230.582	235.999	242.911	247.553	251.165	255.691	254.014	115.715	278.237	275.904	277.642	279.175	277.091	283.542	297.855		51	1.58083	33.4764	34.8798	36.6705	37.8731	38.8088	39.9813	39.5469	1.88606	45.4576	44.8322	45.2981	45.7091	45.1504	46.8799	50.7172
52	108.661	234.37	239.166	244.786	250.543	253.614	255.525	257.812	115.477	280.184	277.473	278.053	282.261	283.968	284.319	304.397		52	1.89067	34.4578	35.7003	37.1562	38.6477	39.4433	39.9383	40.5308	1.82225	45.9796	45.2528	45.4083	46.5365	46.9941	47.0882	52.471
53	109.816	235.557	243.051	245.917	252.292	255.037	261.016	259.026	116.314	278.598	277.459	281.803	283.353	280.575	287.997	305.171		53	2.1899	34.7653	36.7067	37.4492	39.1008	39.8119	41.3609	40.8453	2.04665	45.5544	45.2491	46.4137	46.8292	46.0845	48.0743	52.6786
54	109.781	238.013	243.89	247.148	254.87	255.871	263.008	259.082	116.404	284.486	277.406	282.764	280.926	282.609	288.38	308.428		54	2.18083	35.4016	36.9241	37.7681	39.7687	40.028	41.8769	40.8598	2.07078	47.133	45.2349	46.6713	46.1786	46.6298	48.1769	53.5517
55	108.824	239.439	245.865	251.434	256.458	259.066	266.462	263.117	113.575	284.022	281.138	283.315	284.566	285.479	288.017	307.538		55	1.9329	35.771	37.4358	38.8785	40.1801	40.8557	42.7718	41.9052	1.31233	47.0086	46.2354	46.819	47.1544	47.3992	48.0796	53.3131
56	109.052	242.552	246.754	251.417	262.442	261.029	267.238	264.801	115.027	285.646	283.724	285.729	287.439	281.08	288.749	309.836		56	1.99197	36.5775	37.6661	38.8741	41.7303	41.3642	42.9728	42.3415	1.70161	47.444	46.9287	47.4662	47.9247	46.2198	48.2759	53.9292
57	108.876	243.838	249.889	254.617	260.341	264.001	269.857	266.307	114.469	286.276	282.737	288.442	287.954	289.98	292.856	310.826		57	1.94637	36.9106	38.4782	39.7031	41.186	42.1342	43.6513	42.7316	1.55201	47.6129	46.6641	48.1936	48.0627	48.6059	49.3769	54.1946
58	108.739	244.622	254.343	257.713	263.231	264.734	272.892	265.115	116.206	286.337	284.061	288.047	288.455	291.817	291.987	313.729		58	1.91088	37.1137	39.6321	40.5052	41.9347	42.3241	44.4376	42.4228	2.01769	47.6292	47.019	48.0877	48.1971	49.0984	49.144	54.9729
59	110.058	248.311	253.113	259.734	264.402	270.564	273.876	267.051	116.343	289.866	286.467	288.813	291.686	292.845	291.881	312.489		59	2.25259	38.0694	39.3135	41.0288	42.2381	43.8345	44.6925	42.9244	2.05442	48.5753	47.6641	48.293	49.0633	49.374	49.1155	54.6405
60	109.646	248.143	254.422	259.776	267.79	271.454	272.773	271.669	116.027	291.458	286.735	292.267	290.999	295.79	292.627	311.634		60	2.14585	38.0259	39.6526	41.0396	43.1158	44.065	44.4067	44.1207	1.96971	49.0021	47.7359	49.219	48.8791	50.1635	49.3155	54.4113
low in 30'	101.363								108.68
	N2	N4	N6	N8	N10	N12	N14	N16	C2	C4	C6	C8	C10	C12	C14	C16
0	113.017	117.326	120.36	119.445	115.608	123.953	119.556	126.643	119.435	122.488	124.741	121.626	117.257	122.005	120.689	120.669		0	3.53005	4.64637	5.43238	5.19534	4.2013	6.36321	5.22409	7.0601	3.21233	4.03083	4.63485	3.79973	2.62842	3.90134	3.54853	3.54316
1	106.28	113.431	116.224	116.91	113.712	121.642	116.275	124.754	113.469	117.438	120.809	119.547	117.666	119.723	119.226	120.487		1	1.78472	3.63731	4.36088	4.5386	3.7101	5.76451	4.37409	6.57073	1.61287	2.67694	3.5807	3.24236	2.73807	3.28954	3.1563	3.49437
2	105.516	113.12	116.398	115.946	115.116	118.448	116.785	123.638	113.171	116.698	118.954	120.021	117.926	118.815	120.301	120.445		2	1.58679	3.55674	4.40596	4.28886	4.07383	4.93705	4.50622	6.28161	1.53298	2.47855	3.08338	3.36944	2.80777	3.04611	3.4445	3.48311
3	104.192	112.034	116.597	118.696	116.941	118.701	118.031	123.284	112.79	116.193	119.694	120.692	117.774	119.145	121.307	122.011		3	1.24378	3.27539	4.45751	5.0013	4.54663	5.00259	4.82902	6.1899	1.43083	2.34316	3.28177	3.54933	2.76702	3.13458	3.71421	3.90295
4	103.855	112.749	115.373	118.521	115.918	119.334	120.049	121.896	112.184	116.043	119.664	119.233	118.66	118.179	118.71	119.42		4	1.15648	3.46062	4.14041	4.95596	4.28161	5.16658	5.35181	5.83031	1.26836	2.30295	3.27373	3.15818	3.00456	2.8756	3.01796	3.20831
5	104.554	116.171	117.377	117.223	117.643	119.885	119.076	121.565	112.393	116.106	119.762	120.547	118.334	118.535	121.694	123.768		5	1.33756	4.34715	4.65959	4.61969	4.7285	5.30933	5.09974	5.74456	1.3244	2.31984	3.3	3.51046	2.91716	2.97105	3.81796	4.37399
6	103.126	113.874	117.166	119.133	118.872	120.98	119.767	122.035	111.614	117.238	121.359	123.385	119.542	120.799	122.319	122.418		6	0.967617	3.75207	4.60492	5.11451	5.04689	5.59301	5.27876	5.86632	1.11555	2.62332	3.72815	4.27131	3.24102	3.57802	3.98552	4.01206
7	103.33	114.03	116.645	120.199	119.521	122.911	118.992	123.832	110.909	119.624	121.339	123.277	121.865	120.792	124.204	124.426		7	1.02047	3.79249	4.46995	5.39067	5.21503	6.09326	5.07798	6.33187	0.926542	3.263	3.72279	4.24236	3.86381	3.57614	4.49088	4.5504
8	101.116	115.549	116.972	122.123	122.429	123.353	121.849	126.537	108.955	121.317	120.615	125.39	121.615	121.634	122.804	126.303		8	0.446891	4.18601	4.55466	5.88912	5.96839	6.20777	5.81813	7.03264	0.402681	3.71689	3.52869	4.80885	3.79678	3.80188	4.11555	5.05362
9	102.722	115.848	118.998	122.38	121.63	125.081	125.094	126.889	108.616	120.102	121.794	126.528	122.885	122.106	125.294	127.728		9	0.862953	4.26347	5.07953	5.9557	5.7614	6.65544	6.65881	7.12383	0.311796	3.39115	3.84477	5.11394	4.13727	3.92842	4.78311	5.43566
10	101.384	119.4	119.112	123.701	124.944	126.028	124.346	127.772	108.583	121.036	123.348	127.595	124.948	125.536	125.905	129.797		10	0.516321	5.18368	5.10907	6.29793	6.61995	6.90078	6.46503	7.35259	0.302949	3.64155	4.26139	5.4	4.69035	4.84799	4.94692	5.99035
11	100.495	119.669	121.926	124.311	124.188	126.751	126.425	128.526	109.57	121.232	121.168	128.077	125.105	125.033	126.647	132.863		11	0.28601	5.25337	5.83808	6.45596	6.42409	7.08808	7.00363	7.54793	0.56756	3.6941	3.67694	5.52922	4.73244	4.71314	5.14584	6.81233
12	101.035	118.578	119.801	125.695	127.407	128.327	129.66	132.058	108.421	121.961	124.478	128.745	126.492	126.701	127.854	133.835		12	0.425907	4.97073	5.28756	6.81451	7.25803	7.49637	7.84171	8.46295	0.259517	3.88954	4.56434	5.70831	5.10429	5.16032	5.46944	7.07292
13	99.391	118.643	122.948	128.279	128.433	128.126	130.488	132.706	107.574	122.512	126.792	130.522	127.33	127.451	129.156	137.227		13	0	4.98756	6.10285	7.48394	7.52383	7.4443	8.05622	8.63083	0.0324397	4.03727	5.18472	6.18472	5.32895	5.36139	5.8185	7.98231
14	100.29	121.904	121.736	127.322	129.806	129.399	133.178	135.21	108.55	125.084	126.506	133.227	129.086	129.956	130.211	140.947		14	0.232902	5.83238	5.78886	7.23601	7.87953	7.77409	8.75311	9.27953	0.294102	4.72681	5.10804	6.90992	5.79973	6.03298	6.10134	8.97962
15	101.398	123.067	123.584	130.671	131.152	132.314	134.414	136.592	107.995	125.014	127.276	135.289	131.338	130.335	132.785	140.461		15	0.519948	6.13368	6.26762	8.10363	8.22824	8.52927	9.07332	9.63756	0.145308	4.70804	5.31448	7.46273	6.40349	6.13458	6.79142	8.84933
16	100.391	123.461	126.405	131.33	134.191	132.626	136.726	136.956	108.766	126.627	128.242	137.258	133.193	131.781	133.926	144.042		16	0.259067	6.23575	6.99845	8.27435	9.01554	8.6101	9.67228	9.73187	0.352011	5.14048	5.57346	7.99062	6.9008	6.52225	7.09732	9.80938
17	102.765	125.513	125.949	133.552	135.359	134.405	138.948	142.098	109.263	127.414	129.913	137.676	136.332	135.32	136.252	145.593		17	0.874093	6.76736	6.88031	8.85	9.31813	9.07098	10.2479	11.064	0.485255	5.35147	6.02145	8.10268	7.74236	7.47105	7.72091	10.2252
18	99.761	127.694	129.117	137.734	137.85	136.834	141.305	142.561	109.426	128.801	132.228	140.609	137.403	135.5	137.482	147.791		18	0.0958549	7.33238	7.70104	9.93342	9.96347	9.70026	10.8585	11.1839	0.528954	5.72332	6.64209	8.88901	8.02949	7.5193	8.05067	10.8145
19	100.481	128.001	128.667	137.312	140.205	137.361	143.389	143.197	107.81	130.89	133.241	143.16	139.308	136.9	140.824	149.4		19	0.282383	7.41192	7.58446	9.82409	10.5736	9.83679	11.3984	11.3487	0.0957105	6.28338	6.91367	9.57292	8.54021	7.89464	8.94665	11.2458
20	102.178	133.064	133.413	141.486	142.646	139.397	148.696	146.749	108.466	130.248	134.453	145.361	142.885	139.244	140.27	153.59		20	0.722021	8.72358	8.81399	10.9054	11.206	10.3642	12.7733	12.2689	0.271582	6.11126	7.23861	10.163	9.4992	8.52306	8.79812	12.3692
21	102.766	131.931	132.358	142.472	144.907	141.934	150.308	149.745	108.76	133.834	135.664	145.537	145.361	140.299	143.794	155.717		21	0.874352	8.43005	8.54067	11.1609	11.7917	11.0215	13.1909	13.0451	0.350402	7.07265	7.56327	10.2102	10.163	8.8059	9.7429	12.9394
22	100.927	136.907	133.349	146.644	147.698	144.137	152.145	150.611	107.453	133.995	137.083	150.304	145.805	142.5	145.86	157.368		22	0.397927	9.71917	8.79741	12.2417	12.5148	11.5922	13.6668	13.2694	0	7.11582	7.9437	11.4882	10.282	9.39598	10.2968	13.382
23	101.245	140.087	135.811	148.915	149.772	147.651	154.317	154.119	108.742	137.32	140.082	150.512	148.322	143.531	149.14	161.766		23	0.480311	10.543	9.43523	12.8301	13.0521	12.5026	14.2295	14.1782	0.345576	8.00724	8.74772	11.544	10.9568	9.67239	11.1761	14.5611
24	102.3	140.986	138.917	151.11	154.052	150.218	159.144	156.409	109.818	137.929	141.578	152.909	150.134	146.388	150.602	164.04		24	0.753627	10.7759	10.2399	13.3987	14.1609	13.1676	15.4801	14.7715	0.634048	8.17051	9.14879	12.1866	11.4426	10.4383	11.5681	15.1708
25	101.997	144.21	140.6	155.882	154.825	153.351	161.535	160.847	109.258	139.922	143.53	155.394	151.638	150.209	152.726	168.509		25	0.67513	11.6111	10.6759	14.635	14.3611	13.9793	16.0995	15.9212	0.483914	8.70483	9.67212	12.8528	11.8458	11.4627	12.1375	16.3689
26	103.775	146.522	144.802	159.736	161.491	155.64	163.744	162.536	108.537	141.603	146.234	157.909	156.321	150.156	155.824	171.106		26	1.13575	12.2101	11.7645	15.6334	16.0881	14.5723	16.6718	16.3588	0.290617	9.1555	10.3971	13.5271	13.1013	11.4485	12.9681	17.0651
27	102.58	151.764	147.672	162.184	165.022	157.506	166.201	166.41	109.393	143.976	146.444	162.197	158.259	155.11	159.116	174.05		27	0.826166	13.5681	12.508	16.2676	17.0028	15.0557	17.3083	17.3624	0.520107	9.79169	10.4534	14.6767	13.6209	12.7767	13.8507	17.8544
28	102.156	150.907	149.305	164.948	164.53	162.077	170.084	165.484	109.556	144.937	149.757	163.293	159.834	156.083	159.389	178.99		28	0.716321	13.3461	12.9311	16.9837	16.8754	16.2399	18.3142	17.1225	0.563807	10.0493	11.3416	14.9705	14.0432	13.0375	13.9239	19.1788
29	102.81	156.103	152.351	169.728	170.396	164.629	175.775	172.218	110.51	145.594	149.606	165.623	163.426	158.116	162.603	181.162		29	0.885751	14.6922	13.7202	18.222	18.3951	16.901	19.7886	18.8671	0.819571	10.2255	11.3011	15.5952	15.0062	13.5826	14.7855	19.7611
30	103.753	157.068	152.623	170.862	172.408	166.835	173.77	173.738	110.367	150.151	152.033	168.541	162.761	159.068	162.98	184.878		30	1.13005	14.9422	13.7907	18.5158	18.9163	17.4725	19.2692	19.2609	0.781233	11.4472	11.9517	16.3775	14.8279	13.8378	14.8866	20.7574
31	102.369	162.81	157.652	175.173	177.11	169.368	181.299	177.568	109.758	151.401	154.473	169.727	166.826	161.231	167.969	186.979		31	0.771503	16.4298	15.0935	19.6326	20.1345	18.1288	21.2197	20.2531	0.617962	11.7823	12.6059	16.6954	15.9177	14.4177	16.2241	21.3206
32	102.674	164.685	159.15	178.046	179.697	175.374	181.686	179.232	109.117	154.704	157.551	176.467	168.561	163.657	168.93	189.408		32	0.850518	16.9155	15.4816	20.3769	20.8047	19.6847	21.3199	20.6842	0.446113	12.6678	13.4311	18.5024	16.3828	15.0681	16.4818	21.9718
33	103.016	169.194	162.536	181.448	183.945	177.024	188.582	182.874	110.245	152.021	159.337	177.063	170.203	167.414	170.128	195.461		33	0.939119	18.0837	16.3588	21.2583	21.9052	20.1122	23.1065	21.6277	0.748525	11.9485	13.9099	18.6622	16.8231	16.0753	16.8029	23.5946
34	102.956	171.904	161.644	186.489	186.765	179.778	192.43	185.433	110.089	156.851	162.578	180.143	175.305	169.217	174.797	197.766		34	0.923575	18.7858	16.1277	22.5642	22.6358	20.8256	24.1034	22.2907	0.706702	13.2434	14.7788	19.4879	18.1909	16.5587	18.0547	24.2126
35	103.846	175.795	166.936	188.931	194.261	182.382	193.43	190.359	110.686	158.725	164.506	182.557	177.84	173.666	176.641	201.594		35	1.15415	19.7938	17.4987	23.1969	24.5777	21.5003	24.3624	23.5668	0.866756	13.7458	15.2957	20.1351	18.8705	17.7515	18.5491	25.2389
36	103.928	181.037	171.411	190.542	194.902	185.697	201.024	191.843	111.669	160.878	165.639	182.669	178.623	174.081	178.013	202.193		36	1.17539	21.1518	18.658	23.6142	24.7438	22.3591	26.3298	23.9513	1.13029	14.3231	15.5995	20.1651	19.0804	17.8627	18.9169	25.3995
37	103.092	181.453	174.053	196.174	198.302	188.154	201.623	194.303	110.39	161.841	166.35	186.858	181.212	179.754	181.064	208.587		37	0.958808	21.2596	19.3425	25.0733	25.6246	22.9956	26.485	24.5886	0.787399	14.5812	15.7901	21.2882	19.7745	19.3836	19.7349	27.1137
38	102.987	183.662	176.556	201.252	204.281	193.687	204.586	198.089	111.607	164.913	170.494	190.651	185.712	179.853	184.281	210.224		38	0.931606	21.8319	19.9909	26.3889	27.1736	24.429	27.2526	25.5694	1.11367	15.4048	16.9011	22.3051	20.981	19.4102	20.5973	27.5525
39	104.185	189.797	180.284	204.518	206.215	194.094	210.348	200.391	110.785	168.111	173.283	193.357	188.756	183.083	184.759	215.278		39	1.24197	23.4212	20.9567	27.235	27.6746	24.5345	28.7453	26.1658	0.893298	16.2622	17.6488	23.0306	21.7971	20.2761	20.7255	28.9075
40	105.772	192.002	182.388	208.236	209.265	197.346	211.667	206.194	111.74	169.12	174.661	196.117	190.243	187.383	189.134	217.509		40	1.65311	23.9925	21.5018	28.1982	28.4648	25.3769	29.087	27.6692	1.14933	16.5327	18.0182	23.7705	22.1957	21.429	21.8984	29.5056
41	105.617	195.224	186.893	209.397	212.632	203.891	215.15	209.098	110.837	171.52	176.664	197.933	192.797	188.66	192.104	220.463		41	1.61295	24.8272	22.6689	28.499	29.337	27.0725	29.9894	28.4215	0.907239	17.1761	18.5552	24.2574	22.8804	21.7713	22.6946	30.2976
42	105.543	199.275	190.057	216.254	216.546	204.502	220.733	208.843	111.041	172.956	180.201	200.848	196.963	190.374	194.221	222.292		42	1.59378	25.8767	23.4886	30.2754	30.351	27.2308	31.4358	28.3554	0.96193	17.5611	19.5035	25.0389	23.9973	22.2308	23.2622	30.7879
43	103.856	202.587	192.408	217.642	218.944	209.342	221.566	212.618	111.706	175.27	180.648	203.878	199.238	193.774	197.52	226.174		43	1.15674	26.7347	24.0977	30.635	30.9723	28.4847	31.6516	29.3334	1.14021	18.1815	19.6233	25.8512	24.6072	23.1424	24.1466	31.8287
44	105.153	206.659	196.107	221.442	223.807	212.423	226.71	217.737	111.335	178.319	184.285	206.401	200.829	197.792	199.778	228.227		44	1.49275	27.7896	25.056	31.6194	32.2321	29.2829	32.9842	30.6596	1.04075	18.9989	20.5984	26.5276	25.0338	24.2196	24.752	32.3791
45	104.457	209.193	199.341	222.499	227.523	217.151	228.15	220.354	111.263	181.065	185.628	207.807	200.751	198.066	201.479	232.249		45	1.31244	28.4461	25.8938	31.8933	33.1948	30.5078	33.3573	31.3376	1.02145	19.7351	20.9584	26.9046	25.0129	24.293	25.208	33.4574
46	105.799	210.806	197.654	229.984	230.414	220.102	233.387	224.741	112.091	182.247	187.243	212.639	206.1	201.42	204.577	235.389		46	1.6601	28.864	25.4567	33.8324	33.9438	31.2723	34.714	32.4741	1.24343	20.052	21.3914	28.2	26.4469	25.1922	26.0386	34.2992
47	106.012	212.893	204.458	229.921	232.719	222.766	233.081	228.551	111.982	185.125	191.42	212.792	208.871	202.507	207.087	237.543		47	1.71528	29.4047	27.2194	33.8161	34.5409	31.9624	34.6347	33.4611	1.21421	20.8236	22.5113	28.241	27.1898	25.4836	26.7115	34.8767
48	104.829	218.024	206.368	232.103	235.288	224.841	238.789	229.391	111.515	188.085	192.662	218.25	211.044	205.955	210.101	239.693		48	1.40881	30.7339	27.7142	34.3813	35.2065	32.5	36.1135	33.6788	1.08901	21.6172	22.8442	29.7043	27.7724	26.408	27.5196	35.4531
49	106.54	220.337	209.522	236.826	237.405	226.832	240.285	232.09	113.165	191.011	194.66	220.303	212.014	208.5	210.71	241.872		49	1.85207	31.3332	28.5313	35.6049	35.7549	33.0158	36.501	34.378	1.53137	22.4016	23.3799	30.2547	28.0324	27.0903	27.6828	36.0373
50	106.952	222.507	213.952	241.611	241.423	231.015	244.706	235.014	111.991	192.343	198.404	223.124	216.01	212.943	215.026	242.726		50	1.95881	31.8953	29.679	36.8446	36.7959	34.0995	37.6464	35.1355	1.21662	22.7587	24.3836	31.011	29.1038	28.2815	28.8399	36.2662
51	106.036	223.301	216.109	241.94	245.464	235.68	245.089	239.567	111.343	192.431	198.9	224.327	218.143	214.985	215.643	243.589		51	1.7215	32.101	30.2378	36.9298	37.8427	35.308	37.7456	36.315	1.0429	22.7823	24.5166	31.3335	29.6756	28.829	29.0054	36.4976
52	106.447	227.135	218.318	245.543	246.934	237.564	250.835	240.837	111.842	195.701	203.344	225.665	219.797	214.874	219.946	249.38		52	1.82798	33.0943	30.8101	37.8632	38.2236	35.7961	39.2342	36.644	1.17668	23.659	25.708	31.6922	30.119	28.7992	30.159	38.0501
53	107.991	230.992	220.265	246.07	249.247	240.686	251.387	244.903	113.27	198.397	204.981	229.449	221.442	218.599	222.667	251.769		53	2.22798	34.0935	31.3145	37.9997	38.8228	36.6049	39.3772	37.6974	1.55952	24.3818	26.1469	32.7067	30.5601	29.7979	30.8885	38.6906
54	108.077	232.292	223.811	249.251	252.328	244.639	253.022	249.407	112.471	201.29	206.447	231.307	225.213	222.365	222.962	254.083		54	2.25026	34.4303	32.2332	38.8238	39.621	37.629	39.8008	38.8642	1.34531	25.1574	26.5399	33.2048	31.571	30.8075	30.9676	39.311
55	108.781	233.807	224.593	253.973	255.272	243.939	255.958	248.553	112.523	201.651	209.267	234.339	228.153	222.286	226.235	254.582		55	2.43264	34.8228	32.4358	40.0472	40.3837	37.4477	40.5614	38.643	1.35925	25.2542	27.296	34.0177	32.3592	30.7863	31.845	39.4448
56	107.979	237.509	227.402	252.458	257.043	247.385	259.775	251.696	111.761	202.943	211.134	236.451	231.687	223.992	229.493	258.339		56	2.22487	35.7819	33.1635	39.6547	40.8425	38.3404	41.5503	39.4573	1.15496	25.6005	27.7965	34.5839	33.3067	31.2437	32.7185	40.452
57	107.143	240.056	230.448	258.273	260.891	249.612	261.991	256.339	112.069	206.563	211.835	238.061	233.076	224.803	231.137	258.484		57	2.00829	36.4417	33.9526	41.1611	41.8394	38.9174	42.1244	40.6601	1.23753	26.571	27.9845	35.0155	33.6791	31.4611	33.1592	40.4909
58	107.615	238.644	232.707	258.352	258.499	251.041	259.747	256.337	114.161	208.634	214.574	240.18	233.33	230.163	235.158	259.908		58	2.13057	36.0759	34.5378	41.1816	41.2197	39.2876	41.543	40.6596	1.79839	27.1263	28.7188	35.5836	33.7472	32.8981	34.2373	40.8727
59	108.666	241.967	232.785	261.057	261.102	256.015	265.704	258.557	112.369	211.257	215.491	241.802	234.421	229.994	235.703	265.337		59	2.40285	36.9368	34.558	41.8824	41.894	40.5762	43.0863	41.2347	1.31796	27.8295	28.9646	36.0185	34.0397	32.8528	34.3834	42.3282
60	108.245	244.377	237.238	261.424	266.044	255.95	266.938	263.377	112.784	213.083	218.345	244.589	236.046	232.976	236.273	266.182		60	2.29378	37.5611	35.7117	41.9775	43.1744	40.5593	43.406	42.4834	1.42922	28.319	29.7298	36.7657	34.4753	33.6523	34.5362	42.5547
low in 30'	99.391								107.453
[truncated: 4 more columns]
